# Supplementary material
Source: PubMed Central journal article supplement (PMC3872452)
Supplement: NIHMS544236-supplement-Table_S1.pdf [file NIHMS544236-supplement-Table_S1.pdf]

Supplementary Table 1

Supplementary Table 1a.

| Region ID | № Markers | Begin (bp) | End (bp)  | Size (Mb) | Marker Positions           | Marker Name                                                                                        |
|-----------|-----------|------------|-----------|-----------|----------------------------|----------------------------------------------------------------------------------------------------|
| 1         | 3         | 5341266    | 9340284   | 3.999     | 1,2,3                      | X-5341266,X-7356474,X-9340284                                                                      |
| 2         | 2         | 13104651   | 15050461  | 1.946     | 5,6                        | X-13104651,X-15050461                                                                              |
| 3         | 2         | 18803431   | 20795755  | 1.992     | 8,9                        | X-18803431,X-20795755                                                                              |
| 4         | 5         | 33501694   | 39773137  | 6.271     | 12,13,14,15,16             | X-33501694,X-34174488,X-35878071,X-37795275,X-39773137                                             |
| 5         | 3         | 41709915   | 44367258  | 2.657     | 17,18,19                   | X-41709915,X-43106676,X-44367258                                                                   |
| 6         | 2         | 46255125   | 48135929  | 1.881     | 20,21                      | X-46255125,X-48135929                                                                              |
| 7         | 2         | 50114168   | 53404903  | 3.291     | 22,23                      | X-50114168,X-53404903                                                                              |
| 8         | 2         | 54000940   | 55567420  | 1.566     | 24,25                      | X-54000940,X-55567420                                                                              |
| 9         | 3         | 58166277   | 62000232  | 3.834     | 27,28,29                   | X-58166277,X-60091526,X-62000232                                                                   |
| 10        | 3         | 64029949   | 67114633  | 3.085     | 30,31,32                   | X-64029949,X-65262708,X-67114633                                                                   |
| 11        | 3         | 68083956   | 71371693  | 3.288     | 33,34,35                   | X-68083956,X-69903086,X-71371693                                                                   |
| 12        | 9         | 73109135   | 90640869  | 17.532    | 36,37,38,39,40,41,42,43,44 | X-73109135,X-74210508,X-76207917,X-80161976,X-84132877,X-86116001,X-87868682,X-89621357,X-90640869 |
| 13        | 3         | 104292926  | 108342366 | 4.049     | 52,53,54                   | X-104292926,X-106332092,X-108342366                                                                |
| 14        | 5         | 112587884  | 122771038 | 10.183    | 57,58,59,60,61             | X-112587884,X-116719686,X-118730961,X-120066236,X-122771038                                        |
| 15        | 3         | 125116822  | 129088513 | 3.972     | 63,64,65                   | X-125116822,X-127137209,X-129088513                                                                |
| 16        | 2         | 130534180  | 131280281 | 0.746     | 66,67                      | X-130534180,X-131280281                                                                            |
| 17        | 5         | 141246340  | 148630688 | 7.384     | 73,74,75,76,77             | X-141246340,X-142906662,X-144055466,X-146641816,X-148630688                                        |
| 18        | 2         | 150391903  | 152318392 | 1.926     | 78,79                      | X-150391903,X-152318392                                                                            |
| 19        | 3         | 154163942  | 158162685 | 3.999     | 80,81,82                   | X-154163942,X-156119666,X-158162685                                                                |

Supplementary Table 1a.

| Region ID | № Markers | Begin (bp) | End (bp) | Size (Mb) | Marker Positions | Marker Name                                            |
|-----------|-----------|------------|----------|-----------|------------------|--------------------------------------------------------|
| 1         | 3         | 15050461   | 18803431 | 3.753     | 6,7,8            | X-15050461,X-16960010,X-18803431                       |
| 2         | 5         | 37795275   | 44367258 | 6.572     | 15,16,17,18,19   | X-37795275,X-39773137,X-41709915,X-43106676,X-44367258 |
| 3         | 2         | 46255125   | 48135929 | 1.881     | 20,21            | X-46255125,X-48135929                                  |

Supplementary Table 1

|    |   |           |           |        |                         |                                                                                                 |
|----|---|-----------|-----------|--------|-------------------------|-------------------------------------------------------------------------------------------------|
| 4  | 2 | 56774880  | 58166277  | 1.391  | 26,27                   | X-56774880,X-58166277                                                                           |
| 5  | 4 | 60091526  | 65262708  | 5.171  | 28,29,30,31             | X-60091526,X-62000232,X-64029949,X-65262708                                                     |
| 6  | 5 | 67114633  | 73109135  | 5.995  | 32,33,34,35,36          | X-67114633,X-68083956,X-69903086,X-71371693,X-73109135                                          |
| 7  | 3 | 74210508  | 80161976  | 5.951  | 37,38,39                | X-74210508,X-76207917,X-80161976                                                                |
| 8  | 8 | 84132877  | 95487518  | 11.355 | 40,41,42,43,44,45,46,47 | X-84132877,X-86116001,X-87868682,X-89621357,X-90640869,X-91623850,X-94318040,X-95487518         |
| 9  | 3 | 104292926 | 108342366 | 4.049  | 52,53,54                | X-104292926,X-106332092,X-108342366                                                             |
| 10 | 8 | 110649330 | 125116822 | 14.467 | 56,57,58,59,60,61,62,63 | X-110649330,X-112587884,X-116719686,X-118730961,X-120066236,X-122771038,X-123140908,X-125116822 |
| 11 | 3 | 127137209 | 130534180 | 3.397  | 64,65,66                | X-127137209,X-129088513,X-130534180                                                             |
| 12 | 2 | 131280281 | 133181529 | 1.901  | 67,68                   | X-131280281,X-133181529                                                                         |
| 13 | 3 | 134705783 | 138190470 | 3.485  | 69,70,71                | X-134705783,X-136571189,X-138190470                                                             |
| 14 | 3 | 142906662 | 146641816 | 3.735  | 74,75,76                | X-142906662,X-144055466,X-146641816                                                             |
| 15 | 2 | 150391903 | 152318392 | 1.926  | 78,79                   | X-150391903,X-152318392                                                                         |
| 16 | 3 | 158162685 | 162159618 | 3.997  | 82,83,84                | X-158162685,X-160150056,X-162159618                                                             |
