# Supplementary material
Source: PubMed Central journal article supplement (PMC3872452)
Supplement: NIHMS544236-supplement-Table_S2.pdf [file NIHMS544236-supplement-Table_S2.pdf]

Supplementary Table 2

| Choice | № Region** | Chrom | Window Start | Window End | № Markers | Markers                 | Dean et al. (2008) | Dean et al. (2011) | Dorus et al. (2010)* | White et al. (2011)                                                                                                       |
|--------|------------|-------|--------------|------------|-----------|-------------------------|--------------------|--------------------|----------------------|---------------------------------------------------------------------------------------------------------------------------|
| CZ&BV  | 1          | 1     | 2218496      | 4218496    | 1         | 1-3218496               | -                  | -                  | -                    | -                                                                                                                         |
| CZ&BV  | 2          | 1     | 27291770     | 29291770   | 1         | 1-28291770              | -                  | -                  | -                    | -                                                                                                                         |
| CZ&BV  | 3          | 1     | 78219888     | 80219888   | 1         | 1-79219888              | Serpine2           | Serpine2           | -                    | -                                                                                                                         |
| CZ&BV  | 4          | 2     | 9053633      | 11053633   | 1         | 2-10053633              | -                  | -                  | -                    | -                                                                                                                         |
| CZ&BV  | 5          | 2     | 33033588     | 35033588   | 1         | 2-34033588              | -                  | Hspa5              | Hc                   | -                                                                                                                         |
| CZ&BV  | 6          | 2     | 73558017     | 75558017   | 1         | 2-74558017              | -                  | -                  | -                    | Relative testis weight (52.2-105.9-128.5 Mb),Relative testis weight (52.2-96-123.9 Mb)                                    |
| CZ&BV  | 7          | 2     | 117591908    | 119591908  | 1         | 2-118591908             | -                  | -                  | -                    | Relative testis weight (52.2-96-123.9 Mb),Relative testis weight (52.2-105.9-128.5 Mb)                                    |
| CZ&BV  | 8          | 2     | 145686258    | 147686258  | 1         | 2-146686258             | -                  | -                  | -                    | -                                                                                                                         |
| CZ&BV  | 9          | 2     | 173674207    | 179792933  | 2         | 2-174674207,2-178792933 | -                  | -                  | -                    | -                                                                                                                         |
| CZ&BV  | 10         | 3     | 73249497     | 75249497   | 1         | 3-74249497              | -                  | -                  | -                    | Distal bent tail (30-51.4-75.9 Mb)                                                                                        |
| CZ&BV  | 11         | 4     | 102390028    | 104156313  | 1         | 4-103390028             | -                  | -                  | -                    | Relative testis weight (98.8-108.9-115.3 Mb),Relative testis weight (98.8-108.9-115.3 Mb)                                 |
| CZ&BV  | 12         | 4     | 116552547    | 118127746  | 1         | 4-117127746             | -                  | -                  | -                    | -                                                                                                                         |
| CZ&BV  | 13         | 5     | 19496322     | 21496322   | 1         | 5-20496322              | -                  | -                  | -                    | -                                                                                                                         |
| CZ&BV  | 14         | 5     | 50550602     | 52550602   | 1         | 5-51550602              | -                  | -                  | -                    | -                                                                                                                         |
| CZ&BV  | 15         | 5     | 70595790     | 74538258   | 2         | 5-71595790,5-73538258   | -                  | -                  | -                    | -                                                                                                                         |
| CZ&BV  | 16         | 5     | 107510292    | 111571863  | 2         | 5-108510292,5-110571863 | -                  | -                  | -                    | -                                                                                                                         |
| CZ&BV  | 17         | 5     | 138601762    | 140481724  | 1         | 5-139601762             | -                  | -                  | -                    | Distal bent tail (133-146.4-148.4 Mb),Total abnormal sperm (122.4-138.2-148.4 Mb),Distal bent tail (132.2-139.6-148.4 Mb) |

Supplementary Table 2

|       |    |    |           |           |   |                         |      |      |                  |                                               |
|-------|----|----|-----------|-----------|---|-------------------------|------|------|------------------|-----------------------------------------------|
| CZ&BV | 18 | 6  | 4782646   | 6782646   | 1 | 6-5782646               | -    | -    | -                | -                                             |
| CZ&BV | 19 | 6  | 15485595  | 17261037  | 1 | 6-16485595              | -    | -    | -                | -                                             |
| CZ&BV | 20 | 6  | 48605478  | 50605478  | 1 | 6-49605478              | Svs1 | Svs1 | -                | -                                             |
| CZ&BV | 21 | 6  | 69810385  | 73554423  | 2 | 6-70810385,6-72554423   | -    | -    | -                | -                                             |
| CZ&BV | 22 | 6  | 77506201  | 79506201  | 1 | 6-78506201              | -    | -    | -                | -                                             |
| CZ&BV | 23 | 6  | 81657845  | 83657845  | 1 | 6-82657845              | -    | -    | -                | -                                             |
| CZ&BV | 24 | 6  | 97793902  | 99656333  | 1 | 6-98793902              | -    | -    | -                | -                                             |
| CZ&BV | 25 | 7  | 15643634  | 17643634  | 1 | 7-16643634              | -    | -    | -                | Sperm head PC1 (13.7-23.4-44.3 Mb)            |
| CZ&BV | 26 | 8  | 76982361  | 78982361  | 1 | 8-77982361              | -    | -    | -                | Seminiferous tubule area (35.5-87.1-102.7 Mb) |
| CZ&BV | 27 | 8  | 94400455  | 97505302  | 2 | 8-95400455,8-96505302   | -    | -    | -                | Seminiferous tubule area (35.5-87.1-102.7 Mb) |
| CZ&BV | 28 | 9  | 28019307  | 30019307  | 1 | 9-29019307              | -    | -    | -                | -                                             |
| CZ&BV | 29 | 9  | 94750430  | 96750430  | 1 | 9-95750430              | -    | -    | Atp1b3(membrane) | -                                             |
| CZ&BV | 30 | 10 | 14492552  | 16492552  | 1 | 10-15492552             | -    | -    | -                | -                                             |
| CZ&BV | 31 | 10 | 102600049 | 104600049 | 1 | 10-103600049            | -    | -    | -                | -                                             |
| CZ&BV | 32 | 11 | 3550977   | 5443394   | 1 | 11-4550977              | Tcn2 | -    | -                | -                                             |
| CZ&BV | 33 | 11 | 8117435   | 10117435  | 1 | 11-9117435              | -    | -    | -                | -                                             |
| CZ&BV | 34 | 11 | 12072486  | 14072486  | 1 | 11-13072486             | -    | -    | -                | -                                             |
| CZ&BV | 35 | 11 | 22356000  | 24356000  | 1 | 11-23356000             | -    | -    | -                | -                                             |
| CZ&BV | 36 | 11 | 25179507  | 26557146  | 1 | 11-25557146             | -    | -    | -                | -                                             |
| CZ&BV | 37 | 11 | 28441766  | 30441766  | 1 | 11-29441766             | -    | -    | Spnb2            | -                                             |
| CZ&BV | 38 | 11 | 46198420  | 47639287  | 1 | 11-46639287             | -    | -    | -                | Sperm head PC1 (44.6-57.3-73.2 Mb)            |
| CZ&BV | 39 | 11 | 73612361  | 75532119  | 1 | 11-74612361             | -    | -    | -                | -                                             |
| CZ&BV | 40 | 11 | 76431151  | 80528556  | 2 | 11-77431151,11-79528556 | -    | -    | -                | -                                             |
| CZ&BV | 41 | 11 | 81647709  | 84521834  | 2 | 11-82647709,11-83521834 | -    | -    | -                | -                                             |
| CZ&BV | 42 | 12 | 69849999  | 71849999  | 1 | 12-70849999             | -    | -    | Atp5s            | -                                             |
| CZ&BV | 43 | 12 | 73069953  | 75069953  | 1 | 12-74069953             | -    | -    | -                | -                                             |
| CZ&BV | 44 | 13 | 27900057  | 29900057  | 1 | 13-28900057             | -    | -    | -                | -                                             |

Supplementary Table 2

|       |    |    |          |          |   |                         |               |                      |                |                                                                                                                                                               |
|-------|----|----|----------|----------|---|-------------------------|---------------|----------------------|----------------|---------------------------------------------------------------------------------------------------------------------------------------------------------------|
| CZ&BV | 45 | 13 | 92983877 | 94983877 | 1 | 13-93983877             | -             | -                    | -              | -                                                                                                                                                             |
| CZ&BV | 46 | 14 | 82308345 | 83828913 | 1 | 14-83308345             | -             | -                    | -              | -                                                                                                                                                             |
| CZ&BV | 47 | 14 | 93730826 | 96297758 | 2 | 14-94730826,14-95297758 | -             | -                    | -              | -                                                                                                                                                             |
| CZ&BV | 48 | 15 | 41990323 | 43990323 | 1 | 15-42990323             | -             | -                    | -              | Total abnormal sperm (16.5-27.1-77.2 Mb),Headless/tailless (16.5-16.5-48.2 Mb),Total abnormal sperm (16.5-32.3-68.7 Mb),Headless/tailless (16.5-16.5-48.2 Mb) |
| CZ&BV | 49 | 16 | 2700097  | 4338117  | 1 | 16-3700097              | -             | -                    | -              | -                                                                                                                                                             |
| CZ&BV | 50 | 16 | 9673724  | 11673724 | 1 | 16-10673724             | -             | -                    | -              | -                                                                                                                                                             |
| CZ&BV | 51 | 16 | 15416923 | 17556714 | 2 | 16-16416923,16-16556714 | -             | -                    | Ube2v2,Ccdc116 | -                                                                                                                                                             |
| CZ&BV | 52 | 16 | 41542464 | 43542464 | 1 | 16-42542464             | -             | -                    | -              | -                                                                                                                                                             |
| CZ&BV | 53 | 16 | 73152290 | 75152290 | 1 | 16-74152290             | -             | -                    | -              | Seminiferous tubule area (66.8-88.2-97.2 Mb)                                                                                                                  |
| CZ&BV | 54 | 17 | 13320574 | 15320574 | 1 | 17-14320574             | -             | -                    | -              | Sperm density (3.1-30-65.2 Mb),Relative testis weight (3.1-57.9-73.2 Mb),Sperm density (3.1-30-64.5 Mb)                                                       |
| CZ&BV | 55 | 17 | 65669344 | 66932862 | 1 | 17-65932862             | -             | -                    | -              | Relative testis weight (3.1-57.9-73.2 Mb)                                                                                                                     |
| CZ&BV | 56 | 18 | 21349665 | 23349665 | 1 | 18-22349665             | -             | -                    | -              | -                                                                                                                                                             |
| CZ&BV | 57 | 18 | 42779798 | 44779798 | 1 | 18-43779798             | Spink3,Spinkl | Spinkl,Spink5,Spink3 | -              | -                                                                                                                                                             |
| CZ&BV | 58 | 19 | 39111518 | 41084697 | 1 | 19-40111518             | -             | -                    | -              | -                                                                                                                                                             |
| CZ&BV | 59 | 19 | 43454439 | 47038714 | 2 | 19-44454439,19-46038714 | -             | -                    | Cwf1911,Cutc   | -                                                                                                                                                             |

Supplementary Table 2

|    |    |   |           |           |   |                                         |          |          |                |                                                                                        |
|----|----|---|-----------|-----------|---|-----------------------------------------|----------|----------|----------------|----------------------------------------------------------------------------------------|
| BV | 1  | 1 | 2218496   | 9343394   | 4 | 1-3218496,1-4679964,1-6622316,1-8343394 | -        | -        | -              | -                                                                                      |
| BV | 2  | 1 | 27291770  | 29291770  | 1 | 1-28291770                              | -        | -        | -              | -                                                                                      |
| BV | 3  | 1 | 53443478  | 55252496  | 1 | 1-54443478                              | -        | -        | -              | -                                                                                      |
| BV | 4  | 1 | 64111919  | 66111919  | 1 | 1-65111919                              | -        | -        | -              | -                                                                                      |
| BV | 5  | 1 | 78219888  | 80219888  | 1 | 1-79219888                              | Serpine2 | Serpine2 | -              | -                                                                                      |
| BV | 6  | 1 | 86570192  | 88355483  | 1 | 1-87570192                              | -        | -        | -              | -                                                                                      |
| BV | 7  | 1 | 90291189  | 92291189  | 1 | 1-91291189                              | -        | -        | -              | -                                                                                      |
| BV | 8  | 1 | 93210207  | 95210207  | 1 | 1-94210207                              | -        | -        | -              | -                                                                                      |
| BV | 9  | 1 | 97298198  | 101323618 | 2 | 1-98298198,1-100323618                  | -        | -        | -              | -                                                                                      |
| BV | 10 | 1 | 107247355 | 109247355 | 1 | 1-108247355                             | -        | -        | -              | -                                                                                      |
| BV | 11 | 1 | 132092315 | 135468242 | 2 | 1-133092315,1-134468242                 | -        | -        | Zp3r(membrane) | -                                                                                      |
| BV | 12 | 1 | 138211342 | 140211342 | 1 | 1-139211342                             | -        | -        | -              | -                                                                                      |
| BV | 13 | 1 | 151195296 | 153195296 | 1 | 1-152195296                             | -        | -        | -              | -                                                                                      |
| BV | 14 | 1 | 166194243 | 168022444 | 1 | 1-167022444                             | -        | -        | -              | -                                                                                      |
| BV | 15 | 2 | 2087705   | 7140329   | 3 | 2-3087705,2-4133690,2-6140329           | -        | -        | -              | -                                                                                      |
| BV | 16 | 2 | 9053633   | 13035156  | 2 | 2-10053633,2-12035156                   | -        | -        | -              | -                                                                                      |
| BV | 17 | 2 | 19519378  | 24730329  | 3 | 2-20519378,2-22485996,2-23730329        | -        | -        | -              | -                                                                                      |
| BV | 18 | 2 | 33033588  | 35033588  | 1 | 2-34033588                              | -        | Hspa5    | Hc             | -                                                                                      |
| BV | 19 | 2 | 73558017  | 75558017  | 1 | 2-74558017                              | -        | -        | -              | Relative testis weight (52.2-105.9-128.5 Mb),Relative testis weight (52.2-96-123.9 Mb) |
| BV | 20 | 2 | 91341483  | 97387284  | 3 | 2-92341483,2-94364908,2-96387284        | -        | -        | -              | Relative testis weight (52.2-96-123.9 Mb),Relative testis weight (52.2-105.9-128.5 Mb) |

Supplementary Table 2

|    |    |   |           |           |   |                                     |   |       |                |                                                                                        |
|----|----|---|-----------|-----------|---|-------------------------------------|---|-------|----------------|----------------------------------------------------------------------------------------|
| BV | 21 | 2 | 102555546 | 108838203 | 3 | 2-103555546,2-105684606,2-107838203 | - | -     | Pdhx           | Relative testis weight (52.2-96-123.9 Mb),Relative testis weight (52.2-105.9-128.5 Mb) |
| BV | 22 | 2 | 114464056 | 119591908 | 3 | 2-115464056,2-117139112,2-118591908 | - | -     | -              | Relative testis weight (52.2-96-123.9 Mb),Relative testis weight (52.2-105.9-128.5 Mb) |
| BV | 23 | 2 | 133892537 | 135892537 | 1 | 2-134892537                         | - | -     | -              | -                                                                                      |
| BV | 24 | 2 | 137841360 | 139841360 | 1 | 2-138841360                         | - | -     | -              | -                                                                                      |
| BV | 25 | 2 | 143088224 | 147686258 | 2 | 2-144088224,2-146686258             | - | -     | -              | -                                                                                      |
| BV | 26 | 2 | 173674207 | 179792933 | 2 | 2-174674207,2-178792933             | - | -     | -              | -                                                                                      |
| BV | 27 | 3 | 33351627  | 35351627  | 1 | 3-34351627                          | - | -     | -              | Distal bent tail (30-51.4-75.9 Mb),Distal bent tail (28.2-54.7-72.1 Mb)                |
| BV | 28 | 3 | 60184383  | 62184383  | 1 | 3-61184383                          | - | -     | -              | Distal bent tail (28.2-54.7-72.1 Mb),Distal bent tail (30-51.4-75.9 Mb)                |
| BV | 29 | 3 | 73249497  | 75249497  | 1 | 3-74249497                          | - | -     | -              | Distal bent tail (30-51.4-75.9 Mb)                                                     |
| BV | 30 | 3 | 82423612  | 88303631  | 3 | 3-83423612,3-85417026,3-87303631    | - | -     | -              | -                                                                                      |
| BV | 31 | 3 | 108059185 | 111509431 | 2 | 3-109059185,3-110509431             | - | Sort1 | -              | -                                                                                      |
| BV | 32 | 3 | 119839910 | 121839910 | 1 | 3-120839910                         | - | -     | -              | Relative testis weight (108.5-129.8-143.7 Mb)                                          |
| BV | 33 | 3 | 127450949 | 129450949 | 1 | 3-128450949                         | - | -     | -              | Relative testis weight (108.5-129.8-143.7 Mb)                                          |
| BV | 34 | 3 | 149119991 | 151119991 | 1 | 3-150119991                         | - | -     | -              | -                                                                                      |
| BV | 35 | 4 | 39288027  | 41142659  | 1 | 4-40288027                          | - | -     | Aqp7(membrane) | -                                                                                      |
| BV | 36 | 4 | 58941702  | 60941702  | 1 | 4-59941702                          | - | -     | -              | -                                                                                      |

Supplementary Table 2

|    |    |   |           |           |   |                                                        |   |   |        |                                                                                                                           |
|----|----|---|-----------|-----------|---|--------------------------------------------------------|---|---|--------|---------------------------------------------------------------------------------------------------------------------------|
| BV | 37 | 4 | 87581941  | 89581941  | 1 | 4-88581941                                             | - | - | -      | -                                                                                                                         |
| BV | 38 | 4 | 95465024  | 97409681  | 1 | 4-96409681                                             | - | - | -      | -                                                                                                                         |
| BV | 39 | 4 | 102390028 | 104156313 | 1 | 4-103390028                                            | - | - | -      | Relative testis weight (98.8-108.9-115.3 Mb),Relative testis weight (98.8-108.9-115.3 Mb)                                 |
| BV | 40 | 4 | 116552547 | 120106544 | 2 | 4-117127746,4-119106544                                | - | - | -      | -                                                                                                                         |
| BV | 41 | 4 | 125511510 | 127511510 | 1 | 4-126511510                                            | - | - | Col8a2 | Relative testis weight (121.8-134.5-148 Mb)                                                                               |
| BV | 42 | 4 | 132547607 | 134547607 | 1 | 4-133547607                                            | - | - | -      | Relative testis weight (121.8-134.5-148 Mb)                                                                               |
| BV | 43 | 4 | 140319248 | 144281847 | 2 | 4-141319248,4-143281847                                | - | - | -      | Relative testis weight (121.8-134.5-148 Mb)                                                                               |
| BV | 44 | 5 | 19496322  | 23530300  | 2 | 5-20496322,5-22530300                                  | - | - | -      | -                                                                                                                         |
| BV | 45 | 5 | 33270952  | 35270952  | 1 | 5-34270952                                             | - | - | -      | -                                                                                                                         |
| BV | 46 | 5 | 45045814  | 54296162  | 5 | 5-46045814,5-47506887,5-49517525,5-51550602,5-53504443 | - | - | -      | -                                                                                                                         |
| BV | 47 | 5 | 56099806  | 58099806  | 1 | 5-57099806                                             | - | - | -      | -                                                                                                                         |
| BV | 48 | 5 | 70595790  | 74538258  | 2 | 5-71595790,5-73538258                                  | - | - | -      | -                                                                                                                         |
| BV | 49 | 5 | 107510292 | 111571863 | 2 | 5-108510292,5-110571863                                | - | - | -      | -                                                                                                                         |
| BV | 50 | 5 | 123549994 | 127503490 | 2 | 5-124549994,5-126503490                                | - | - | -      | Total abnormal sperm (122.4-138.2-148.4 Mb)                                                                               |
| BV | 51 | 5 | 133554863 | 137494041 | 2 | 5-134554863,5-136494041                                | - | - | -      | Distal bent tail (133-146.4-148.4 Mb),Total abnormal sperm (122.4-138.2-148.4 Mb),Distal bent tail (132.2-139.6-148.4 Mb) |

Supplementary Table 2

|    |    |   |           |           |   |                                                                              |          |          |                       |                                                                                                                           |
|----|----|---|-----------|-----------|---|------------------------------------------------------------------------------|----------|----------|-----------------------|---------------------------------------------------------------------------------------------------------------------------|
| BV | 52 | 5 | 138601762 | 141481724 | 2 | 5-139601762,5-140481724                                                      | -        | -        | -                     | Distal bent tail (132.2-139.6-148.4 Mb),Distal bent tail (133-146.4-148.4 Mb),Total abnormal sperm (122.4-138.2-148.4 Mb) |
| BV | 53 | 5 | 147521012 | 149521012 | 1 | 5-148521012                                                                  | -        | -        | -                     | -                                                                                                                         |
| BV | 54 | 6 | 4782646   | 6782646   | 1 | 6-5782646                                                                    | -        | -        | -                     | -                                                                                                                         |
| BV | 55 | 6 | 15485595  | 17261037  | 1 | 6-16485595                                                                   | -        | -        | -                     | -                                                                                                                         |
| BV | 56 | 6 | 48605478  | 52626987  | 2 | 6-49605478,6-51626987                                                        | Svs1     | Svs1     | -                     | -                                                                                                                         |
| BV | 57 | 6 | 58248718  | 60248718  | 1 | 6-59248718                                                                   | -        | -        | Abcg2(membrane)       | -                                                                                                                         |
| BV | 58 | 6 | 63129873  | 66318447  | 2 | 6-64129873,6-65318447                                                        | -        | -        | -                     | -                                                                                                                         |
| BV | 59 | 6 | 69810385  | 73554423  | 2 | 6-70810385,6-72554423                                                        | -        | -        | -                     | -                                                                                                                         |
| BV | 60 | 6 | 75560933  | 79506201  | 2 | 6-76560933,6-78506201                                                        | -        | -        | -                     | -                                                                                                                         |
| BV | 61 | 6 | 81657845  | 83657845  | 1 | 6-82657845                                                                   | -        | -        | -                     | -                                                                                                                         |
| BV | 62 | 6 | 88357069  | 90357069  | 1 | 6-89357069                                                                   | -        | -        | -                     | -                                                                                                                         |
| BV | 63 | 6 | 95866919  | 102642387 | 4 | 6-96866919,6-98793902,6-99656333,6-101642387                                 | -        | -        | -                     | -                                                                                                                         |
| BV | 64 | 6 | 112085013 | 115361266 | 2 | 6-113085013,6-114361266                                                      | -        | -        | -                     | -                                                                                                                         |
| BV | 65 | 7 | 3949736   | 5949736   | 1 | 7-4949736                                                                    | -        | -        | -                     | -                                                                                                                         |
| BV | 66 | 7 | 15643634  | 17643634  | 1 | 7-16643634                                                                   | -        | -        | -                     | Sperm head PC1 (13.7-23.4-44.3 Mb)                                                                                        |
| BV | 67 | 7 | 25013888  | 27013888  | 1 | 7-26013888                                                                   | Ceacam10 | Ceacam10 | Irgc1                 | Sperm head PC1 (13.7-23.4-44.3 Mb)                                                                                        |
| BV | 68 | 7 | 45946267  | 58000026  | 7 | 7-46946267,7-48313230,7-50878487,7-52514458,7-54401984,7-56331327,7-57000026 | -        | Ldha     | Izumo1(membrane),Ldhe | -                                                                                                                         |
| BV | 69 | 7 | 62720387  | 64242187  | 1 | 7-63720387                                                                   | -        | -        | -                     | -                                                                                                                         |

Supplementary Table 2

|    |    |    |           |           |   |                                                        |               |                     |                  |                                               |
|----|----|----|-----------|-----------|---|--------------------------------------------------------|---------------|---------------------|------------------|-----------------------------------------------|
| BV | 70 | 7  | 71376346  | 73376346  | 1 | 7-72376346                                             | -             | -                   | -                | -                                             |
| BV | 71 | 7  | 84220899  | 86220899  | 1 | 7-85220899                                             | -             | -                   | -                | -                                             |
| BV | 72 | 7  | 101127176 | 103127176 | 1 | 7-102127176                                            | -             | -                   | -                | -                                             |
| BV | 73 | 7  | 124557564 | 126557564 | 1 | 7-125557564                                            | -             | -                   | -                | -                                             |
| BV | 74 | 7  | 145596358 | 147596358 | 1 | 7-146596358                                            | -             | -                   | Inpp5a           | -                                             |
| BV | 75 | 8  | 18221075  | 23869624  | 2 | 8-19221075,8-22869624                                  | -             | -                   | -                | -                                             |
| BV | 76 | 8  | 59032680  | 61032680  | 1 | 8-60032680                                             | -             | -                   | -                | Seminiferous tubule area (35.5-87.1-102.7 Mb) |
| BV | 77 | 8  | 69543328  | 71543328  | 1 | 8-70543328                                             | -             | -                   | -                | Seminiferous tubule area (35.5-87.1-102.7 Mb) |
| BV | 78 | 8  | 76982361  | 78982361  | 1 | 8-77982361                                             | -             | -                   | -                | Seminiferous tubule area (35.5-87.1-102.7 Mb) |
| BV | 79 | 8  | 94400455  | 97505302  | 2 | 8-95400455,8-96505302                                  | -             | -                   | -                | Seminiferous tubule area (35.5-87.1-102.7 Mb) |
| BV | 80 | 8  | 103379071 | 105539507 | 2 | 8-104379071,8-104539507                                | -             | -                   | -                | -                                             |
| BV | 81 | 8  | 109224009 | 111224009 | 1 | 8-110224009                                            | -             | -                   | -                | -                                             |
| BV | 82 | 9  | 7922218   | 9922218   | 1 | 9-8922218                                              | -             | -                   | -                | -                                             |
| BV | 83 | 9  | 20630492  | 22630492  | 1 | 9-21630492                                             | -             | -                   | -                | -                                             |
| BV | 84 | 9  | 26442920  | 35771574  | 5 | 9-27333744,9-29019307,9-30525379,9-32550236,9-34771574 | D730048I06Rik | Pate4,D730048I06Rik | -                | -                                             |
| BV | 85 | 9  | 36667119  | 38413337  | 1 | 9-37413337                                             | -             | -                   | -                | -                                             |
| BV | 86 | 9  | 46545966  | 48545966  | 1 | 9-47545966                                             | -             | -                   | -                | -                                             |
| BV | 87 | 9  | 52503741  | 56473020  | 2 | 9-53503741,9-55473020                                  | -             | -                   | -                | -                                             |
| BV | 88 | 9  | 80504278  | 82504278  | 1 | 9-81504278                                             | -             | -                   | -                | -                                             |
| BV | 89 | 9  | 92449909  | 96750430  | 3 | 9-93449909,9-93958617,9-95750430                       | -             | -                   | Atp1b3(membrane) | -                                             |
| BV | 90 | 9  | 102141047 | 104141047 | 1 | 9-103141047                                            | -             | -                   | Trf              | -                                             |
| BV | 91 | 10 | 8392633   | 10392633  | 1 | 10-9392633                                             | -             | -                   | -                | -                                             |



Supplementary Table 2

|    |     |    |           |           |   |                         |      |   |          |                                                                                                                                                                     |
|----|-----|----|-----------|-----------|---|-------------------------|------|---|----------|---------------------------------------------------------------------------------------------------------------------------------------------------------------------|
| BV | 92  | 10 | 12528165  | 16492552  | 2 | 10-13528165,10-15492552 | -    | - | -        | -                                                                                                                                                                   |
| BV | 93  | 10 | 60567285  | 64325189  | 2 | 10-61567285,10-63447082 | -    | - | Hk1      | Relative testis weight (51.3-72.2-82.7 Mb),Proximal bent tail (34.5-51.3-87.4 Mb),Relative testis weight (55.1-69.3-87.4 Mb),Proximal bent tail (32.6-47.6-84.3 Mb) |
| BV | 94  | 10 | 65015642  | 66517763  | 1 | 10-66015642             | -    | - | -        | Proximal bent tail (34.5-51.3-87.4 Mb),Relative testis weight (55.1-69.3-87.4 Mb),Proximal bent tail (32.6-47.6-84.3 Mb),Relative testis weight (51.3-72.2-82.7 Mb) |
| BV | 95  | 10 | 79265834  | 81265834  | 1 | 10-80265834             | -    | - | BC005764 | Relative testis weight (55.1-69.3-87.4 Mb),Proximal bent tail (32.6-47.6-84.3 Mb),Relative testis weight (51.3-72.2-82.7 Mb),Proximal bent tail (34.5-51.3-87.4 Mb) |
| BV | 96  | 10 | 84145548  | 89003532  | 2 | 10-84461800,10-88003532 | -    | - | -        | -                                                                                                                                                                   |
| BV | 97  | 10 | 95534734  | 97534734  | 1 | 10-96534734             | -    | - | -        | -                                                                                                                                                                   |
| BV | 98  | 10 | 102600049 | 104600049 | 1 | 10-103600049            | -    | - | -        | -                                                                                                                                                                   |
| BV | 99  | 10 | 119494102 | 121237791 | 1 | 10-120494102            | -    | - | -        | -                                                                                                                                                                   |
| BV | 100 | 10 | 122052771 | 124052771 | 1 | 10-123052771            | -    | - | -        | -                                                                                                                                                                   |
| BV | 101 | 10 | 128370924 | 129936701 | 1 | 10-129370924            | -    | - | -        | -                                                                                                                                                                   |
| BV | 102 | 11 | 3550977   | 5443394   | 1 | 11-4550977              | Tcn2 | - | -        | -                                                                                                                                                                   |
| BV | 103 | 11 | 8117435   | 10117435  | 1 | 11-9117435              | -    | - | -        | -                                                                                                                                                                   |
| BV | 104 | 11 | 12072486  | 14072486  | 1 | 11-13072486             | -    | - | -        | -                                                                                                                                                                   |
| BV | 105 | 11 | 17557462  | 19557462  | 1 | 11-18557462             | -    | - | -        | -                                                                                                                                                                   |

Supplementary Table 2

|    |     |    |           |           |   |                                                             |   |      |           |                                       |
|----|-----|----|-----------|-----------|---|-------------------------------------------------------------|---|------|-----------|---------------------------------------|
| BV | 106 | 11 | 20494884  | 24356000  | 2 | 11-21018456,11-23356000                                     | - | Mdh1 | -         | -                                     |
| BV | 107 | 11 | 25179507  | 26557146  | 1 | 11-25557146                                                 | - | -    | -         | -                                     |
| BV | 108 | 11 | 28441766  | 30441766  | 1 | 11-29441766                                                 | - | -    | Spnb2     | -                                     |
| BV | 109 | 11 | 43548099  | 45548099  | 1 | 11-44548099                                                 | - | -    | -         | -                                     |
| BV | 110 | 11 | 46198420  | 47639287  | 1 | 11-46639287                                                 | - | -    | -         | Sperm head PC1<br>(44.6-57.3-73.2 Mb) |
| BV | 111 | 11 | 65359051  | 67359051  | 1 | 11-66359051                                                 | - | -    | -         | Sperm head PC1<br>(44.6-57.3-73.2 Mb) |
| BV | 112 | 11 | 71600158  | 80528556  | 5 | 11-72600158,11-74612361,11-75532119,11-77431151,11-79528556 | - | -    | -         | -                                     |
| BV | 113 | 11 | 81647709  | 84521834  | 2 | 11-82647709,11-83521834                                     | - | -    | -         | -                                     |
| BV | 114 | 11 | 113138441 | 114735409 | 1 | 11-114138441                                                | - | -    | D11Wsu47e | -                                     |
| BV | 115 | 12 | 52481717  | 54481717  | 1 | 12-53481717                                                 | - | -    | -         | -                                     |
| BV | 116 | 12 | 57123595  | 60624457  | 2 | 12-57869231,12-59624457                                     | - | -    | -         | -                                     |
| BV | 117 | 12 | 69849999  | 71849999  | 1 | 12-70849999                                                 | - | -    | Atp5s     | -                                     |
| BV | 118 | 12 | 73069953  | 75069953  | 1 | 12-74069953                                                 | - | -    | -         | -                                     |
| BV | 119 | 12 | 76963781  | 78963781  | 1 | 12-77963781                                                 | - | -    | -         | -                                     |
| BV | 120 | 12 | 87371194  | 89371194  | 1 | 12-88371194                                                 | - | -    | -         | -                                     |
| BV | 121 | 13 | 27900057  | 29900057  | 1 | 13-28900057                                                 | - | -    | -         | -                                     |
| BV | 122 | 13 | 43636064  | 48731379  | 2 | 13-44636064,13-47731379                                     | - | -    | -         | -                                     |
| BV | 123 | 13 | 58009782  | 63310410  | 3 | 13-59009782,13-60981019,13-62310410                         | - | -    | -         | -                                     |
| BV | 124 | 13 | 92983877  | 94983877  | 1 | 13-93983877                                                 | - | -    | -         | -                                     |
| BV | 125 | 13 | 98735240  | 100735240 | 1 | 13-99735240                                                 | - | -    | -         | -                                     |
| BV | 126 | 13 | 103456553 | 105456553 | 1 | 13-104456553                                                | - | -    | -         | -                                     |

Supplementary Table 2

|    |     |    |           |           |   |                                                 |   |   |       |                                                                                                                                                               |
|----|-----|----|-----------|-----------|---|-------------------------------------------------|---|---|-------|---------------------------------------------------------------------------------------------------------------------------------------------------------------|
| BV | 127 | 13 | 109112000 | 112651504 | 2 | 13-110112000,13-111651504                       | - | - | -     | -                                                                                                                                                             |
| BV | 128 | 14 | 9740076   | 11315439  | 1 | 14-10740076                                     | - | - | -     | -                                                                                                                                                             |
| BV | 129 | 14 | 12212702  | 14212702  | 1 | 14-13212702                                     | - | - | -     | -                                                                                                                                                             |
| BV | 130 | 14 | 22505529  | 29500123  | 4 | 14-23505529,14-25420869,14-27478740,14-28585923 | - | - | Vdac2 | -                                                                                                                                                             |
| BV | 131 | 14 | 40516626  | 42516626  | 1 | 14-41516626                                     | - | - | -     | Seminiferous tubule area (25.6-61.6-63.2 Mb)                                                                                                                  |
| BV | 132 | 14 | 46551836  | 48311055  | 1 | 14-47551836                                     | - | - | -     | Seminiferous tubule area (25.6-61.6-63.2 Mb)                                                                                                                  |
| BV | 133 | 14 | 54715750  | 56715750  | 1 | 14-55715750                                     | - | - | -     | Seminiferous tubule area (25.6-61.6-63.2 Mb)                                                                                                                  |
| BV | 134 | 14 | 57920809  | 59920809  | 1 | 14-58920809                                     | - | - | -     | Seminiferous tubule area (25.6-61.6-63.2 Mb)                                                                                                                  |
| BV | 135 | 14 | 61231548  | 63231548  | 1 | 14-62231548                                     | - | - | -     | -                                                                                                                                                             |
| BV | 136 | 14 | 82308345  | 83828913  | 1 | 14-83308345                                     | - | - | -     | -                                                                                                                                                             |
| BV | 137 | 14 | 93730826  | 96297758  | 2 | 14-94730826,14-95297758                         | - | - | -     | -                                                                                                                                                             |
| BV | 138 | 15 | 4014503   | 5570988   | 1 | 15-5014503                                      | - | - | -     | -                                                                                                                                                             |
| BV | 139 | 15 | 41990323  | 43990323  | 1 | 15-42990323                                     | - | - | -     | Headless/tailless (16.5-16.5-48.2 Mb),Total abnormal sperm (16.5-27.1-77.2 Mb),Headless/tailless (16.5-16.5-48.2 Mb),Total abnormal sperm (16.5-32.3-68.7 Mb) |
| BV | 140 | 15 | 49516612  | 51516612  | 1 | 15-50516612                                     | - | - | -     | Total abnormal sperm (16.5-27.1-77.2 Mb),Total abnormal sperm (16.5-32.3-68.7 Mb)                                                                             |

Supplementary Table 2

|    |     |    |          |          |   |                                     |   |   |                |                                                                                                         |
|----|-----|----|----------|----------|---|-------------------------------------|---|---|----------------|---------------------------------------------------------------------------------------------------------|
| BV | 141 | 16 | 2700097  | 5338117  | 2 | 16-3700097,16-4338117               | - | - | -              | -                                                                                                       |
| BV | 142 | 16 | 9673724  | 11673724 | 1 | 16-10673724                         | - | - | -              | -                                                                                                       |
| BV | 143 | 16 | 15416923 | 17556714 | 2 | 16-16416923,16-16556714             | - | - | Ube2v2,Ccdc116 | -                                                                                                       |
| BV | 144 | 16 | 41542464 | 46334403 | 3 | 16-42542464,16-44238674,16-46185073 | - | - | -              | -                                                                                                       |
| BV | 145 | 16 | 57680765 | 59680765 | 1 | 16-58680765                         | - | - | -              | -                                                                                                       |
| BV | 146 | 16 | 73152290 | 75152290 | 1 | 16-74152290                         | - | - | -              | Seminiferous tubule area (66.8-88.2-97.2 Mb)                                                            |
| BV | 147 | 16 | 76126395 | 77358628 | 1 | 16-76358628                         | - | - | -              | Seminiferous tubule area (66.8-88.2-97.2 Mb)                                                            |
| BV | 148 | 17 | 13320574 | 15320574 | 1 | 17-14320574                         | - | - | -              | Relative testis weight (3.1-57.9-73.2 Mb),Sperm density (3.1-30-64.5 Mb),Sperm density (3.1-30-65.2 Mb) |
| BV | 149 | 17 | 29215665 | 31215665 | 1 | 17-30215665                         | - | - | -              | Sperm density (3.1-30-65.2 Mb),Relative testis weight (3.1-57.9-73.2 Mb),Sperm density (3.1-30-64.5 Mb) |
| BV | 150 | 17 | 55326632 | 57326632 | 1 | 17-56326632                         | - | - | -              | Sperm density (3.1-30-65.2 Mb),Relative testis weight (3.1-57.9-73.2 Mb),Sperm density (3.1-30-64.5 Mb) |
| BV | 151 | 17 | 62922798 | 64922798 | 1 | 17-63922798                         | - | - | -              | Sperm density (3.1-30-65.2 Mb),Relative testis weight (3.1-57.9-73.2 Mb)                                |

Supplementary Table 2

|    |     |    |           |           |   |                                     |               |                      |              |                                                                                       |
|----|-----|----|-----------|-----------|---|-------------------------------------|---------------|----------------------|--------------|---------------------------------------------------------------------------------------|
| BV | 152 | 17 | 65669344  | 66932862  | 1 | 17-65932862                         | -             | -                    | -            | Relative testis weight (3.1-57.9-73.2 Mb)                                             |
| BV | 153 | 18 | 21349665  | 23349665  | 1 | 18-22349665                         | -             | -                    | -            | -                                                                                     |
| BV | 154 | 18 | 27026161  | 29026161  | 1 | 18-28026161                         | -             | -                    | -            | -                                                                                     |
| BV | 155 | 18 | 31000740  | 35513358  | 3 | 18-32000740,18-32504903,18-34513358 | -             | -                    | -            | -                                                                                     |
| BV | 156 | 18 | 42779798  | 44779798  | 1 | 18-43779798                         | Spink3,Spinkl | Spink3,Spinkl,Spink5 | -            | -                                                                                     |
| BV | 157 | 18 | 54016148  | 56016148  | 1 | 18-55016148                         | -             | -                    | -            | -                                                                                     |
| BV | 158 | 18 | 60012852  | 62012852  | 1 | 18-61012852                         | -             | -                    | -            | Seminiferous tubule area (58-68.5-78.1 Mb)                                            |
| BV | 159 | 18 | 71148938  | 74890844  | 2 | 18-72063177,18-73890844             | -             | -                    | Ccdc11       | Seminiferous tubule area (60.3-69.6-80 Mb),Seminiferous tubule area (58-68.5-78.1 Mb) |
| BV | 160 | 19 | 24023055  | 26023055  | 1 | 19-25023055                         | -             | -                    | -            | -                                                                                     |
| BV | 161 | 19 | 30060431  | 32060431  | 1 | 19-31060431                         | -             | -                    | -            | -                                                                                     |
| BV | 162 | 19 | 39111518  | 41084697  | 1 | 19-40111518                         | -             | -                    | -            | -                                                                                     |
| BV | 163 | 19 | 43454439  | 47038714  | 2 | 19-44454439,19-46038714             | -             | -                    | Cwf1911,Cutc | -                                                                                     |
| CZ | 1   | 1  | 2218496   | 4218496   | 1 | 1-3218496                           | -             | -                    | -            | -                                                                                     |
| CZ | 2   | 1  | 26043291  | 29291770  | 2 | 1-27043291,1-28291770               | -             | -                    | -            | -                                                                                     |
| CZ | 3   | 1  | 37523662  | 41488424  | 2 | 1-38523662,1-40488424               | -             | -                    | -            | -                                                                                     |
| CZ | 4   | 1  | 78219888  | 80219888  | 1 | 1-79219888                          | Serpine2      | Serpine2             | -            | -                                                                                     |
| CZ | 5   | 1  | 114414966 | 116414966 | 1 | 1-115414966                         | -             | -                    | -            | -                                                                                     |
| CZ | 6   | 1  | 128191266 | 130191266 | 1 | 1-129191266                         | -             | -                    | -            | -                                                                                     |
| CZ | 7   | 1  | 135251828 | 137251828 | 1 | 1-136251828                         | -             | -                    | -            | -                                                                                     |
| CZ | 8   | 1  | 148168925 | 150168925 | 1 | 1-149168925                         | -             | -                    | -            | -                                                                                     |
| CZ | 9   | 1  | 159226965 | 161226965 | 1 | 1-160226965                         | -             | -                    | -            | -                                                                                     |

Supplementary Table 2

|    |    |   |           |           |   |                                                             |                                 |                                       |            |                                                                                        |
|----|----|---|-----------|-----------|---|-------------------------------------------------------------|---------------------------------|---------------------------------------|------------|----------------------------------------------------------------------------------------|
| CZ | 10 | 1 | 177487255 | 186387697 | 5 | 1-178487255,1-180238329,1-182194280,1-184117310,1-185387697 | -                               | -                                     | Enah,Wdr64 | -                                                                                      |
| CZ | 11 | 2 | 7025133   | 11053633  | 2 | 2-8025133,2-10053633                                        | -                               | -                                     | -          | -                                                                                      |
| CZ | 12 | 2 | 13070846  | 18265394  | 3 | 2-14070846,2-16043636,2-17265394                            | -                               | -                                     | -          | -                                                                                      |
| CZ | 13 | 2 | 25561347  | 29258366  | 2 | 2-26252845,2-28258366                                       | -                               | -                                     | -          | -                                                                                      |
| CZ | 14 | 2 | 33033588  | 35033588  | 1 | 2-34033588                                                  | -                               | Hspa5                                 | Hc         | -                                                                                      |
| CZ | 15 | 2 | 37309370  | 39309370  | 1 | 2-38309370                                                  | -                               | -                                     | -          | -                                                                                      |
| CZ | 16 | 2 | 45329597  | 47329597  | 1 | 2-46329597                                                  | -                               | -                                     | -          | -                                                                                      |
| CZ | 17 | 2 | 65805958  | 67805958  | 1 | 2-66805958                                                  | -                               | -                                     | -          | Relative testis weight (52.2-105.9-128.5 Mb),Relative testis weight (52.2-96-123.9 Mb) |
| CZ | 18 | 2 | 71575844  | 75558017  | 2 | 2-72575844,2-74558017                                       | -                               | -                                     | -          | Relative testis weight (52.2-96-123.9 Mb),Relative testis weight (52.2-105.9-128.5 Mb) |
| CZ | 19 | 2 | 101017952 | 103017952 | 1 | 2-102017952                                                 | -                               | -                                     | Pdhx       | Relative testis weight (52.2-96-123.9 Mb),Relative testis weight (52.2-105.9-128.5 Mb) |
| CZ | 20 | 2 | 117591908 | 121593238 | 2 | 2-118591908,2-120593238                                     | -                               | -                                     | -          | Relative testis weight (52.2-96-123.9 Mb),Relative testis weight (52.2-105.9-128.5 Mb) |
| CZ | 21 | 2 | 123615974 | 125615974 | 1 | 2-124615974                                                 | -                               | -                                     | -          | Relative testis weight (52.2-105.9-128.5 Mb)                                           |
| CZ | 22 | 2 | 127899009 | 129899009 | 1 | 2-128899009                                                 | -                               | -                                     | -          | -                                                                                      |
| CZ | 23 | 2 | 132609716 | 134429022 | 1 | 2-133429022                                                 | -                               | -                                     | -          | -                                                                                      |
| CZ | 24 | 2 | 145686258 | 147686258 | 1 | 2-146686258                                                 | -                               | -                                     | -          | -                                                                                      |
| CZ | 25 | 2 | 163257865 | 165257865 | 1 | 2-164257865                                                 | Svs6,Svs3a,Svs5,Svs2,Svs3b,Svs4 | Svs4,Svs6,Svs3a,Svs5,Svs2,Svs3b,Wfdc3 | -          | -                                                                                      |

Supplementary Table 2

|    |    |   |           |           |   |                                     |   |   |                  |                                                                                           |
|----|----|---|-----------|-----------|---|-------------------------------------|---|---|------------------|-------------------------------------------------------------------------------------------|
| CZ | 26 | 2 | 173674207 | 179792933 | 2 | 2-174674207,2-178792933             | - | - | -                | -                                                                                         |
| CZ | 27 | 3 | 5367208   | 8984156   | 2 | 3-6008035,3-7984156                 | - | - | -                | -                                                                                         |
| CZ | 28 | 3 | 47314708  | 49314708  | 1 | 3-48314708                          | - | - | -                | Distal bent tail (30-51.4-75.9 Mb),Distal bent tail (28.2-54.7-72.1 Mb)                   |
| CZ | 29 | 3 | 73249497  | 75249497  | 1 | 3-74249497                          | - | - | -                | Distal bent tail (30-51.4-75.9 Mb)                                                        |
| CZ | 30 | 3 | 88085477  | 90085477  | 1 | 3-89085477                          | - | - | Tpm3             | -                                                                                         |
| CZ | 31 | 3 | 94264590  | 97370325  | 2 | 3-95264590,3-96370325               | - | - | -                | -                                                                                         |
| CZ | 32 | 3 | 115449736 | 120018491 | 3 | 3-116449736,3-118409193,3-119018491 | - | - | -                | Relative testis weight (108.5-129.8-143.7 Mb)                                             |
| CZ | 33 | 3 | 135819286 | 137819286 | 1 | 3-136819286                         | - | - | -                | Relative testis weight (108.5-129.8-143.7 Mb)                                             |
| CZ | 34 | 3 | 151076095 | 153076095 | 1 | 3-152076095                         | - | - | -                | -                                                                                         |
| CZ | 35 | 3 | 155139240 | 157139240 | 1 | 3-156139240                         | - | - | -                | -                                                                                         |
| CZ | 36 | 4 | 10129686  | 13006792  | 2 | 4-11129686,4-12006792               | - | - | -                | -                                                                                         |
| CZ | 37 | 4 | 30381321  | 35455525  | 2 | 4-31381321,4-34455525               | - | - | Spaca1(membrane) | -                                                                                         |
| CZ | 38 | 4 | 35988631  | 37988631  | 1 | 4-36988631                          | - | - | -                | -                                                                                         |
| CZ | 39 | 4 | 45588937  | 47358721  | 1 | 4-46358721                          | - | - | -                | -                                                                                         |
| CZ | 40 | 4 | 67501467  | 69501467  | 1 | 4-68501467                          | - | - | -                | -                                                                                         |
| CZ | 41 | 4 | 78705798  | 80705798  | 1 | 4-79705798                          | - | - | -                | -                                                                                         |
| CZ | 42 | 4 | 86359241  | 88359241  | 1 | 4-87359241                          | - | - | -                | -                                                                                         |
| CZ | 43 | 4 | 88968152  | 90968152  | 1 | 4-89968152                          | - | - | -                | -                                                                                         |
| CZ | 44 | 4 | 92815070  | 96409681  | 2 | 4-93815070,4-95465024               | - | - | -                | -                                                                                         |
| CZ | 45 | 4 | 96553412  | 98553412  | 1 | 4-97553412                          | - | - | -                | -                                                                                         |
| CZ | 46 | 4 | 102390028 | 104156313 | 1 | 4-103390028                         | - | - | -                | Relative testis weight (98.8-108.9-115.3 Mb),Relative testis weight (98.8-108.9-115.3 Mb) |

Supplementary Table 2

|    |    |   |           |           |   |                                                        |   |          |               |                                                                                           |
|----|----|---|-----------|-----------|---|--------------------------------------------------------|---|----------|---------------|-------------------------------------------------------------------------------------------|
| CZ | 47 | 4 | 106325908 | 110154216 | 2 | 4-107325908,4-109154216                                | - | -        | -             | Relative testis weight (98.8-108.9-115.3 Mb),Relative testis weight (98.8-108.9-115.3 Mb) |
| CZ | 48 | 4 | 113215469 | 118127746 | 4 | 4-114215469,4-114754817,4-116552547,4-117127746        | - | Prdx1    | -             | -                                                                                         |
| CZ | 49 | 4 | 129261463 | 133025536 | 2 | 4-130261463,4-132025536                                | - | -        | Mecr          | Relative testis weight (121.8-134.5-148 Mb)                                               |
| CZ | 50 | 4 | 134586011 | 136586011 | 1 | 4-135586011                                            | - | -        | -             | Relative testis weight (121.8-134.5-148 Mb)                                               |
| CZ | 51 | 4 | 147148701 | 149148701 | 1 | 4-148148701                                            | - | -        | -             | -                                                                                         |
| CZ | 52 | 5 | 9676168   | 15510561  | 3 | 5-10676168,5-12551988,5-14510561                       | - | -        | -             | -                                                                                         |
| CZ | 53 | 5 | 19496322  | 21496322  | 1 | 5-20496322                                             | - | -        | -             | -                                                                                         |
| CZ | 54 | 5 | 39571420  | 41571420  | 1 | 5-40571420                                             | - | -        | -             | -                                                                                         |
| CZ | 55 | 5 | 50550602  | 52550602  | 1 | 5-51550602                                             | - | -        | -             | -                                                                                         |
| CZ | 56 | 5 | 65329275  | 67329275  | 1 | 5-66329275                                             | - | -        | -             | -                                                                                         |
| CZ | 57 | 5 | 68791826  | 74538258  | 3 | 5-69791826,5-71595790,5-73538258                       | - | -        | -             | -                                                                                         |
| CZ | 58 | 5 | 76511043  | 78511043  | 1 | 5-77511043                                             | - | -        | 1700023E05Rik | -                                                                                         |
| CZ | 59 | 5 | 81774405  | 83774405  | 1 | 5-82774405                                             | - | -        | -             | -                                                                                         |
| CZ | 60 | 5 | 84036252  | 92942191  | 5 | 5-85036252,5-87516106,5-89553700,5-90191248,5-91942191 | - | Smr2,Alb | -             | -                                                                                         |
| CZ | 61 | 5 | 95311622  | 97164116  | 1 | 5-96311622                                             | - | -        | -             | -                                                                                         |
| CZ | 62 | 5 | 97606521  | 99606521  | 1 | 5-98606521                                             | - | -        | -             | -                                                                                         |
| CZ | 63 | 5 | 107510292 | 111571863 | 2 | 5-108510292,5-110571863                                | - | -        | -             | -                                                                                         |
| CZ | 64 | 5 | 117509093 | 121545466 | 2 | 5-118509093,5-120545466                                | - | -        | -             | -                                                                                         |



Supplementary Table 2

|    |    |   |           |           |   |                                             |      |         |   |                                                                                                                           |
|----|----|---|-----------|-----------|---|---------------------------------------------|------|---------|---|---------------------------------------------------------------------------------------------------------------------------|
| CZ | 65 | 5 | 138601762 | 140481724 | 1 | 5-139601762                                 | -    | -       | - | Total abnormal sperm (122.4-138.2-148.4 Mb),Distal bent tail (132.2-139.6-148.4 Mb),Distal bent tail (133-146.4-148.4 Mb) |
| CZ | 66 | 5 | 141522384 | 143522384 | 1 | 5-142522384                                 | -    | -       | - | Distal bent tail (133-146.4-148.4 Mb),Total abnormal sperm (122.4-138.2-148.4 Mb),Distal bent tail (132.2-139.6-148.4 Mb) |
| CZ | 67 | 6 | 4782646   | 9911899   | 2 | 6-5782646,6-8911899                         | -    | -       | - | -                                                                                                                         |
| CZ | 68 | 6 | 15485595  | 17261037  | 1 | 6-16485595                                  | -    | -       | - | -                                                                                                                         |
| CZ | 69 | 6 | 27407372  | 29407372  | 1 | 6-28407372                                  | -    | -       | - | -                                                                                                                         |
| CZ | 70 | 6 | 30144816  | 32144816  | 1 | 6-31144816                                  | -    | -       | - | -                                                                                                                         |
| CZ | 71 | 6 | 42500404  | 44500404  | 1 | 6-43500404                                  | -    | Fam115e | - | -                                                                                                                         |
| CZ | 72 | 6 | 48605478  | 50605478  | 1 | 6-49605478                                  | Svs1 | Svs1    | - | -                                                                                                                         |
| CZ | 73 | 6 | 61118351  | 63118351  | 1 | 6-62118351                                  | -    | -       | - | -                                                                                                                         |
| CZ | 74 | 6 | 66319392  | 75564086  | 4 | 6-67319392,6-70810385,6-72554423,6-74564086 | -    | -       | - | -                                                                                                                         |
| CZ | 75 | 6 | 77506201  | 79506201  | 1 | 6-78506201                                  | -    | -       | - | -                                                                                                                         |
| CZ | 76 | 6 | 81657845  | 86479596  | 3 | 6-82657845,6-84399217,6-85479596            | -    | -       | - | -                                                                                                                         |
| CZ | 77 | 6 | 97793902  | 99656333  | 1 | 6-98793902                                  | -    | -       | - | -                                                                                                                         |
| CZ | 78 | 6 | 106506062 | 108487826 | 1 | 6-107506062                                 | -    | -       | - | -                                                                                                                         |
| CZ | 79 | 6 | 119675321 | 121675321 | 1 | 6-120675321                                 | -    | -       | - | -                                                                                                                         |
| CZ | 80 | 6 | 139586186 | 143349146 | 2 | 6-140586186,6-142510257                     | -    | -       | - | -                                                                                                                         |
| CZ | 81 | 6 | 146621604 | 148621604 | 1 | 6-147621604                                 | -    | -       | - | -                                                                                                                         |
| CZ | 82 | 7 | 12536085  | 14536085  | 1 | 7-13536085                                  | -    | -       | - | -                                                                                                                         |
| CZ | 83 | 7 | 15643634  | 17643634  | 1 | 7-16643634                                  | -    | -       | - | Sperm head PC1 (13.7-23.4-44.3 Mb)                                                                                        |

Supplementary Table 2

|    |     |   |           |           |   |                                  |   |                     |                |                                               |
|----|-----|---|-----------|-----------|---|----------------------------------|---|---------------------|----------------|-----------------------------------------------|
| CZ | 84  | 7 | 26171639  | 29099419  | 2 | 7-27171639,7-28099419            | - | Fcgbp,9530053A07Rik | BC089491       | Sperm head PC1 (13.7-23.4-44.3 Mb)            |
| CZ | 85  | 7 | 29506574  | 31506574  | 1 | 7-30506574                       | - | -                   | -              | Sperm head PC1 (13.7-23.4-44.3 Mb)            |
| CZ | 86  | 7 | 63720387  | 69479053  | 3 | 7-64242187,7-65971622,7-68479053 | - | -                   | -              | -                                             |
| CZ | 87  | 7 | 77430322  | 79430322  | 1 | 7-78430322                       | - | -                   | -              | -                                             |
| CZ | 88  | 7 | 81671859  | 83287792  | 1 | 7-82671859                       | - | -                   | -              | -                                             |
| CZ | 89  | 7 | 87488422  | 91747215  | 3 | 7-88488422,7-89104160,7-90747215 | - | -                   | -              | -                                             |
| CZ | 90  | 7 | 95067954  | 97067954  | 1 | 7-96067954                       | - | -                   | -              | -                                             |
| CZ | 91  | 7 | 99739166  | 101739166 | 1 | 7-100739166                      | - | -                   | Prpc(membrane) | -                                             |
| CZ | 92  | 7 | 104339628 | 107735324 | 2 | 7-105339628,7-106735324          | - | -                   | Ndufc2         | -                                             |
| CZ | 93  | 7 | 118929024 | 120929024 | 1 | 7-119929024                      | - | -                   | -              | -                                             |
| CZ | 94  | 8 | 2269498   | 4269498   | 1 | 8-3269498                        | - | -                   | -              | -                                             |
| CZ | 95  | 8 | 23509920  | 27510733  | 2 | 8-24509920,8-26510733            | - | -                   | -              | -                                             |
| CZ | 96  | 8 | 31772567  | 35514059  | 2 | 8-32772567,8-34514059            | - | -                   | -              | -                                             |
| CZ | 97  | 8 | 37455948  | 39455948  | 1 | 8-38455948                       | - | -                   | -              | Seminiferous tubule area (35.5-87.1-102.7 Mb) |
| CZ | 98  | 8 | 43526091  | 45526091  | 1 | 8-44526091                       | - | -                   | -              | Seminiferous tubule area (35.5-87.1-102.7 Mb) |
| CZ | 99  | 8 | 50765380  | 53571355  | 2 | 8-51765380,8-52571355            | - | -                   | -              | Seminiferous tubule area (35.5-87.1-102.7 Mb) |
| CZ | 100 | 8 | 55103008  | 59204429  | 2 | 8-56103008,8-58204429            | - | -                   | -              | Seminiferous tubule area (35.5-87.1-102.7 Mb) |
| CZ | 101 | 8 | 75665926  | 78982361  | 2 | 8-76665926,8-77982361            | - | -                   | -              | Seminiferous tubule area (35.5-87.1-102.7 Mb) |
| CZ | 102 | 8 | 80514333  | 86491405  | 3 | 8-81514333,8-83519574,8-85491405 | - | -                   | -              | Seminiferous tubule area (35.5-87.1-102.7 Mb) |

Supplementary Table 2

|    |     |    |           |           |   |                                             |   |       |                  |                                                                                                                          |
|----|-----|----|-----------|-----------|---|---------------------------------------------|---|-------|------------------|--------------------------------------------------------------------------------------------------------------------------|
| CZ | 103 | 8  | 94400455  | 97505302  | 2 | 8-95400455,8-96505302                       | - | -     | -                | Seminiferous tubule area (35.5-87.1-102.7 Mb)                                                                            |
| CZ | 104 | 8  | 99375992  | 101803910 | 2 | 8-100375992,8-100803910                     | - | -     | -                | Seminiferous tubule area (35.5-87.1-102.7 Mb)                                                                            |
| CZ | 105 | 8  | 113503485 | 115503485 | 1 | 8-114503485                                 | - | -     | -                | -                                                                                                                        |
| CZ | 106 | 8  | 117510594 | 119510594 | 1 | 8-118510594                                 | - | -     | -                | -                                                                                                                        |
| CZ | 107 | 8  | 128579589 | 130579589 | 1 | 8-129579589                                 | - | -     | -                | -                                                                                                                        |
| CZ | 108 | 9  | 9686501   | 11686501  | 1 | 9-10686501                                  | - | -     | -                | -                                                                                                                        |
| CZ | 109 | 9  | 23421212  | 25922838  | 2 | 9-24421212,9-24922838                       | - | -     | -                | -                                                                                                                        |
| CZ | 110 | 9  | 28019307  | 30019307  | 1 | 9-29019307                                  | - | -     | -                | -                                                                                                                        |
| CZ | 111 | 9  | 61502750  | 63502750  | 1 | 9-62502750                                  | - | -     | -                | -                                                                                                                        |
| CZ | 112 | 9  | 67092672  | 73019668  | 4 | 9-68092672,9-68511431,9-70486191,9-72019668 | - | -     | -                | -                                                                                                                        |
| CZ | 113 | 9  | 90474245  | 92474245  | 1 | 9-91474245                                  | - | -     | -                | -                                                                                                                        |
| CZ | 114 | 9  | 94750430  | 96750430  | 1 | 9-95750430                                  | - | -     | Atp1b3(membrane) | -                                                                                                                        |
| CZ | 115 | 10 | 3943931   | 6236376   | 2 | 10-4943931,10-5236376                       | - | -     | -                | -                                                                                                                        |
| CZ | 116 | 10 | 11131902  | 12888659  | 1 | 10-11888659                                 | - | -     | -                | -                                                                                                                        |
| CZ | 117 | 10 | 14492552  | 18316397  | 2 | 10-15492552,10-17316397                     | - | -     | -                | -                                                                                                                        |
| CZ | 118 | 10 | 29508837  | 35051817  | 3 | 10-30508837,10-32189392,10-34051817         | - | -     | -                | -                                                                                                                        |
| CZ | 119 | 10 | 51599256  | 55554213  | 2 | 10-52599256,10-54554213                     | - | Man1a | -                | Proximal bent tail (32.6-47.6-84.3 Mb),Relative testis weight (51.3-72.2-82.7 Mb),Proximal bent tail (34.5-51.3-87.4 Mb) |
| CZ | 120 | 10 | 83145548  | 84461800  | 1 | 10-84145548                                 | - | -     | -                | Relative testis weight (55.1-69.3-87.4 Mb),Proximal bent tail (34.5-51.3-87.4 Mb)                                        |

Supplementary Table 2

|    |     |    |           |           |   |                                                                         |      |   |                |                                       |
|----|-----|----|-----------|-----------|---|-------------------------------------------------------------------------|------|---|----------------|---------------------------------------|
| CZ | 121 | 10 | 97162271  | 99162271  | 1 | 10-98162271                                                             | -    | - | -              | -                                     |
| CZ | 122 | 10 | 102600049 | 107657845 | 3 | 10-103600049,10-105552272,10-106657845                                  | -    | - | -              | -                                     |
| CZ | 123 | 11 | 3550977   | 6443394   | 2 | 11-4550977,11-5443394                                                   | Tcn2 | - | -              | -                                     |
| CZ | 124 | 11 | 8117435   | 10117435  | 1 | 11-9117435                                                              | -    | - | -              | -                                     |
| CZ | 125 | 11 | 12072486  | 15414578  | 2 | 11-13072486,11-14733247                                                 | -    | - | -              | -                                     |
| CZ | 126 | 11 | 22356000  | 32432438  | 6 | 11-23356000,11-25179507,11-25557146,11-27452304,11-29441766,11-31432438 | -    | - | Spnb2          | -                                     |
| CZ | 127 | 11 | 39245735  | 40504800  | 1 | 11-40245735                                                             | -    | - | -              | -                                     |
| CZ | 128 | 11 | 46198420  | 47639287  | 1 | 11-46639287                                                             | -    | - | -              | Sperm head PC1<br>(44.6-57.3-73.2 Mb) |
| CZ | 129 | 11 | 55443569  | 58202752  | 2 | 11-56443569,11-57202752                                                 | -    | - | -              | Sperm head PC1<br>(44.6-57.3-73.2 Mb) |
| CZ | 130 | 11 | 59602248  | 61602248  | 1 | 11-60602248                                                             | -    | - | -              | Sperm head PC1<br>(44.6-57.3-73.2 Mb) |
| CZ | 131 | 11 | 63314971  | 65314971  | 1 | 11-64314971                                                             | -    | - | -              | Sperm head PC1<br>(44.6-57.3-73.2 Mb) |
| CZ | 132 | 11 | 66405625  | 71640403  | 2 | 11-67405625,11-70640403                                                 | -    | - | Rangrf,Acadvl  | Sperm head PC1<br>(44.6-57.3-73.2 Mb) |
| CZ | 133 | 11 | 73612361  | 75532119  | 1 | 11-74612361                                                             | -    | - | -              | -                                     |
| CZ | 134 | 11 | 76431151  | 80528556  | 2 | 11-77431151,11-79528556                                                 | -    | - | -              | -                                     |
| CZ | 135 | 11 | 81647709  | 88224080  | 4 | 11-82647709,11-83521834,11-85500652,11-87224080                         | -    | - | Car4(membrane) | -                                     |

Supplementary Table 2

|    |     |    |           |           |   |                                                 |   |   |       |   |
|----|-----|----|-----------|-----------|---|-------------------------------------------------|---|---|-------|---|
| CZ | 136 | 11 | 109425235 | 111425235 | 1 | 11-110425235                                    | - | - | -     | - |
| CZ | 137 | 12 | 2154165   | 8683489   | 4 | 12-3154165,12-4456556,12-5851781,12-7683489     | - | - | Rab10 | - |
| CZ | 138 | 12 | 26681656  | 28681656  | 1 | 12-27681656                                     | - | - | -     | - |
| CZ | 139 | 12 | 39541611  | 45709574  | 4 | 12-40380208,12-41684357,12-42875001,12-44709574 | - | - | -     | - |
| CZ | 140 | 12 | 56123595  | 57869231  | 1 | 12-57123595                                     | - | - | -     | - |
| CZ | 141 | 12 | 62205880  | 64205880  | 1 | 12-63205880                                     | - | - | -     | - |
| CZ | 142 | 12 | 68639964  | 71849999  | 2 | 12-69639964,12-70849999                         | - | - | Atp5s | - |
| CZ | 143 | 12 | 73069953  | 77040630  | 2 | 12-74069953,12-76040630                         | - | - | -     | - |
| CZ | 144 | 12 | 93186183  | 95186183  | 1 | 12-94186183                                     | - | - | -     | - |
| CZ | 145 | 13 | 2251086   | 8692944   | 4 | 13-3251086,13-5233278,13-6260828,13-7692944     | - | - | -     | - |
| CZ | 146 | 13 | 20486398  | 24445323  | 2 | 13-21486398,13-23445323                         | - | - | -     | - |
| CZ | 147 | 13 | 25944890  | 29900057  | 2 | 13-26944890,13-28900057                         | - | - | -     | - |
| CZ | 148 | 13 | 31845130  | 33845130  | 1 | 13-32845130                                     | - | - | -     | - |
| CZ | 149 | 13 | 35754987  | 38373843  | 2 | 13-36754987,13-37373843                         | - | - | -     | - |
| CZ | 150 | 13 | 54218108  | 58019276  | 2 | 13-55218108,13-57019276                         | - | - | -     | - |
| CZ | 151 | 13 | 76259262  | 78259262  | 1 | 13-77259262                                     | - | - | -     | - |
| CZ | 152 | 13 | 81275745  | 86661595  | 3 | 13-82275745,13-84143461,13-85661595             | - | - | -     | - |

Supplementary Table 2

|    |     |    |           |           |   |                                     |      |      |   |                                                                                                                                                               |
|----|-----|----|-----------|-----------|---|-------------------------------------|------|------|---|---------------------------------------------------------------------------------------------------------------------------------------------------------------|
| CZ | 153 | 13 | 88380364  | 91327990  | 2 | 13-89380364,13-90327990             | -    | -    | - | -                                                                                                                                                             |
| CZ | 154 | 13 | 92983877  | 94983877  | 1 | 13-93983877                         | -    | -    | - | -                                                                                                                                                             |
| CZ | 155 | 13 | 96891571  | 98891571  | 1 | 13-97891571                         | -    | -    | - | -                                                                                                                                                             |
| CZ | 156 | 14 | 15599040  | 17599040  | 1 | 14-16599040                         | -    | -    | - | -                                                                                                                                                             |
| CZ | 157 | 14 | 20535572  | 22535572  | 1 | 14-21535572                         | Plau | Plau | - | -                                                                                                                                                             |
| CZ | 158 | 14 | 28585923  | 30500123  | 1 | 14-29500123                         | -    | -    | - | Seminiferous tubule area (25.6-61.6-63.2 Mb)                                                                                                                  |
| CZ | 159 | 14 | 47551836  | 49311055  | 1 | 14-48311055                         | -    | -    | - | Seminiferous tubule area (25.6-61.6-63.2 Mb)                                                                                                                  |
| CZ | 160 | 14 | 70435422  | 73613286  | 2 | 14-71435422,14-72670562             | -    | -    | - | -                                                                                                                                                             |
| CZ | 161 | 14 | 82308345  | 83828913  | 1 | 14-83308345                         | -    | -    | - | -                                                                                                                                                             |
| CZ | 162 | 14 | 86799808  | 88799808  | 1 | 14-87799808                         | -    | -    | - | -                                                                                                                                                             |
| CZ | 163 | 14 | 93730826  | 97619203  | 3 | 14-94730826,14-95297758,14-97274720 | -    | -    | - | -                                                                                                                                                             |
| CZ | 164 | 14 | 102211020 | 104211020 | 1 | 14-103211020                        | -    | -    | - | -                                                                                                                                                             |
| CZ | 165 | 14 | 106243075 | 110288073 | 2 | 14-107243075,14-109288073           | -    | -    | - | -                                                                                                                                                             |
| CZ | 166 | 15 | 12529494  | 14529494  | 1 | 15-13529494                         | -    | -    | - | -                                                                                                                                                             |
| CZ | 167 | 15 | 29894947  | 31894947  | 1 | 15-30894947                         | -    | -    | - | Total abnormal sperm (16.5-27.1-77.2 Mb),Headless/tailless (16.5-16.5-48.2 Mb),Total abnormal sperm (16.5-32.3-68.7 Mb),Headless/tailless (16.5-16.5-48.2 Mb) |

Supplementary Table 2

|    |     |    |          |          |   |                         |   |   |   |                                                                                                                                                               |
|----|-----|----|----------|----------|---|-------------------------|---|---|---|---------------------------------------------------------------------------------------------------------------------------------------------------------------|
| CZ | 168 | 15 | 33949082 | 35949082 | 1 | 15-34949082             | - | - | - | Headless/tailless (16.5-16.5-48.2 Mb),Total abnormal sperm (16.5-32.3-68.7 Mb),Headless/tailless (16.5-16.5-48.2 Mb),Total abnormal sperm (16.5-27.1-77.2 Mb) |
| CZ | 169 | 15 | 36369198 | 38148565 | 1 | 15-37148565             | - | - | - | Total abnormal sperm (16.5-32.3-68.7 Mb),Headless/tailless (16.5-16.5-48.2 Mb),Total abnormal sperm (16.5-27.1-77.2 Mb),Headless/tailless (16.5-16.5-48.2 Mb) |
| CZ | 170 | 15 | 41990323 | 43990323 | 1 | 15-42990323             | - | - | - | Headless/tailless (16.5-16.5-48.2 Mb),Total abnormal sperm (16.5-27.1-77.2 Mb),Headless/tailless (16.5-16.5-48.2 Mb),Total abnormal sperm (16.5-32.3-68.7 Mb) |
| CZ | 171 | 15 | 47720601 | 49720601 | 1 | 15-48720601             | - | - | - | Total abnormal sperm (16.5-27.1-77.2 Mb),Total abnormal sperm (16.5-32.3-68.7 Mb)                                                                             |
| CZ | 172 | 15 | 51076151 | 54991323 | 2 | 15-52076151,15-53991323 | - | - | - | Total abnormal sperm (16.5-27.1-77.2 Mb),Total abnormal sperm (16.5-32.3-68.7 Mb)                                                                             |

Supplementary Table 2

|    |     |    |          |          |   |                                                             |   |   |                |                                                                                                         |
|----|-----|----|----------|----------|---|-------------------------------------------------------------|---|---|----------------|---------------------------------------------------------------------------------------------------------|
| CZ | 173 | 15 | 58164077 | 61560216 | 2 | 15-58585843,15-60560216                                     | - | - | -              | Total abnormal sperm (16.5-32.3-68.7 Mb),Total abnormal sperm (16.5-27.1-77.2 Mb)                       |
| CZ | 174 | 15 | 63480133 | 65480133 | 1 | 15-64480133                                                 | - | - | -              | Total abnormal sperm (16.5-27.1-77.2 Mb),Total abnormal sperm (16.5-32.3-68.7 Mb)                       |
| CZ | 175 | 15 | 85277322 | 87277322 | 1 | 15-86277322                                                 | - | - | -              | -                                                                                                       |
| CZ | 176 | 16 | 2700097  | 4338117  | 1 | 16-3700097                                                  | - | - | -              | -                                                                                                       |
| CZ | 177 | 16 | 6505067  | 13564128 | 4 | 16-7505067,16-8698500,16-10673724,16-12564128               | - | - | -              | -                                                                                                       |
| CZ | 178 | 16 | 15416923 | 17556714 | 2 | 16-16416923,16-16556714                                     | - | - | Ube2v2,Ccdc116 | -                                                                                                       |
| CZ | 179 | 16 | 18983977 | 22478833 | 2 | 16-19983977,16-21985197                                     | - | - | -              | -                                                                                                       |
| CZ | 180 | 16 | 23314023 | 33479955 | 5 | 16-24314023,16-24483552,16-26430126,16-28426143,16-32479955 | - | - | -              | -                                                                                                       |
| CZ | 181 | 16 | 34369703 | 35568135 | 1 | 16-34568135                                                 | - | - | -              | -                                                                                                       |
| CZ | 182 | 16 | 37511344 | 39511344 | 1 | 16-38511344                                                 | - | - | -              | -                                                                                                       |
| CZ | 183 | 16 | 41542464 | 43542464 | 1 | 16-42542464                                                 | - | - | -              | -                                                                                                       |
| CZ | 184 | 16 | 73152290 | 75152290 | 1 | 16-74152290                                                 | - | - | -              | Seminiferous tubule area (66.8-88.2-97.2 Mb)                                                            |
| CZ | 185 | 17 | 13320574 | 15320574 | 1 | 17-14320574                                                 | - | - | -              | Relative testis weight (3.1-57.9-73.2 Mb),Sperm density (3.1-30-64.5 Mb),Sperm density (3.1-30-65.2 Mb) |



Supplementary Table 2

|    |     |    |          |          |   |                                                 |               |                      |       |                                                                                                         |
|----|-----|----|----------|----------|---|-------------------------------------------------|---------------|----------------------|-------|---------------------------------------------------------------------------------------------------------|
| CZ | 186 | 17 | 22649616 | 24649616 | 1 | 17-23649616                                     | -             | Sbpl,Sbp             | -     | Sperm density (3.1-30-65.2 Mb),Relative testis weight (3.1-57.9-73.2 Mb),Sperm density (3.1-30-64.5 Mb) |
| CZ | 187 | 17 | 46076641 | 48076641 | 1 | 17-47076641                                     | -             | -                    | -     | Sperm density (3.1-30-65.2 Mb),Relative testis weight (3.1-57.9-73.2 Mb),Sperm density (3.1-30-64.5 Mb) |
| CZ | 188 | 17 | 65669344 | 66932862 | 1 | 17-65932862                                     | -             | -                    | -     | Relative testis weight (3.1-57.9-73.2 Mb)                                                               |
| CZ | 189 | 17 | 73983870 | 77243167 | 2 | 17-74397535,17-76243167                         | -             | -                    | -     | -                                                                                                       |
| CZ | 190 | 18 | 2862702  | 4862702  | 1 | 18-3862702                                      | -             | -                    | -     | -                                                                                                       |
| CZ | 191 | 18 | 8290218  | 10290218 | 1 | 18-9290218                                      | -             | -                    | -     | -                                                                                                       |
| CZ | 192 | 18 | 11307327 | 17843344 | 4 | 18-12307327,18-14214601,18-16202912,18-16843344 | -             | -                    | Cabyr | -                                                                                                       |
| CZ | 193 | 18 | 21349665 | 25038568 | 2 | 18-22349665,18-24038568                         | -             | -                    | -     | -                                                                                                       |
| CZ | 194 | 18 | 42779798 | 44779798 | 1 | 18-43779798                                     | Spink3,Spinkl | Spink3,Spinkl,Spink5 | -     | -                                                                                                       |
| CZ | 195 | 18 | 62057278 | 64057278 | 1 | 18-63057278                                     | -             | -                    | -     | Seminiferous tubule area (58-68.5-78.1 Mb),Seminiferous tubule area (60.3-69.6-80 Mb)                   |
| CZ | 196 | 18 | 64975671 | 66125790 | 1 | 18-65125790                                     | -             | -                    | -     | Seminiferous tubule area (60.3-69.6-80 Mb),Seminiferous tubule area (58-68.5-78.1 Mb)                   |

Supplementary Table 2

|    |     |    |          |          |   |                                                 |   |   |              |                                                                                       |
|----|-----|----|----------|----------|---|-------------------------------------------------|---|---|--------------|---------------------------------------------------------------------------------------|
| CZ | 197 | 18 | 68003125 | 70003125 | 1 | 18-69003125                                     | - | - | -            | Seminiferous tubule area (60.3-69.6-80 Mb),Seminiferous tubule area (58-68.5-78.1 Mb) |
| CZ | 198 | 18 | 83003003 | 85003003 | 1 | 18-84003003                                     | - | - | -            | -                                                                                     |
| CZ | 199 | 19 | 6781659  | 13123831 | 4 | 19-7781659,19-8666958,19-10618811,19-12123831   | - | - | Kcnk4        | -                                                                                     |
| CZ | 200 | 19 | 15098801 | 17098801 | 1 | 19-16098801                                     | - | - | -            | -                                                                                     |
| CZ | 201 | 19 | 25700822 | 28863723 | 2 | 19-26700822,19-27863723                         | - | - | -            | -                                                                                     |
| CZ | 202 | 19 | 36043620 | 38043620 | 1 | 19-37043620                                     | - | - | -            | -                                                                                     |
| CZ | 203 | 19 | 39111518 | 47038714 | 4 | 19-40111518,19-41084697,19-44454439,19-46038714 | - | - | Cwf1911,Cutc | -                                                                                     |

\* membrane: extracellular side of a sperm

\*\* The region numbers for BV and CZ correspond to those in supplementary figure 3a, b
