# Supplementary material
Source: PubMed Central journal article supplement (PMC3872452)
Supplement: NIHMS544236-supplement-Table_S3.pdf [file NIHMS544236-supplement-Table_S3.pdf]

Supplementary Table 3

## Molecular function

| Transect   | GO Term Accession         | GO Term Name                                                                                          | P-value   | P-value (BC) | № Genes Obs | № Genes Exp | Significance |
|------------|---------------------------|-------------------------------------------------------------------------------------------------------|-----------|--------------|-------------|-------------|--------------|
| BV         | GO:0005125                | cytokine activity                                                                                     | 2.62E-006 | 3.07E-004    | 58          | 33.57       | **           |
|            | GO:0004252                | serine-type endopeptidase activity                                                                    | 1.86E-003 | 2.18E-001    | 57          | 40.54       | *            |
|            | GO:0003700                | sequence-specific DNA binding transcription factor activity                                           | 1.93E-003 | 2.26E-001    | 208         | 174.62      | *            |
| CZ         | GO:0030414                | peptidase inhibitor activity                                                                          | 4.56E-007 | 5.34E-005    | 44          | 22.72       | **           |
|            | GO:0020037                | heme binding                                                                                          | 6.18E-007 | 7.23E-005    | 69          | 41.05       | **           |
|            | GO:0016705                | oxidoreductase activity, acting on paired donors, with incorporation or reduction of molecular oxygen | 7.27E-007 | 8.50E-005    | 36          | 17.59       | **           |
|            | GO:0016779                | nucleotidyltransferase activity                                                                       | 2.37E-006 | 2.78E-004    | 35          | 17.59       | **           |
|            | GO:0003677                | DNA binding                                                                                           | 5.28E-006 | 6.18E-004    | 413         | 343.55      | **           |
|            | GO:0004867                | serine-type endopeptidase inhibitor activity                                                          | 5.69E-006 | 6.66E-004    | 47          | 26.63       | **           |
|            | GO:0008009                | chemokine activity                                                                                    | 1.76E-005 | 2.06E-003    | 26          | 12.71       | **           |
|            | GO:0005179                | hormone activity                                                                                      | 4.55E-005 | 5.32E-003    | 43          | 25.41       | **           |
|            | GO:0004497                | monooxygenase activity                                                                                | 2.17E-004 | 2.54E-002    | 32          | 18.57       | **           |
|            | GO:0046872                | metal ion binding                                                                                     | 4.80E-004 | 5.62E-002    | 677         | 610.14      | **           |
| GO:0009055 | electron carrier activity | 1.65E-003                                                                                             | 1.93E-001 | 58           | 41.54       | **          |              |
| GO:0008201 | heparin binding           | 1.84E-003                                                                                             | 2.15E-001 | 36           | 23.70       | **          |              |
| Without X  | GO:0008009                | chemokine activity                                                                                    | 2.32E-007 | 2.70E-005    | 14          | 3.12        | **           |
|            | GO:0046872                | metal ion binding                                                                                     | 3.48E-007 | 4.04E-005    | 207         | 149.60      | **           |
|            | GO:0030414                | peptidase inhibitor activity                                                                          | 8.75E-006 | 1.02E-003    | 17          | 5.57        | **           |
|            | GO:0008201                | heparin binding                                                                                       | 1.61E-005 | 1.86E-003    | 17          | 5.81        | **           |
|            | GO:0003676                | nucleic acid binding                                                                                  | 3.35E-005 | 3.89E-003    | 104         | 71.00       | **           |
|            | GO:0016705                | oxidoreductase activity, acting on paired donors, with incorporation or reduction of molecular oxygen | 8.10E-005 | 9.39E-003    | 13          | 4.31        | **           |
|            | GO:0004497                | monooxygenase activity                                                                                | 1.49E-004 | 1.73E-002    | 13          | 4.55        | **           |
|            | GO:0008270                | zinc ion binding                                                                                      | 2.75E-004 | 3.19E-002    | 148         | 113.17      | **           |
|            | GO:0005507                | copper ion binding                                                                                    | 6.55E-004 | 7.60E-002    | 9           | 3.00        | **           |
|            | GO:0004867                | serine-type endopeptidase inhibitor activity                                                          | 7.67E-004 | 8.89E-002    | 15          | 6.53        | **           |

Supplementary Table 3

|             |            |                                                                                                       |           |           |     |        |    |
|-------------|------------|-------------------------------------------------------------------------------------------------------|-----------|-----------|-----|--------|----|
|             | GO:0003700 | sequence-specific DNA binding transcription factor activity                                           | 2.22E-003 | 2.58E-001 | 69  | 49.55  | ** |
|             | GO:0020037 | heme binding                                                                                          | 5.78E-003 | 6.70E-001 | 18  | 10.07  | *  |
|             | GO:0043565 | sequence-specific DNA binding                                                                         | 8.10E-003 | 9.40E-001 | 49  | 35.23  | *  |
|             | GO:0009055 | electron carrier activity                                                                             | 1.36E-002 | 1.00E+000 | 17  | 10.18  | *  |
| Including X | GO:0046872 | metal ion binding                                                                                     | 1.31E-005 | 1.50E-003 | 221 | 169.87 | ** |
|             | GO:0030414 | peptidase inhibitor activity                                                                          | 5.01E-005 | 5.72E-003 | 17  | 6.35   | ** |
|             | GO:0003676 | nucleic acid binding                                                                                  | 7.80E-005 | 8.89E-003 | 113 | 80.09  | ** |
|             | GO:0008201 | heparin binding                                                                                       | 8.91E-005 | 1.02E-002 | 17  | 6.62   | ** |
|             | GO:0016705 | oxidoreductase activity, acting on paired donors, with incorporation or reduction of molecular oxygen | 3.18E-004 | 3.62E-002 | 13  | 4.92   | ** |
|             | GO:0004497 | monooxygenase activity                                                                                | 5.66E-004 | 6.45E-002 | 13  | 5.19   | ** |
|             | GO:0008270 | zinc ion binding                                                                                      | 2.57E-003 | 2.93E-001 | 158 | 128.43 | ** |
|             | GO:0004867 | serine-type endopeptidase inhibitor activity                                                          | 2.94E-003 | 3.36E-001 | 15  | 7.44   | ** |
|             | GO:0003700 | sequence-specific DNA binding transcription factor activity                                           | 3.33E-003 | 3.80E-001 | 76  | 56.40  | ** |

**Biological process**

| Transect | GO Term Accession | GO Term Name                               | P-value   | P-value (BC) | № Genes Obs | № Genes Exp | Significance |
|----------|-------------------|--------------------------------------------|-----------|--------------|-------------|-------------|--------------|
| BV       | GO:0006952        | defense response                           | 4.44E-012 | 9.73E-010    | 58          | 18.16       | **           |
|          | GO:0042742        | defense response to bacterium              | 1.04E-008 | 2.29E-006    | 44          | 20.06       | **           |
|          | GO:0009615        | response to virus                          | 1.60E-005 | 3.51E-003    | 40          | 21.96       | **           |
|          | GO:0006355        | regulation of transcription, DNA-dependent | 1.51E-004 | 3.31E-002    | 454         | 392.74      | **           |
|          | GO:0009952        | anterior/posterior pattern formation       | 9.26E-004 | 2.03E-001    | 34          | 21.12       | **           |
| CZ       | GO:0006334        | nucleosome assembly                        | 0.00E+000 | 0.00E+000    | 77          | 30.30       | **           |
|          | GO:0006396        | RNA processing                             | 5.32E-004 | 1.17E-001    | 24          | 13.44       | **           |
|          | GO:0007417        | central nervous system development         | 1.00E-003 | 2.19E-001    | 26          | 15.39       | *            |
|          | GO:0001501        | skeletal system development                | 1.54E-003 | 3.37E-001    | 30          | 18.81       | *            |
|          | GO:0001666        | response to hypoxia                        | 2.87E-003 | 6.28E-001    | 63          | 46.67       | *            |
|          | GO:0006351        | transcription, DNA-dependent               | 3.13E-003 | 6.85E-001    | 130         | 105.80      | *            |
| hout X   | GO:0006355        | regulation of transcription, DNA-dependent | 3.33E-008 | 7.12E-006    | 167         | 111.44      | **           |
|          | GO:0006935        | chemotaxis                                 | 1.50E-005 | 3.21E-003    | 15          | 4.73        | *            |

Supplementary Table 3

|             |            |                                            |           |           |     |        |    |
|-------------|------------|--------------------------------------------|-----------|-----------|-----|--------|----|
| With        | GO:0006396 | RNA processing                             | 1.42E-003 | 3.04E-001 | 9   | 3.30   | *  |
| Including X | GO:0006355 | regulation of transcription, DNA-dependent | 3.66E-007 | 7.84E-005 | 180 | 126.38 | ** |
|             | GO:0006935 | chemotaxis                                 | 2.61E-006 | 5.59E-004 | 17  | 5.19   | ** |
|             | GO:0007519 | skeletal muscle tissue development         | 1.90E-004 | 4.07E-002 | 11  | 3.62   | ** |
|             | GO:0006396 | RNA processing                             | 1.06E-003 | 2.28E-001 | 10  | 3.76   | *  |
|             | GO:0006310 | DNA recombination                          | 2.92E-003 | 6.25E-001 | 10  | 4.23   | *  |

P-value (BC): p-value after Bonferroni correction

Significance: \* FDR  $\leq$  0.1, \*\* FDR  $\leq$  0.05
