# Supplementary material
Source: PubMed Central journal article supplement (PMC3872452)

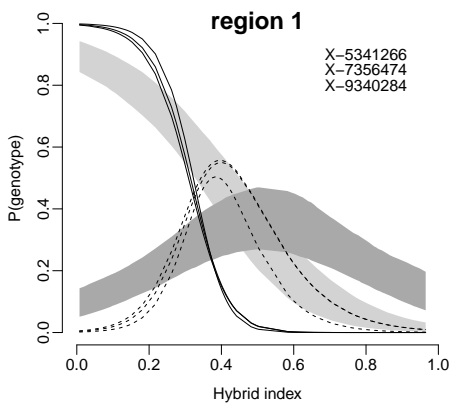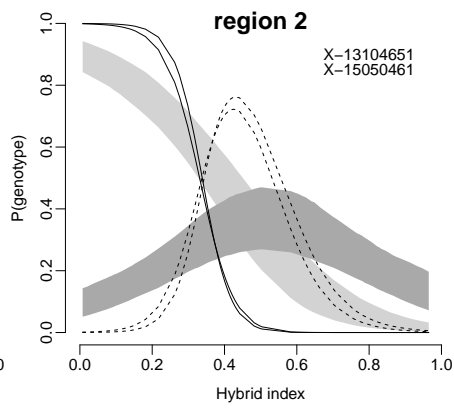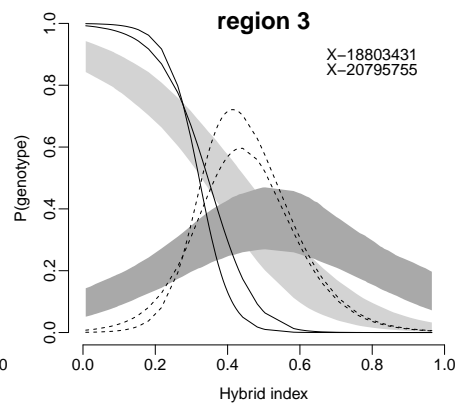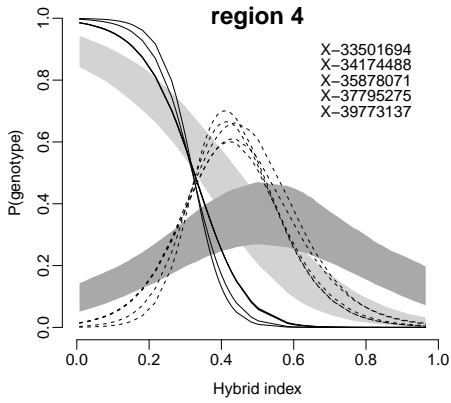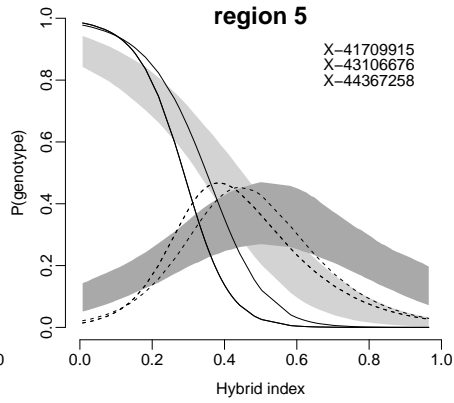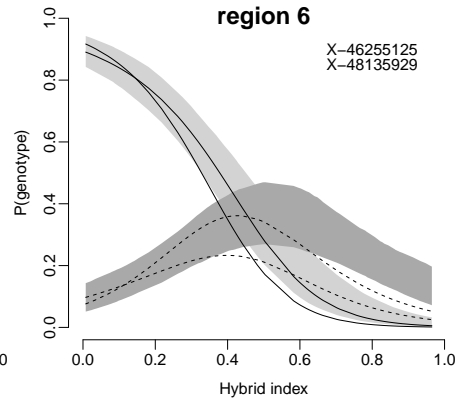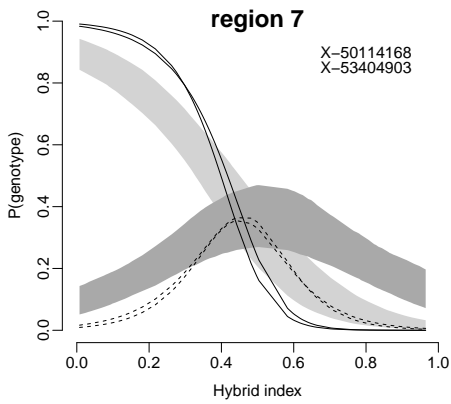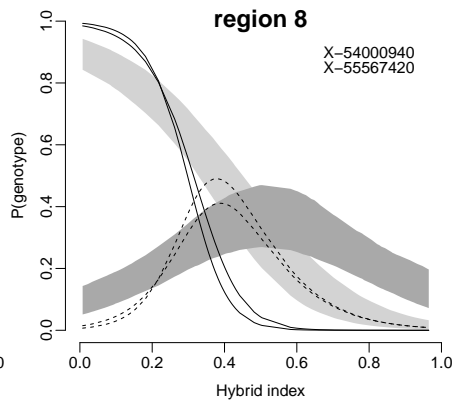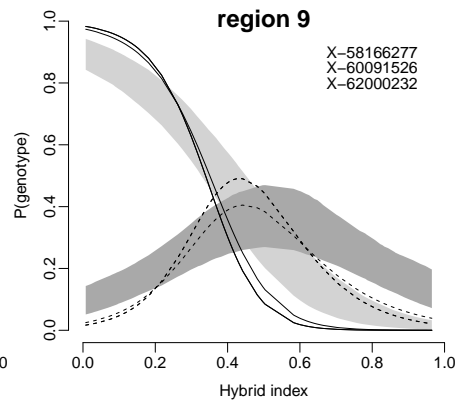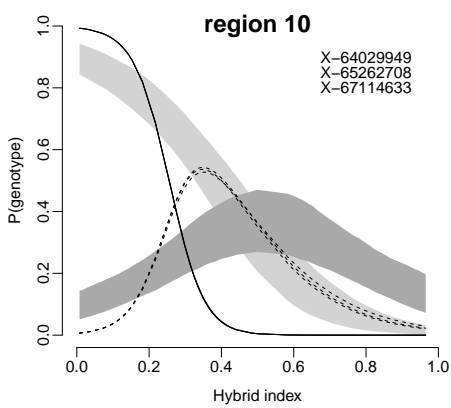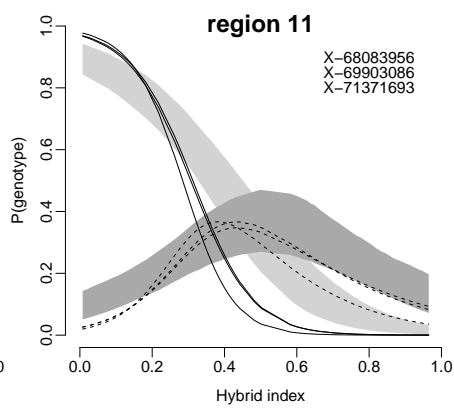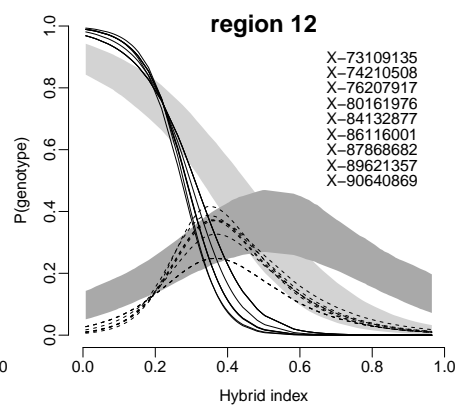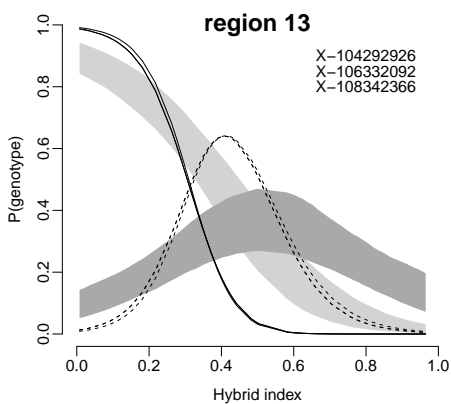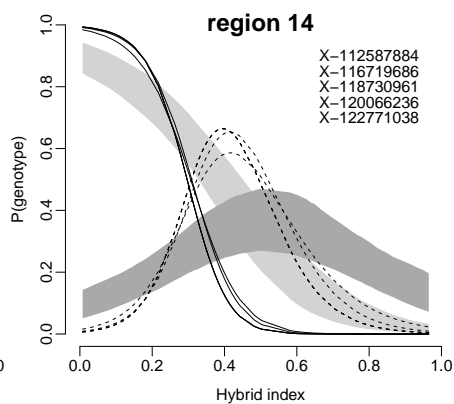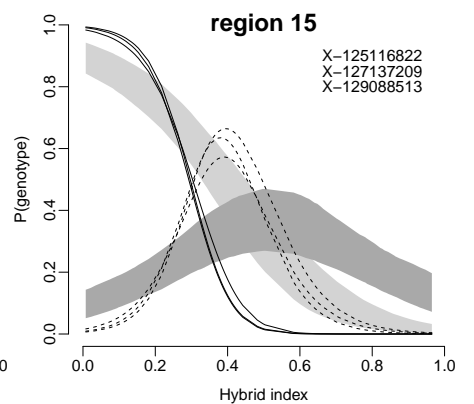

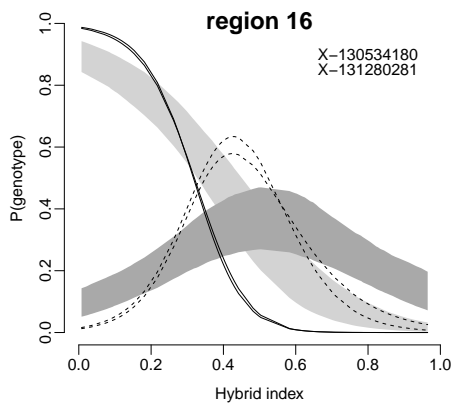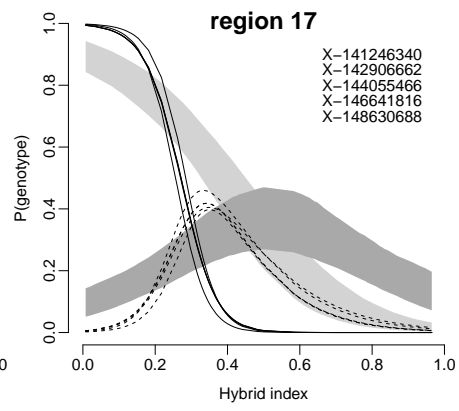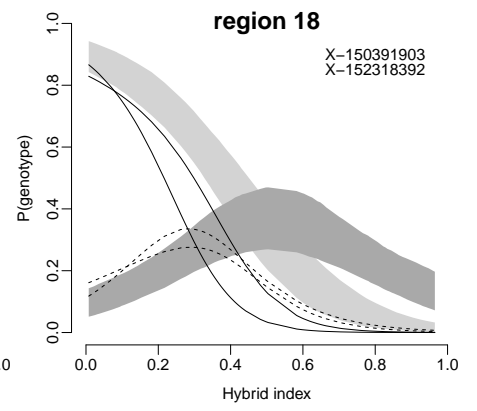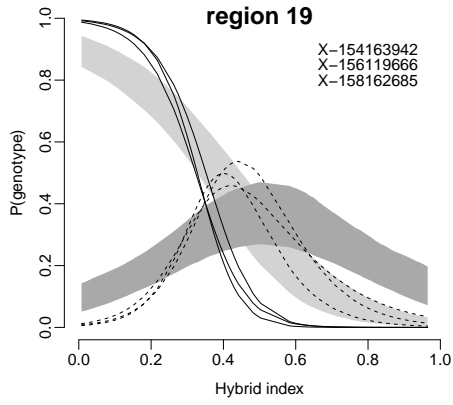

Supplement: NIHMS544236-supplement-Fig_S1a.pdf [file NIHMS544236-supplement-Fig_S1a.pdf]

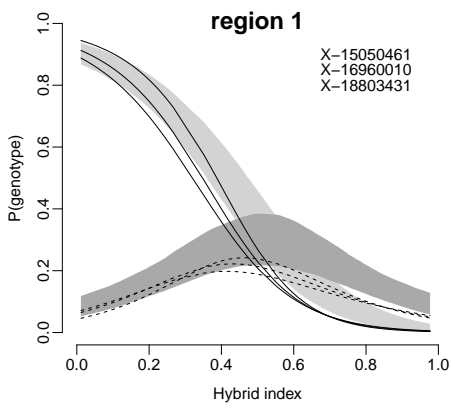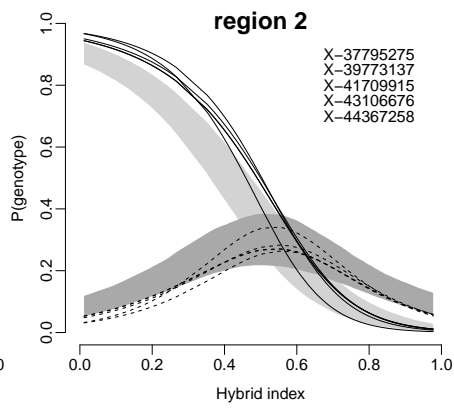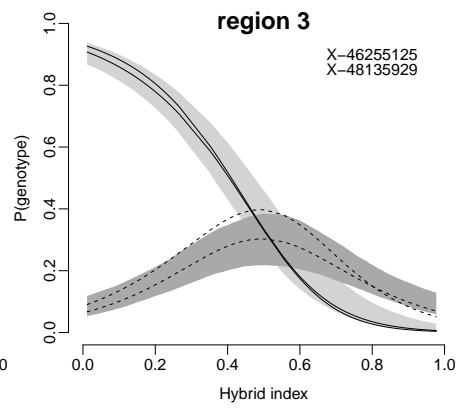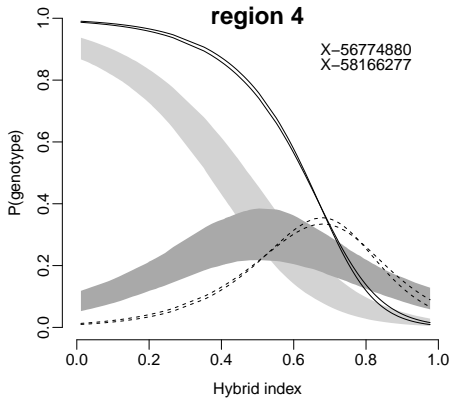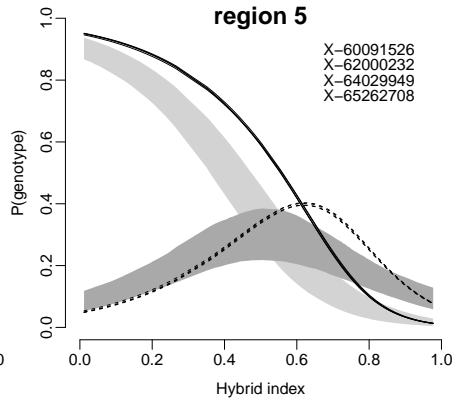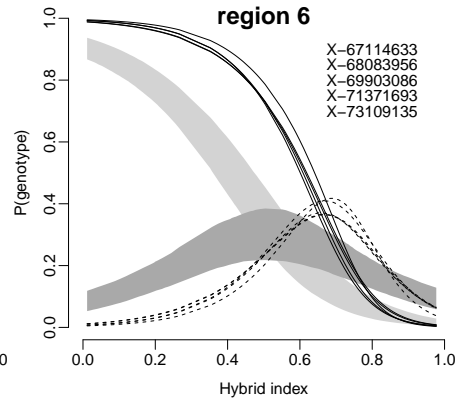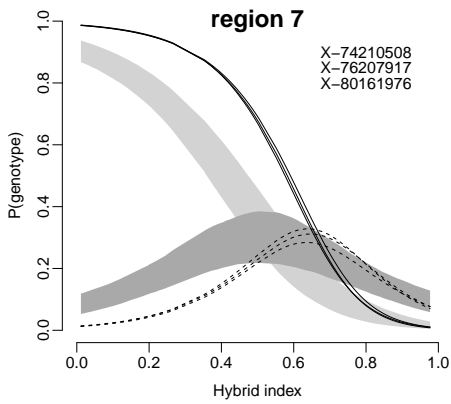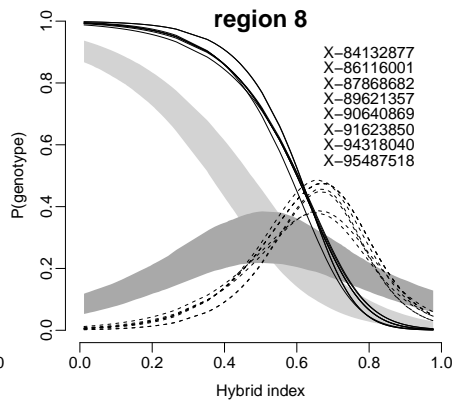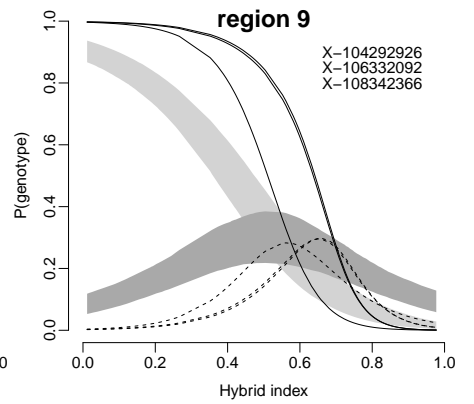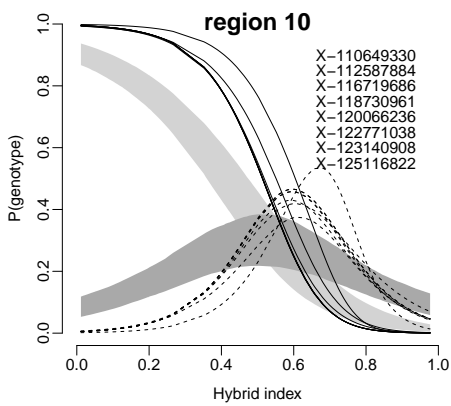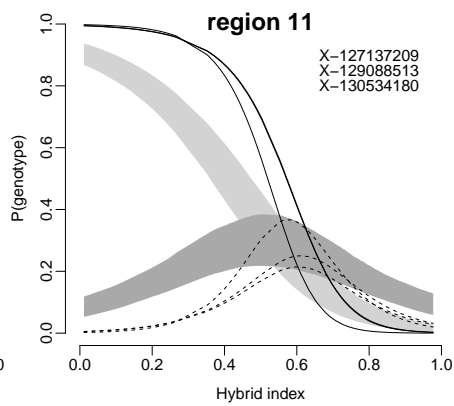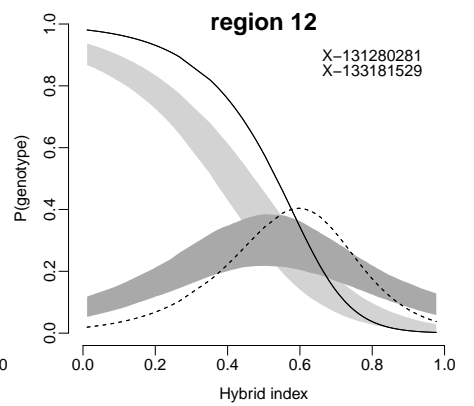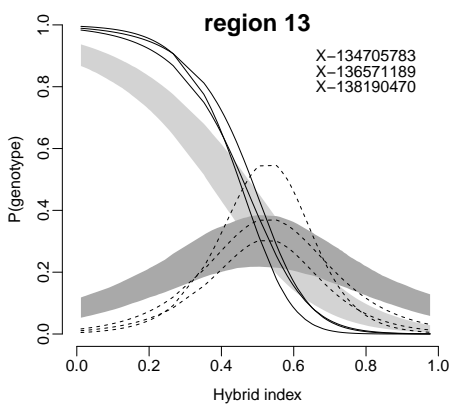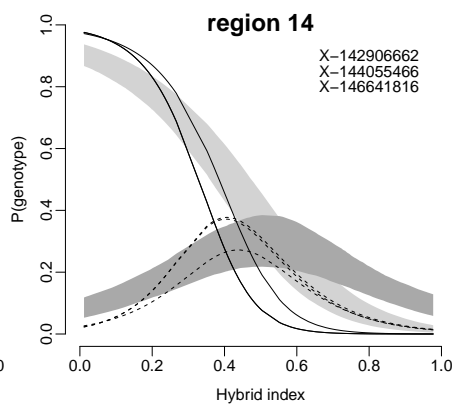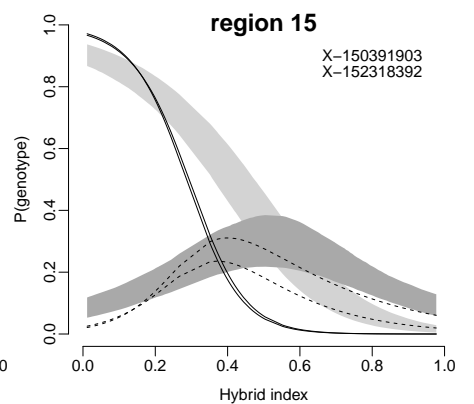

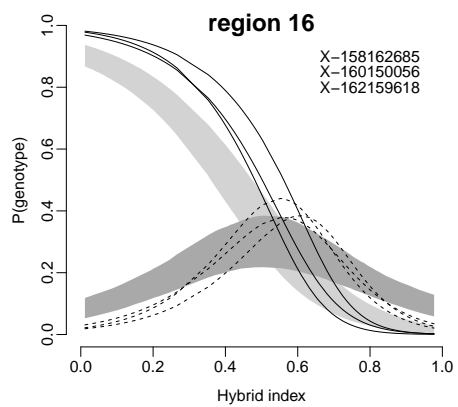

Supplement: NIHMS544236-supplement-Fig_S1b.pdf [file NIHMS544236-supplement-Fig_S1b.pdf]

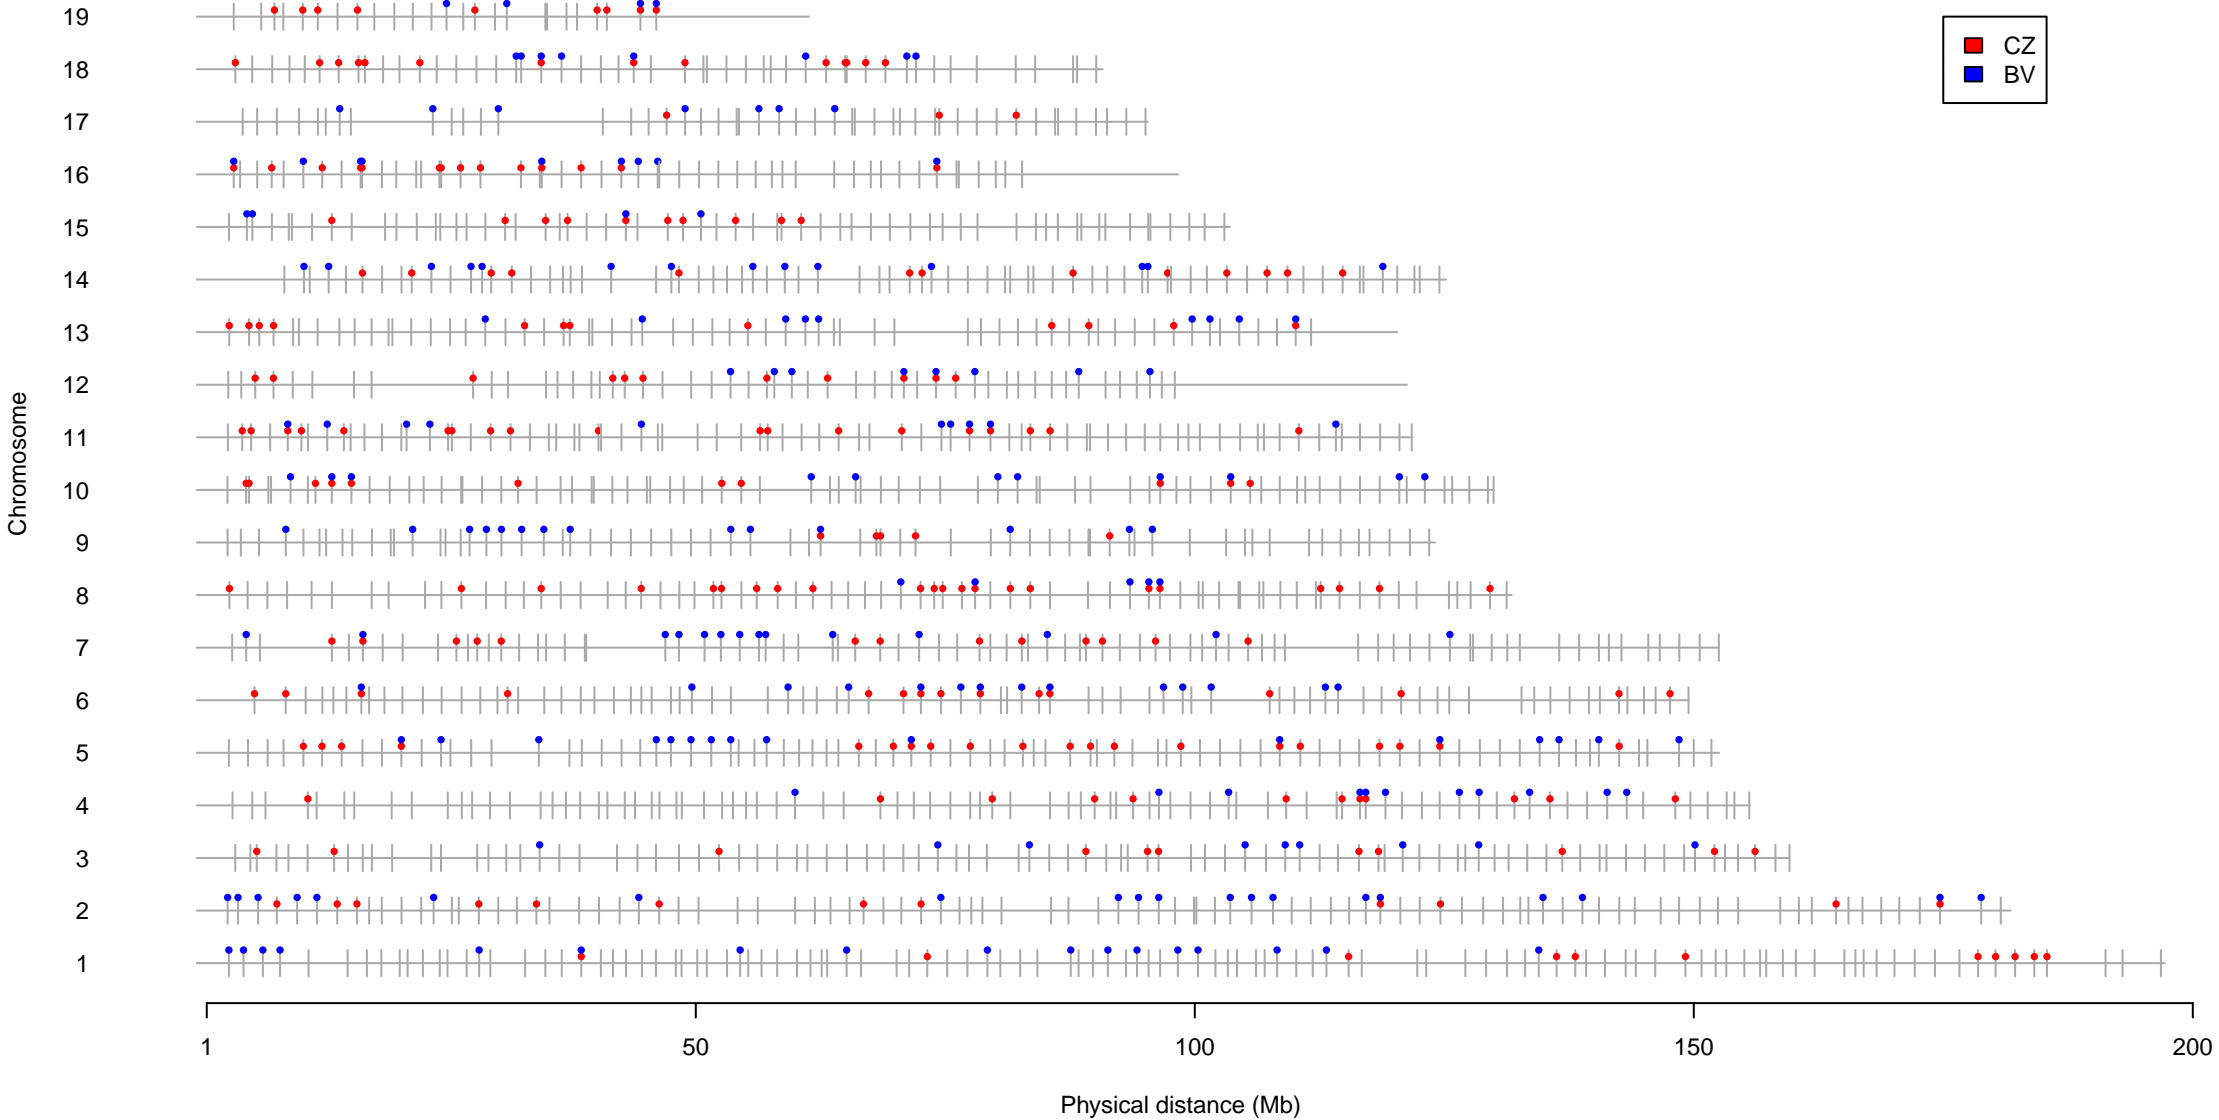

Supplement: NIHMS544236-supplement-Fig_S2.pdf [file NIHMS544236-supplement-Fig_S2.pdf]

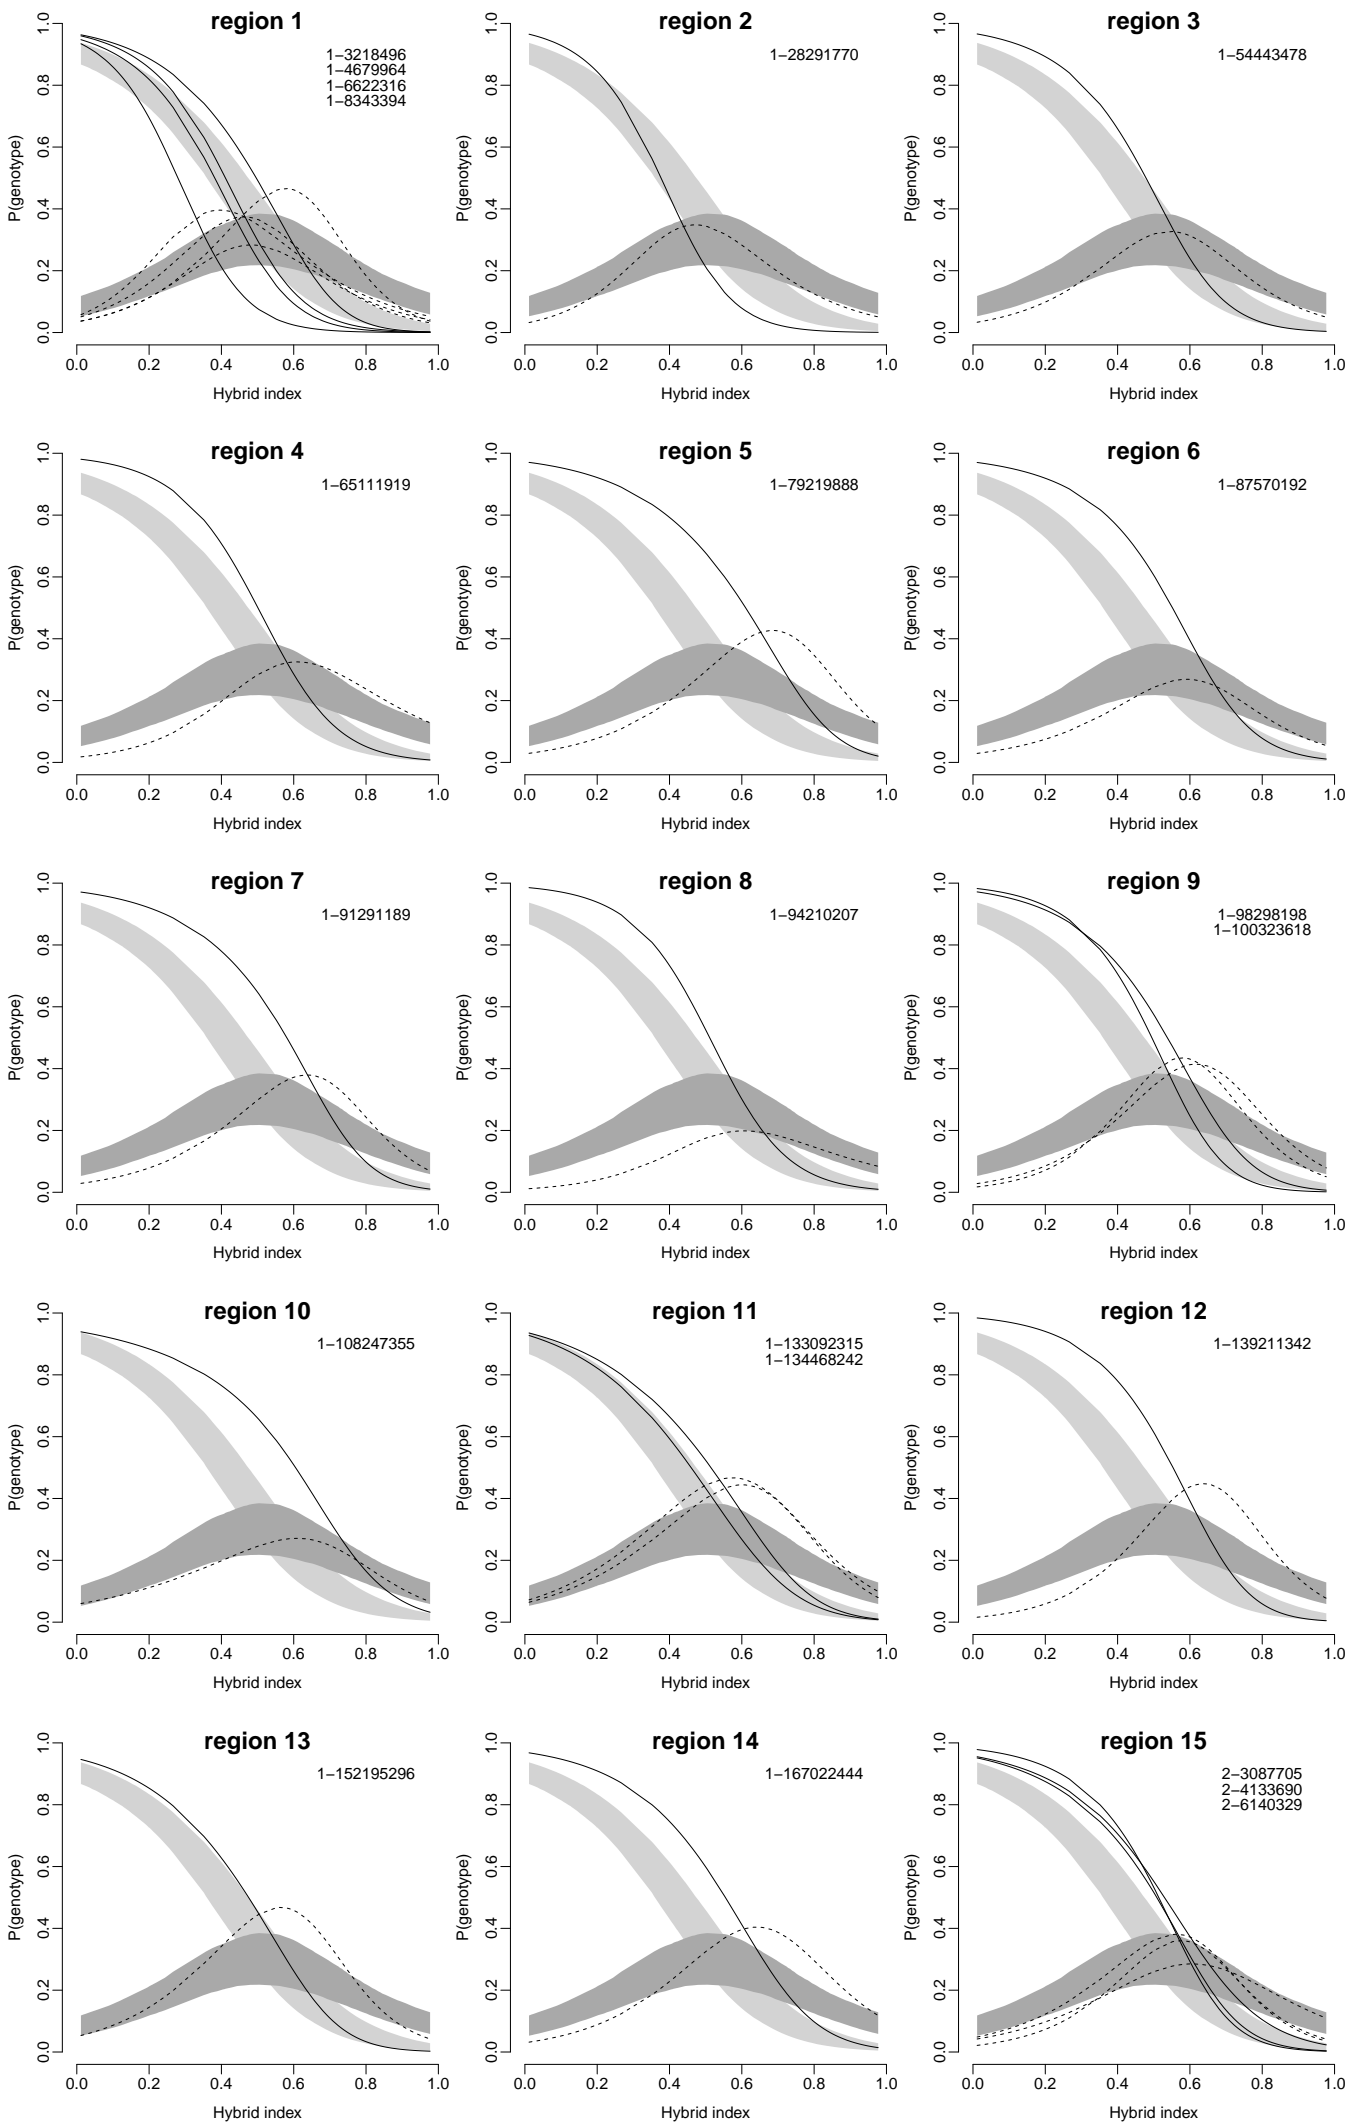

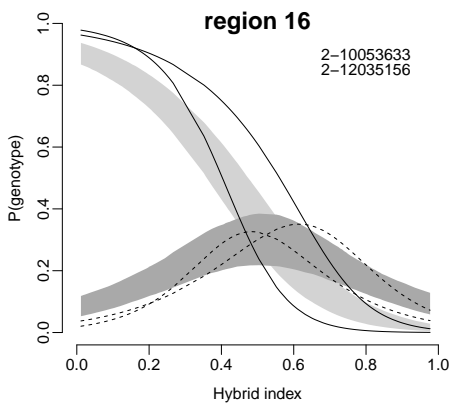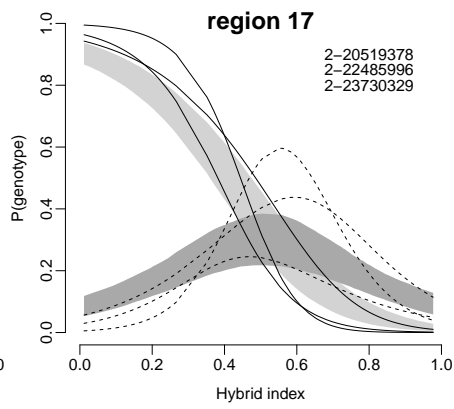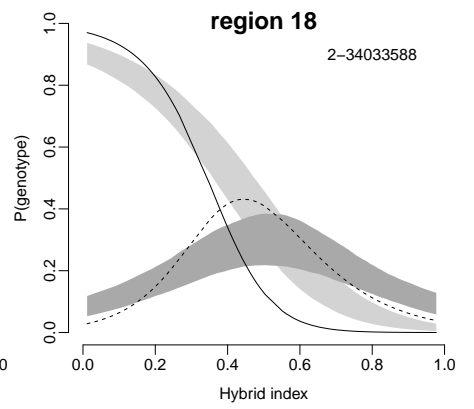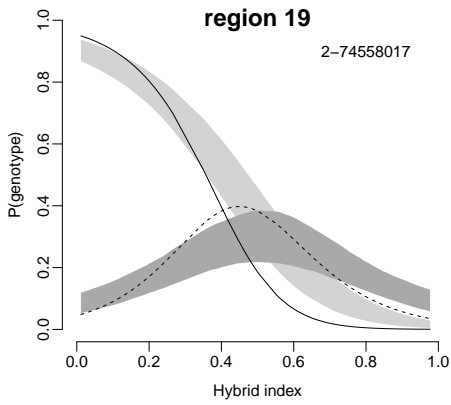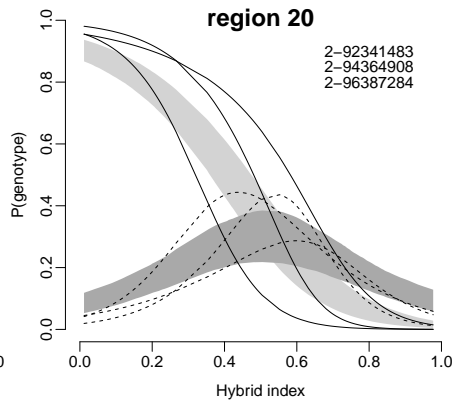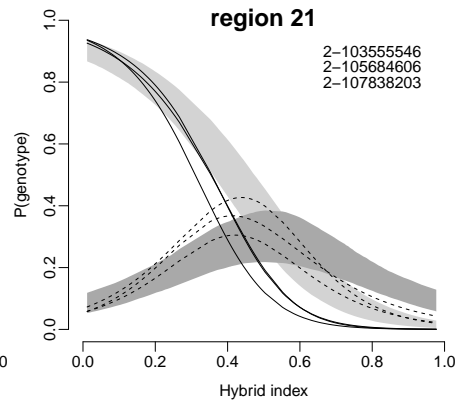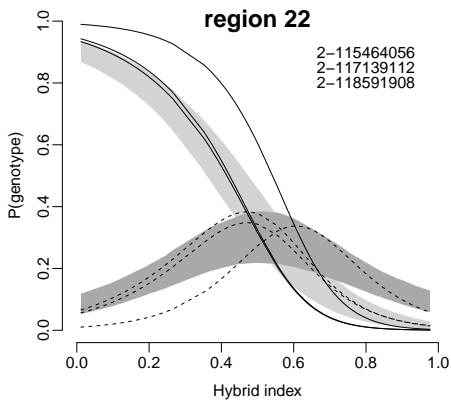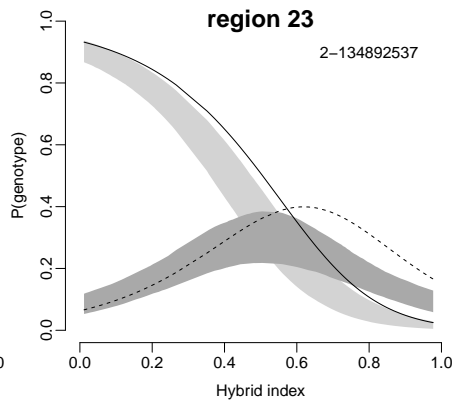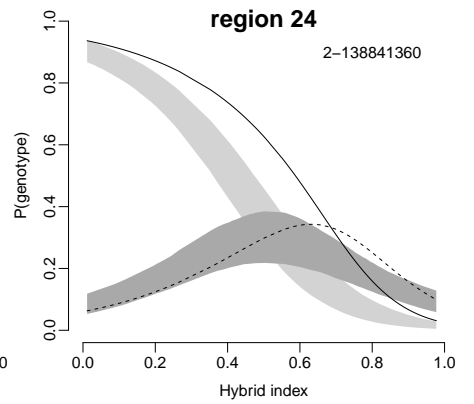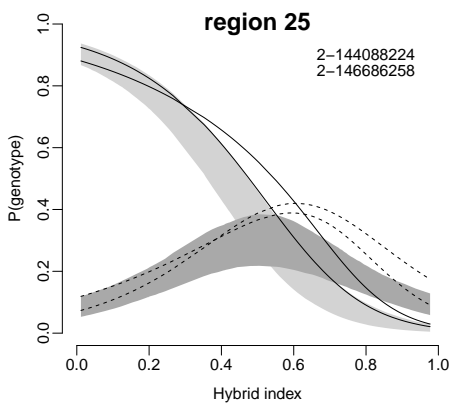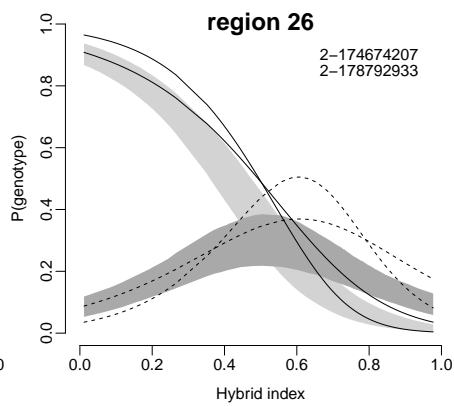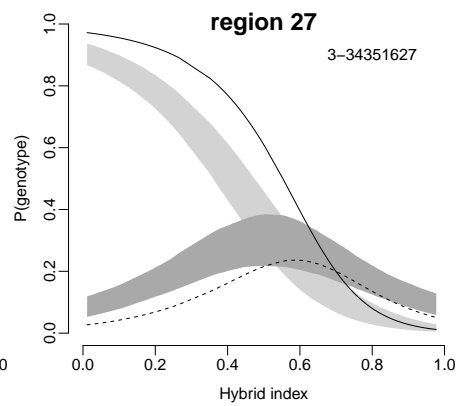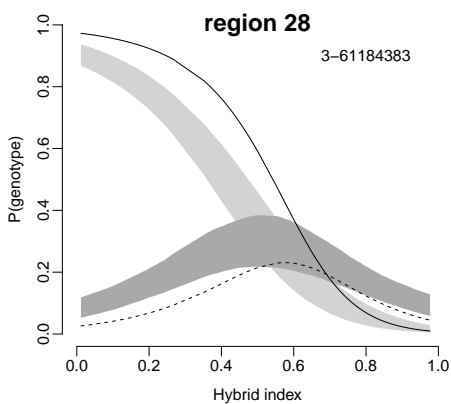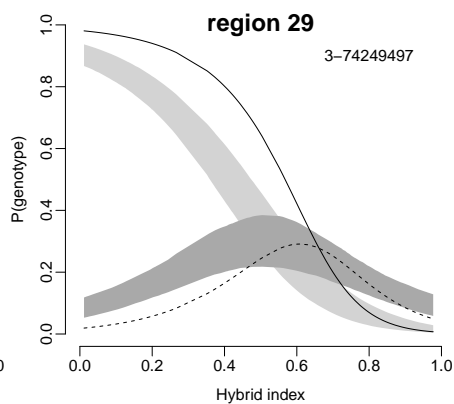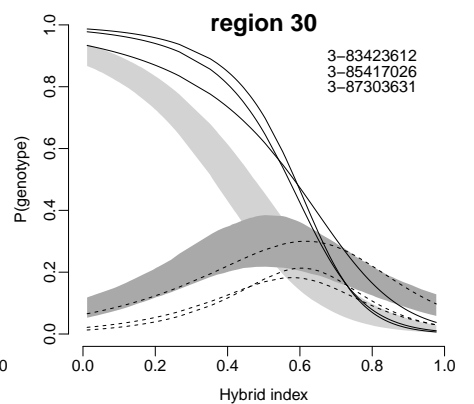

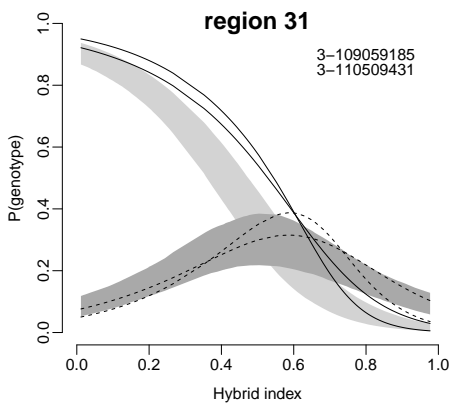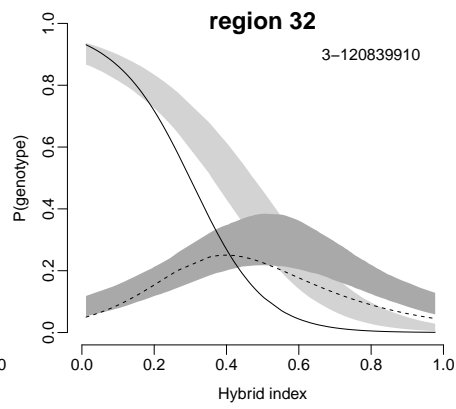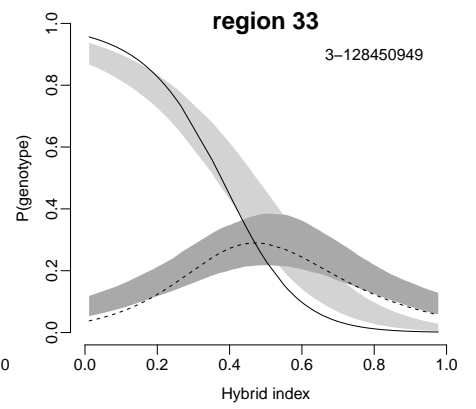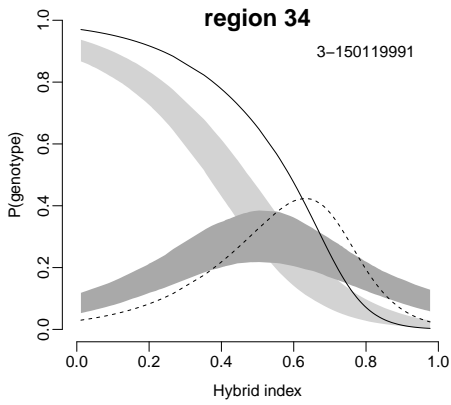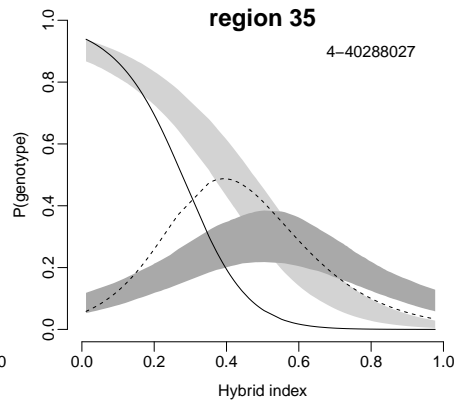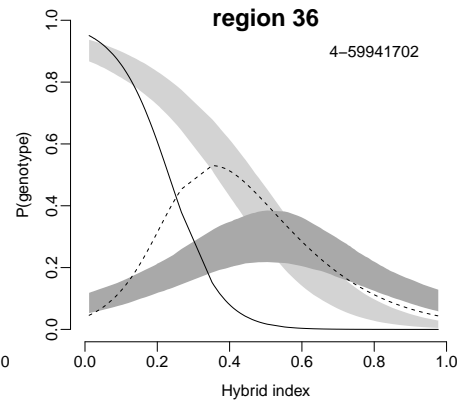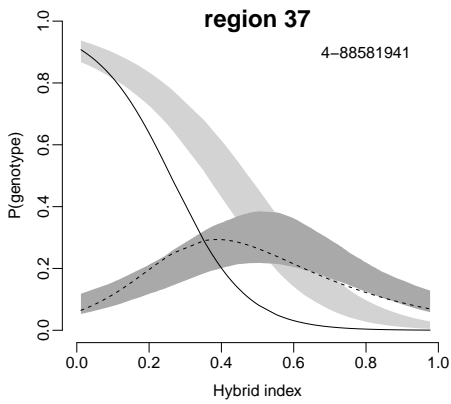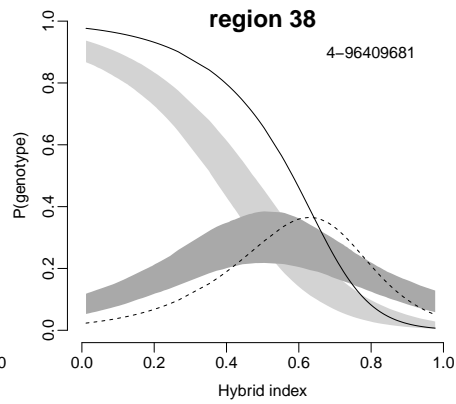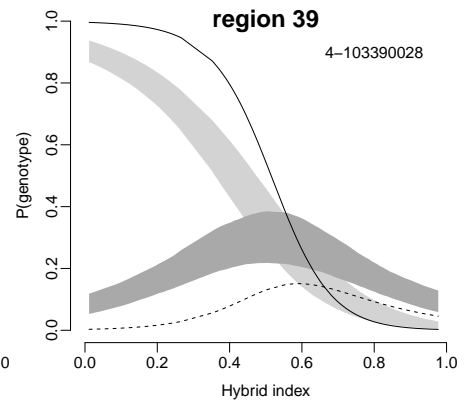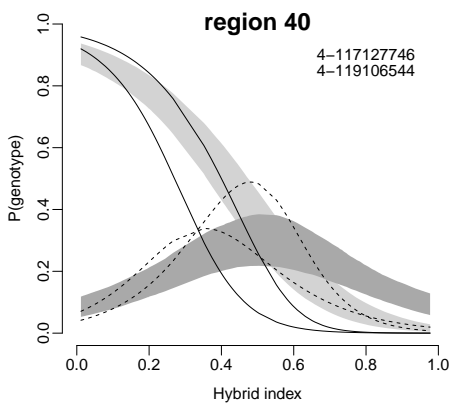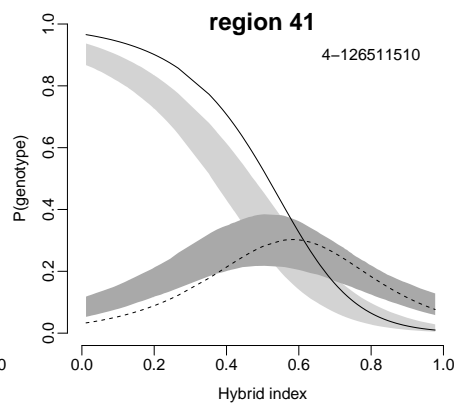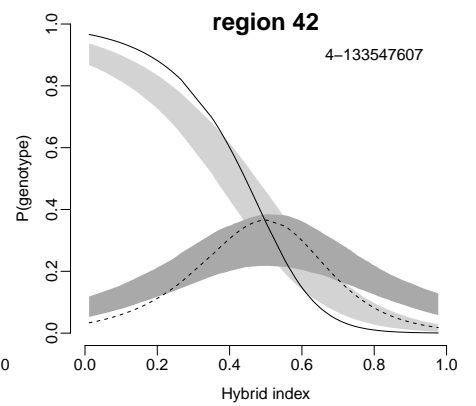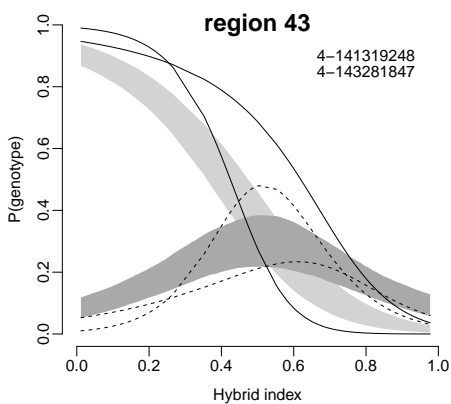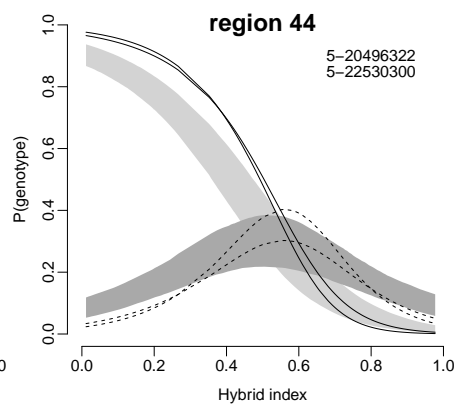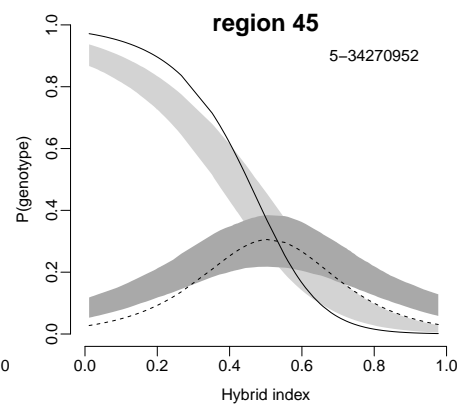

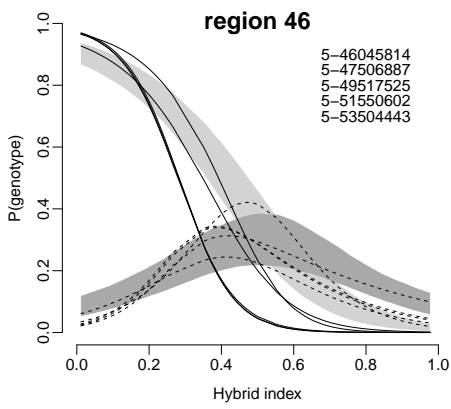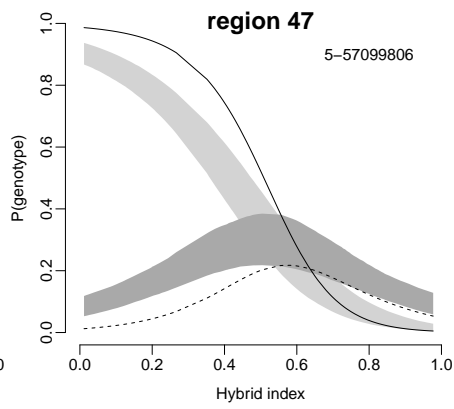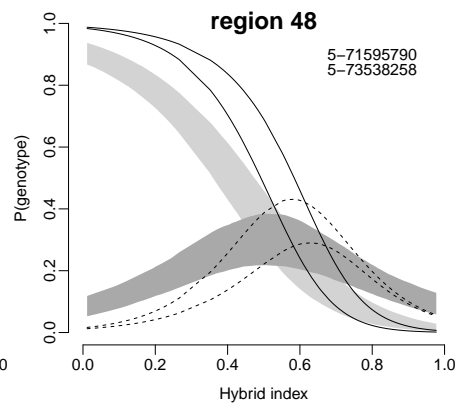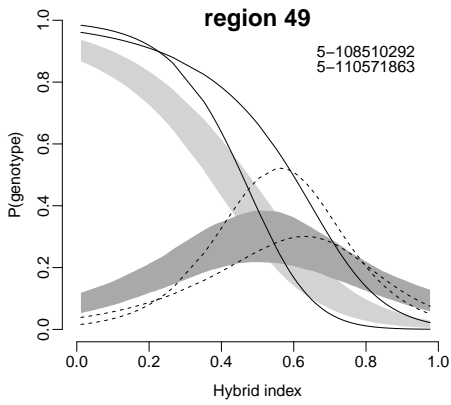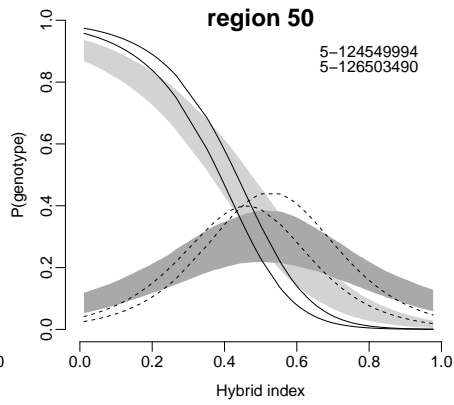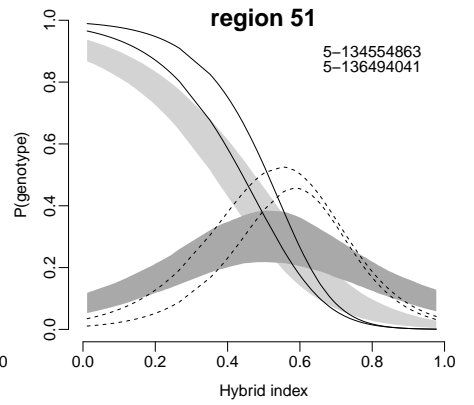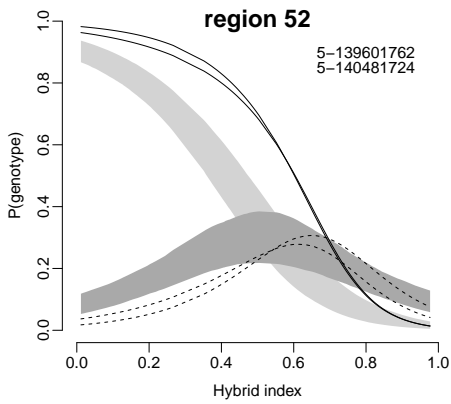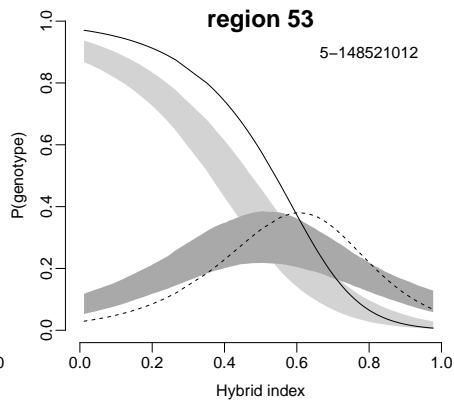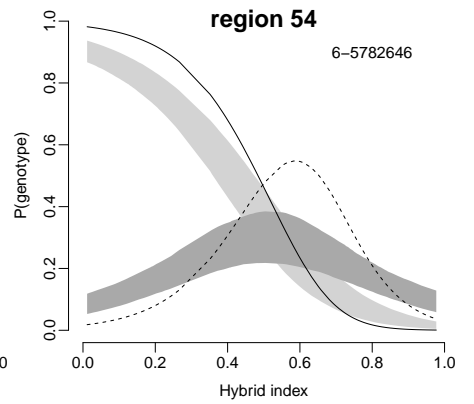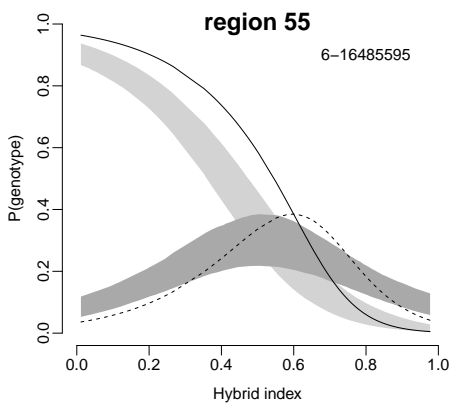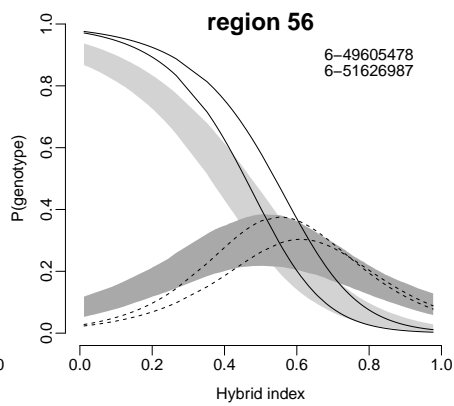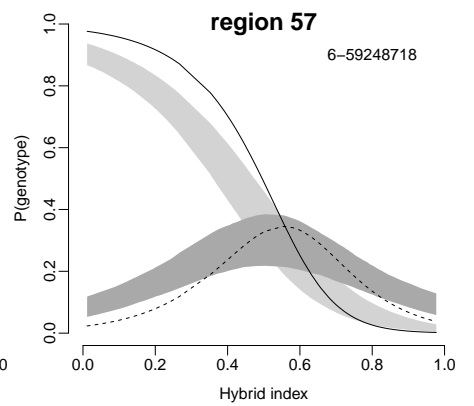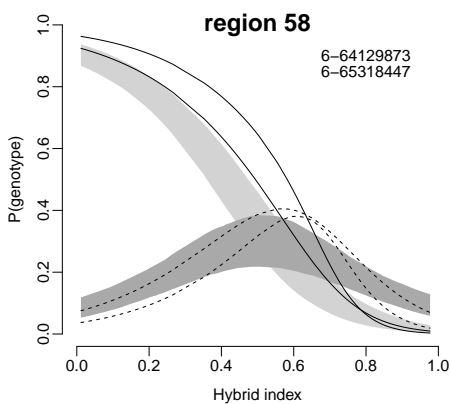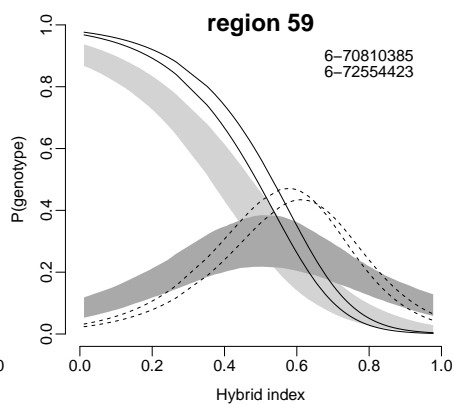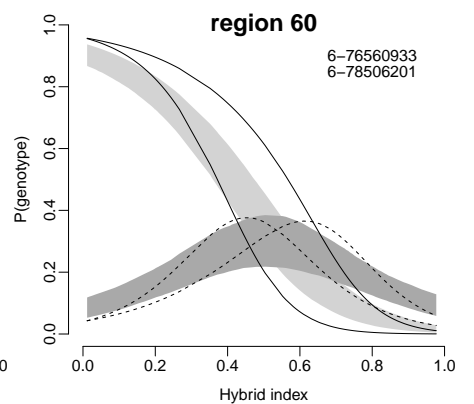



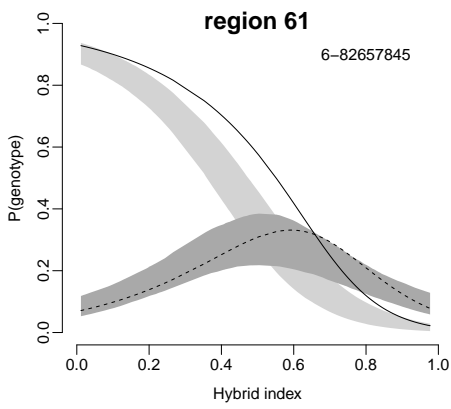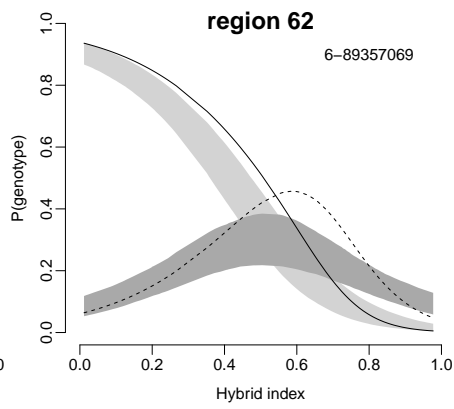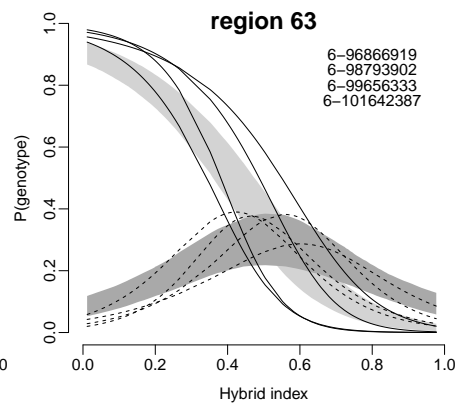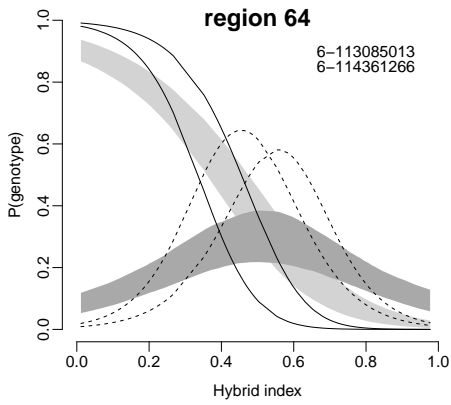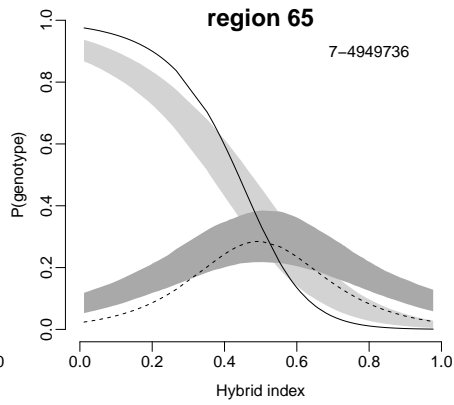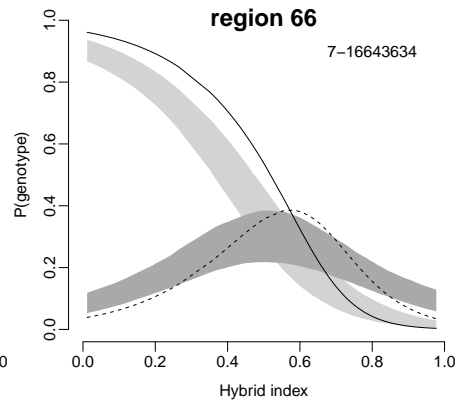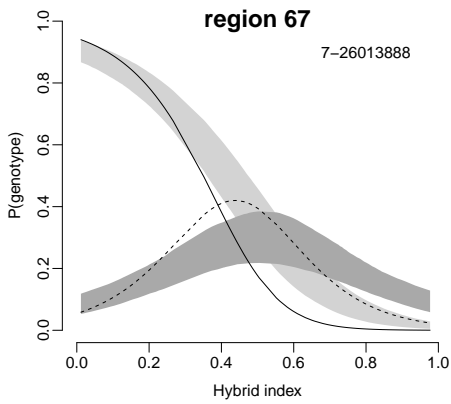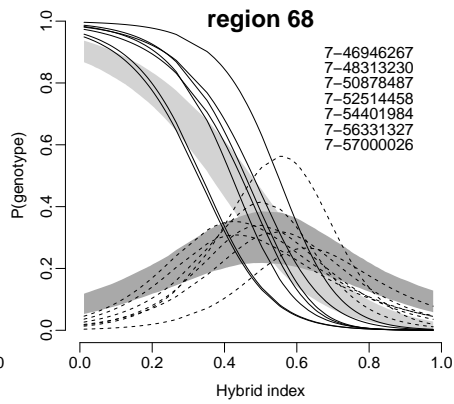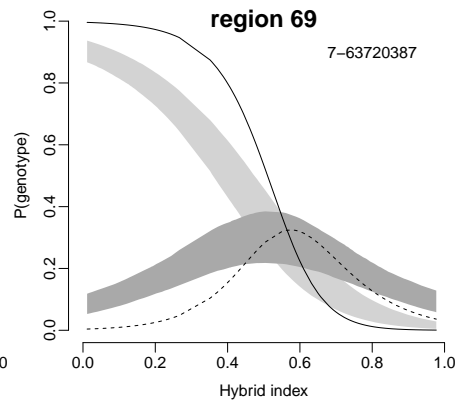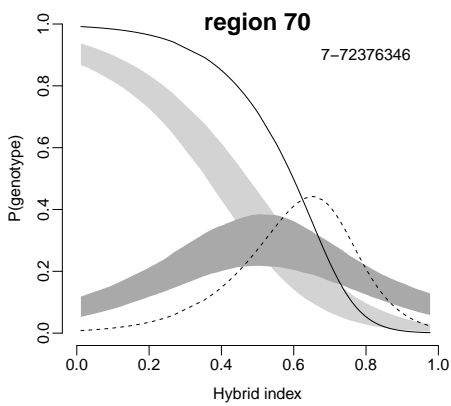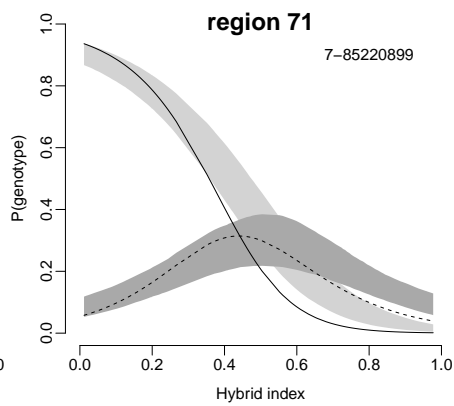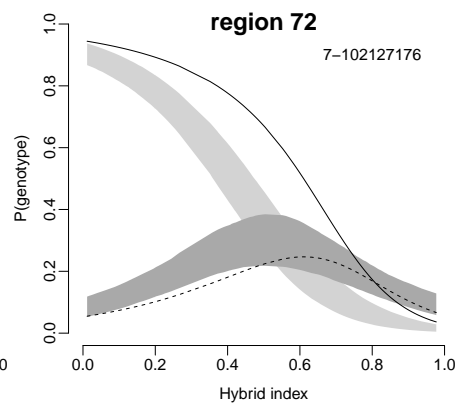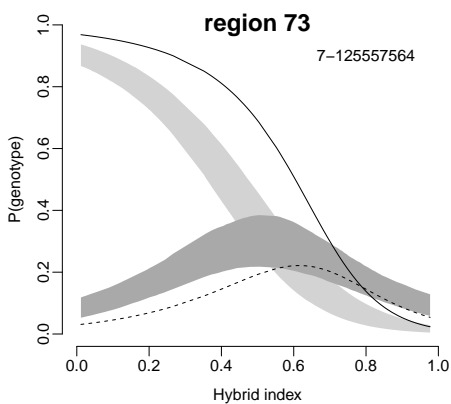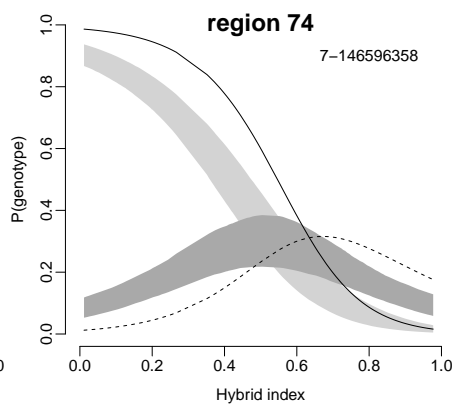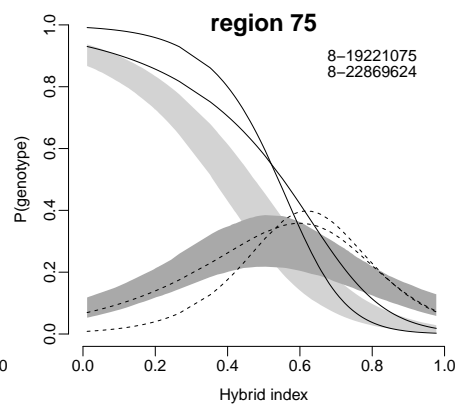

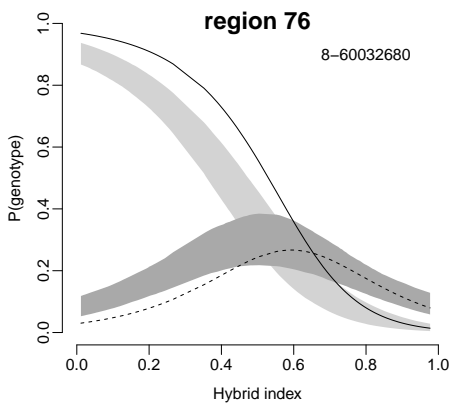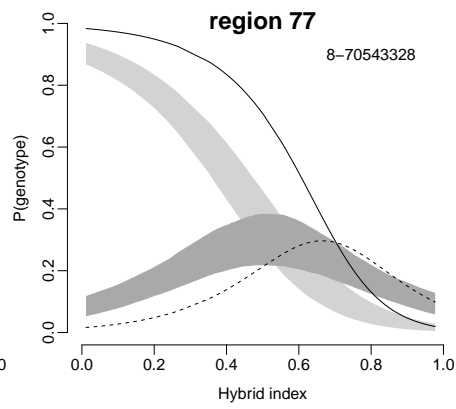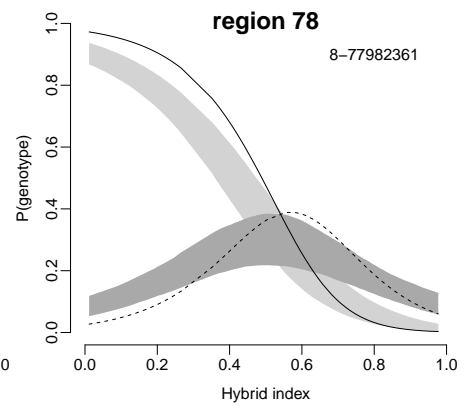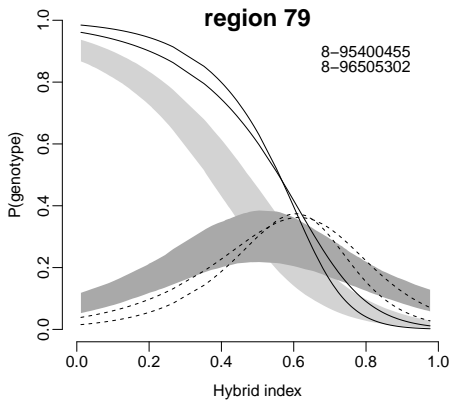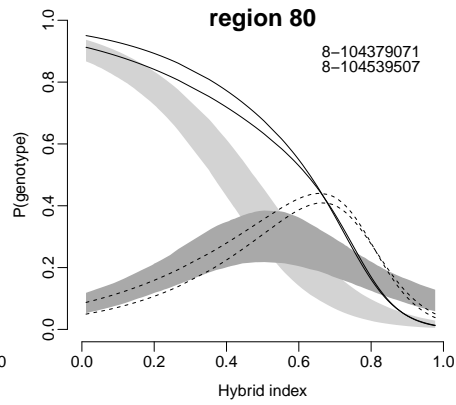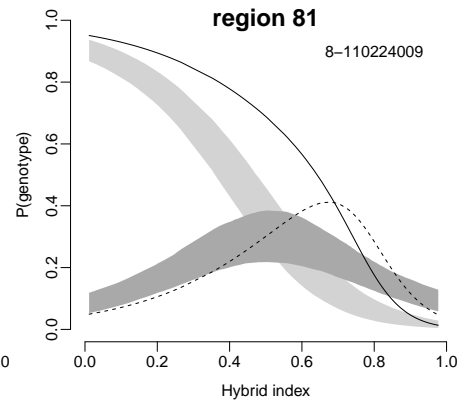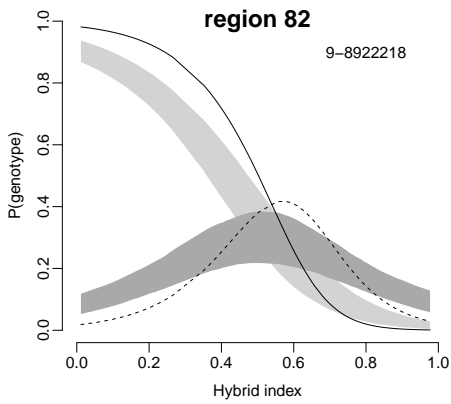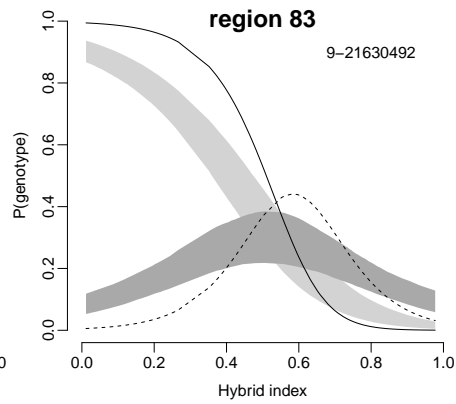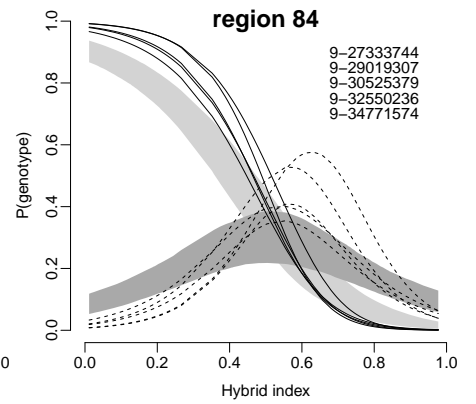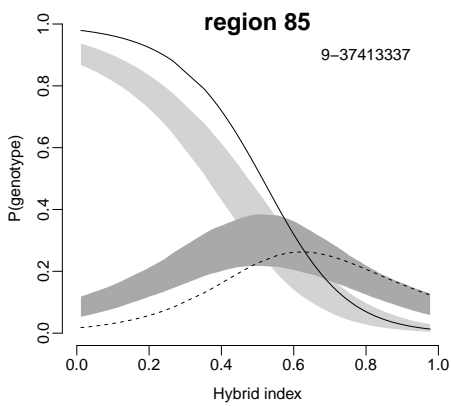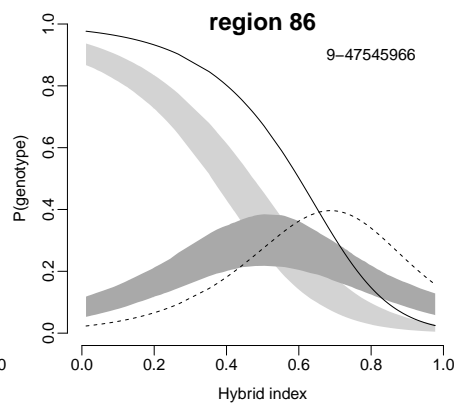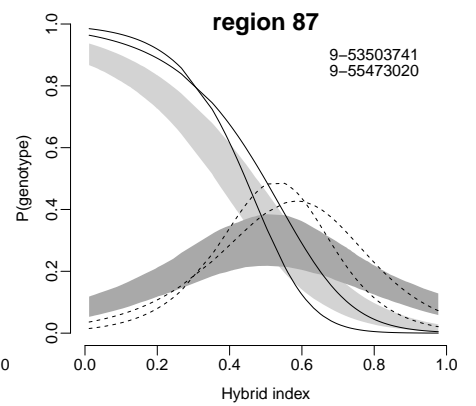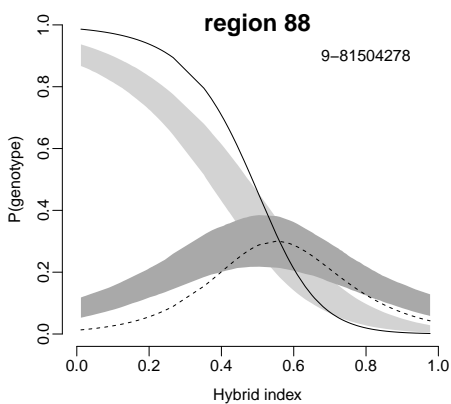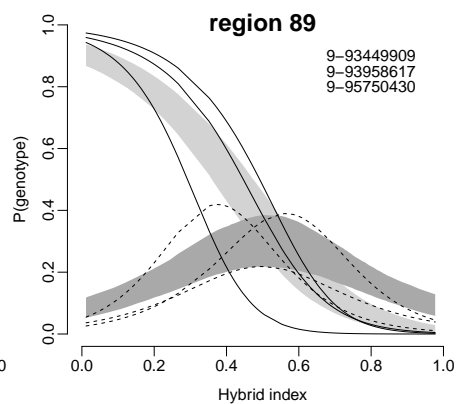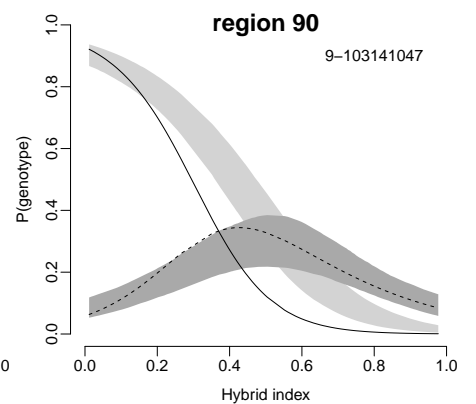

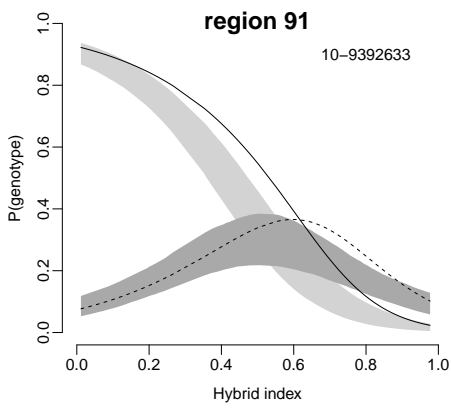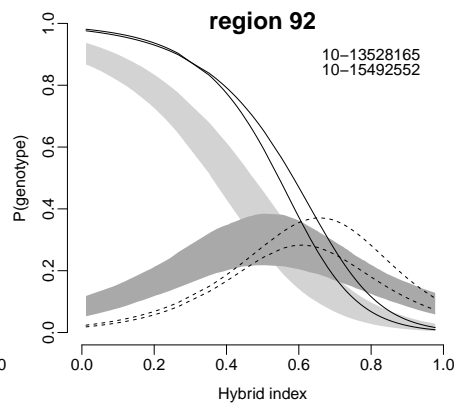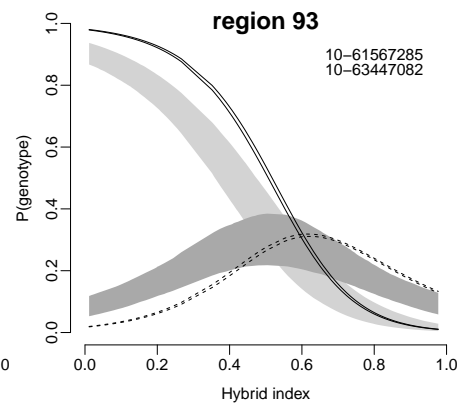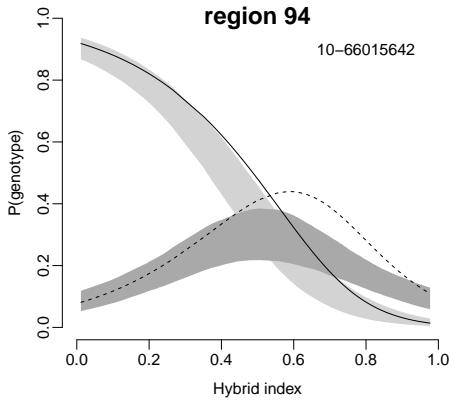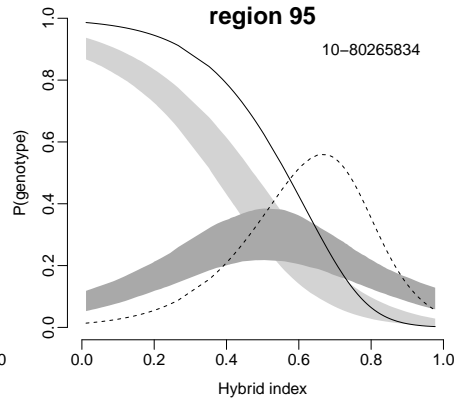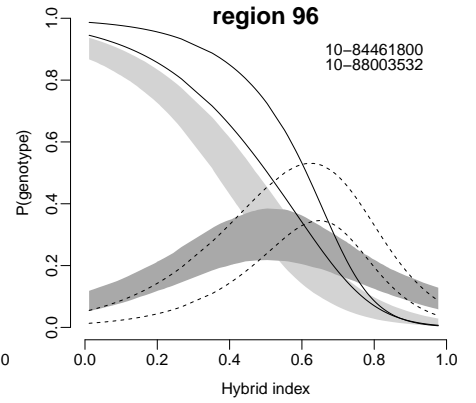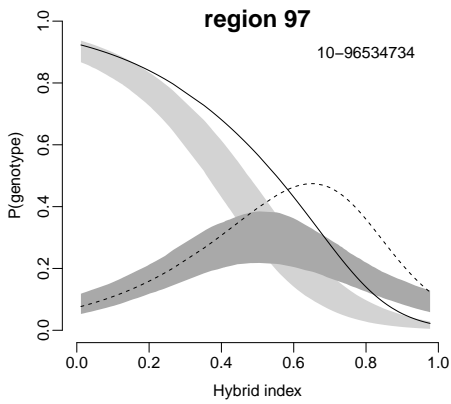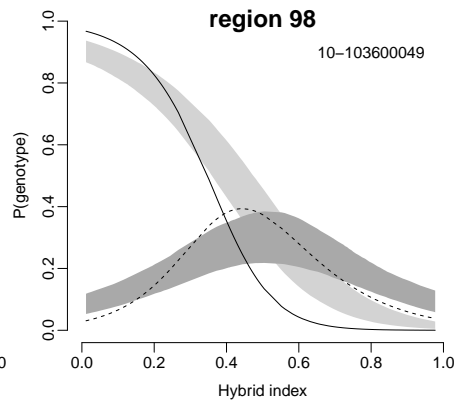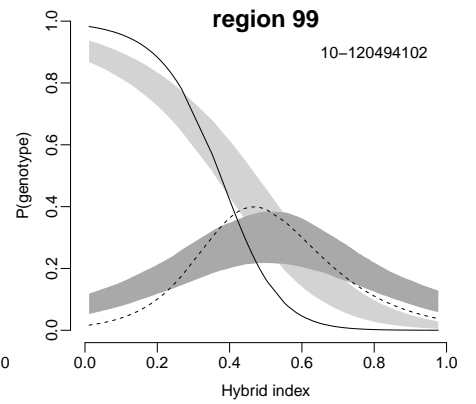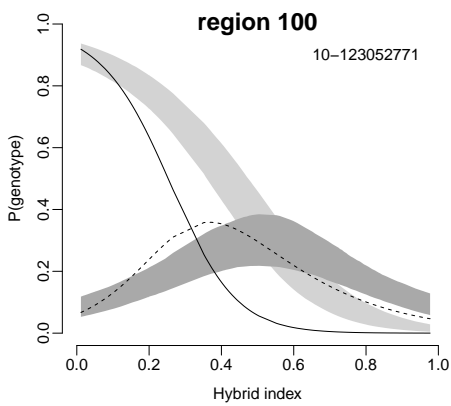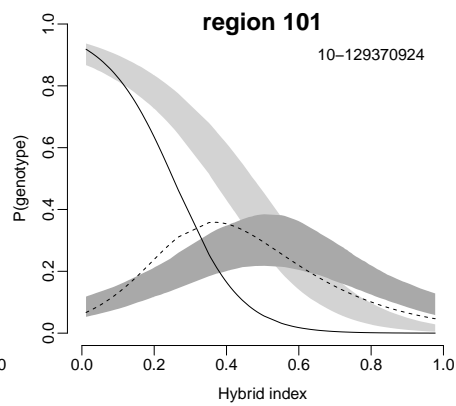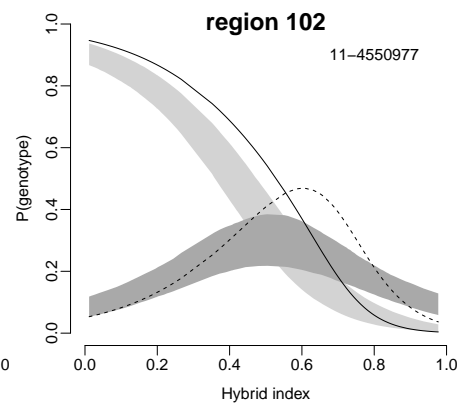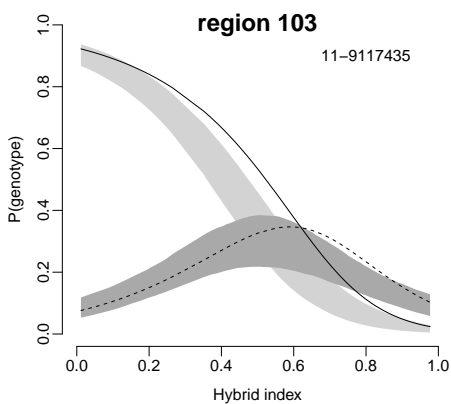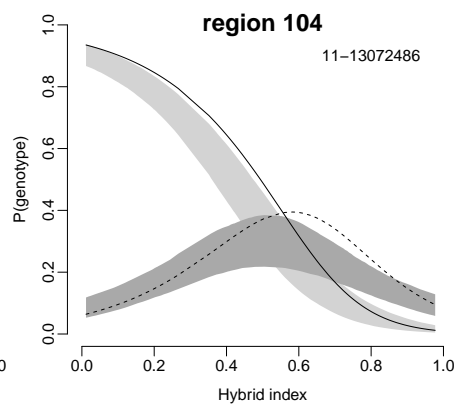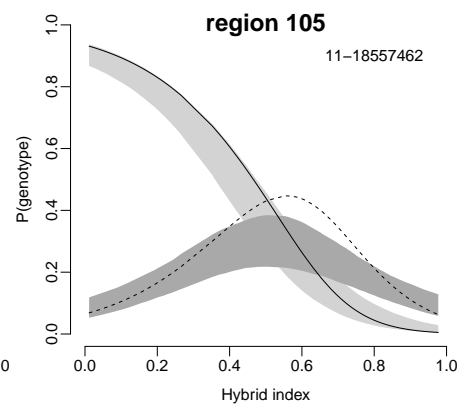

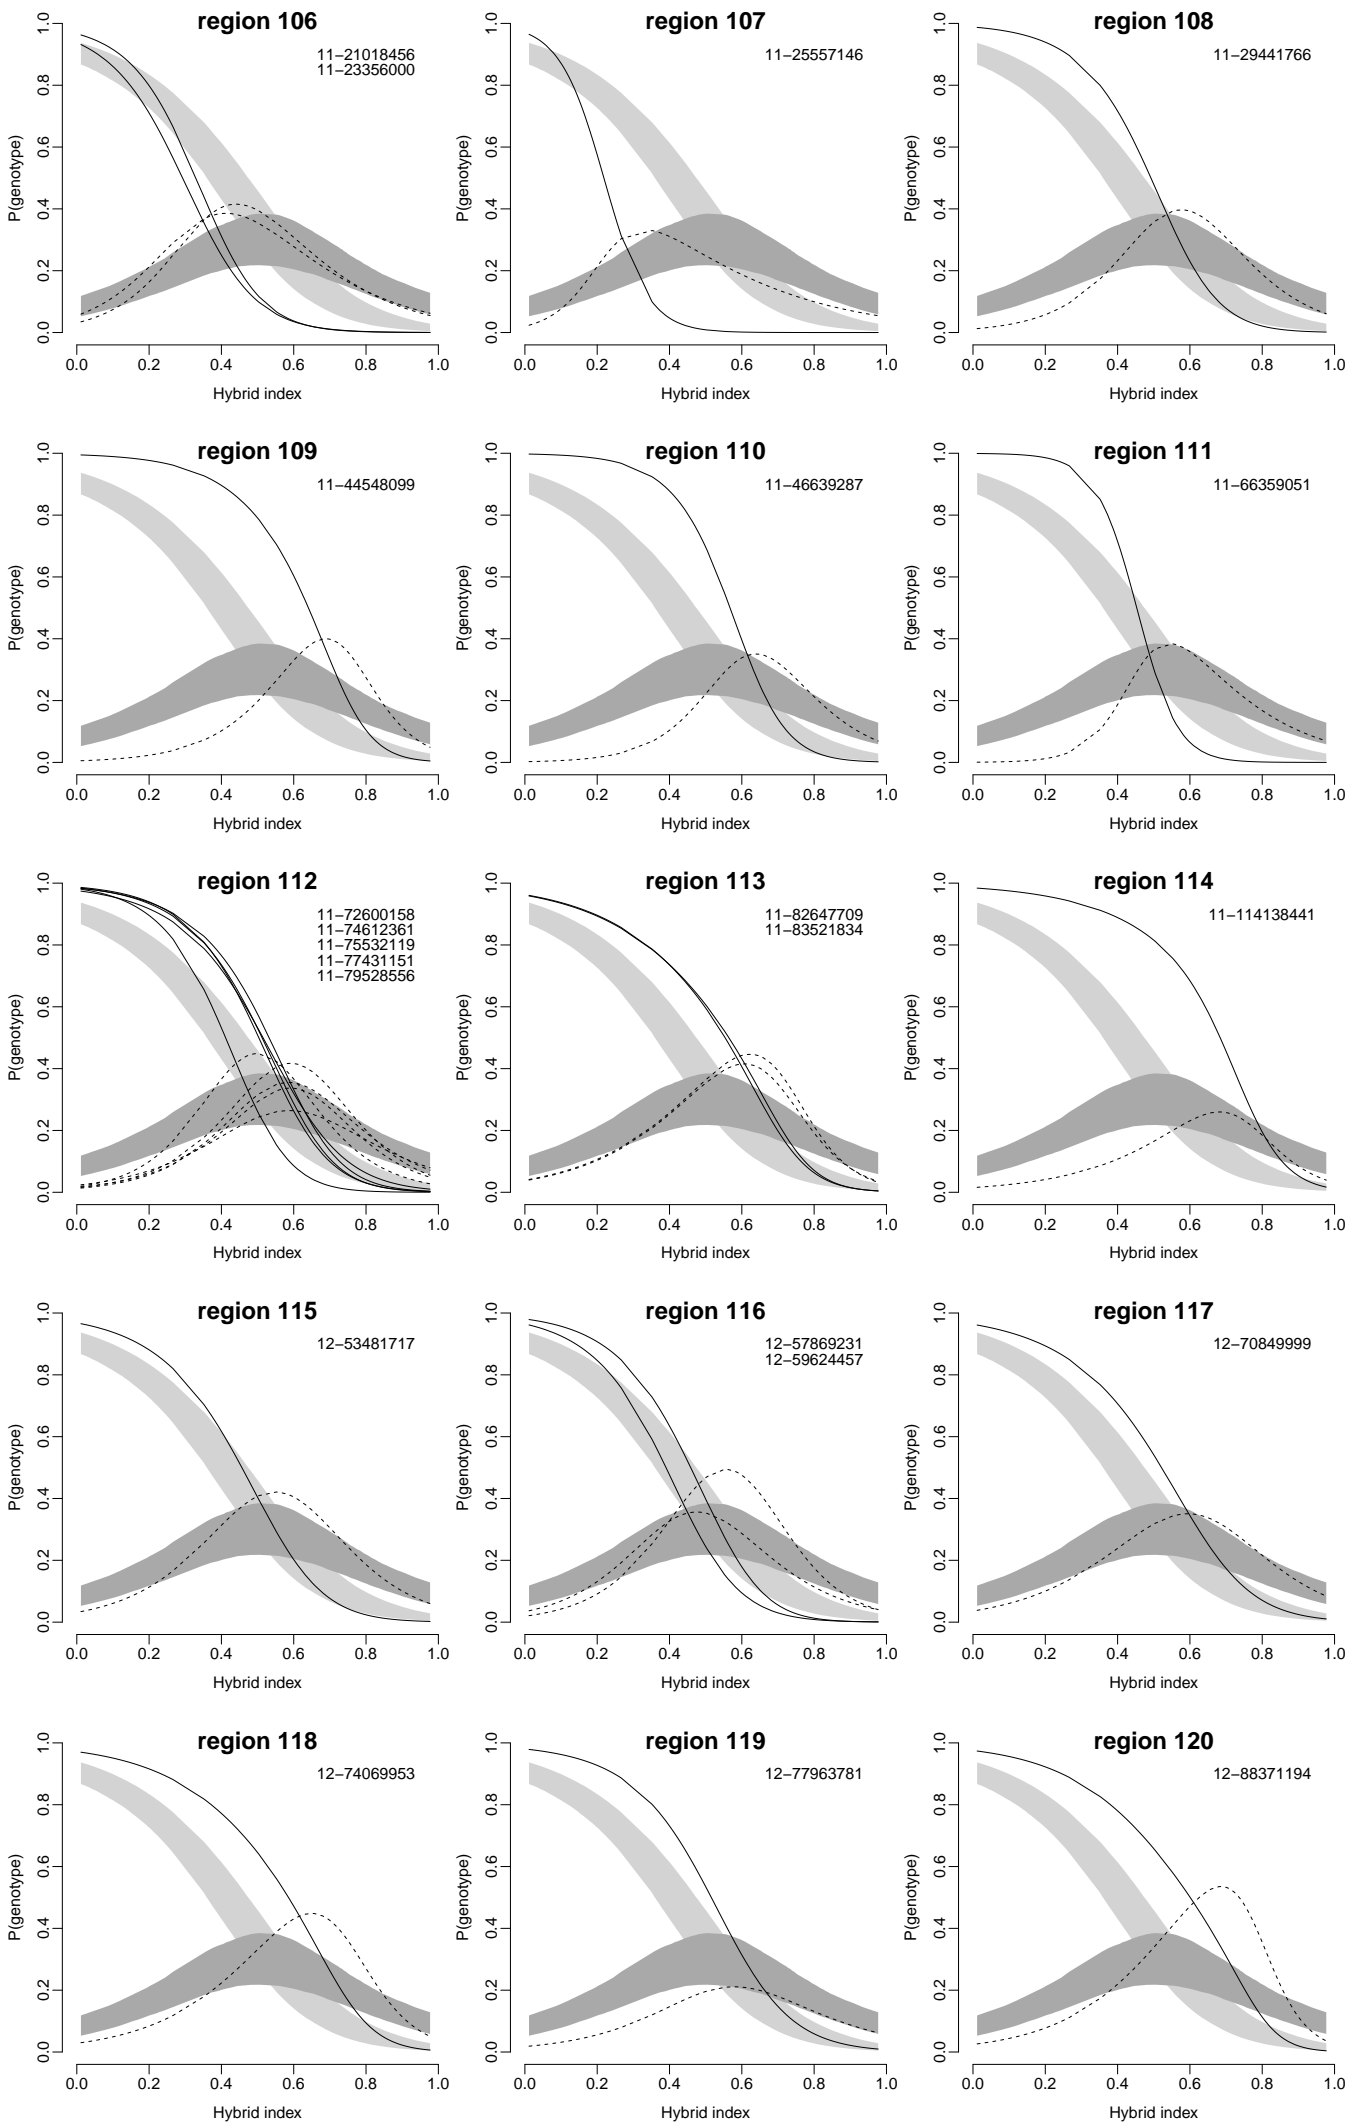

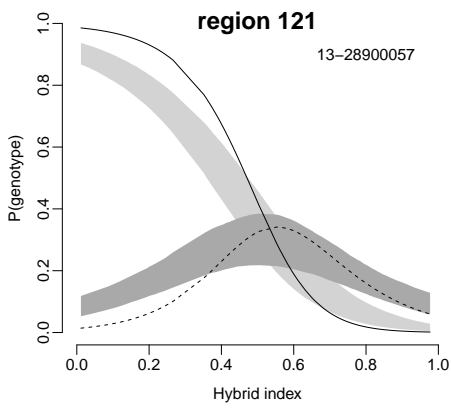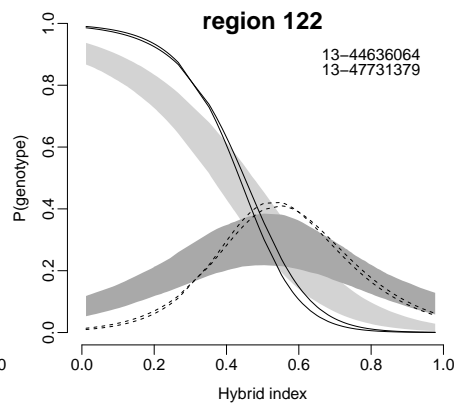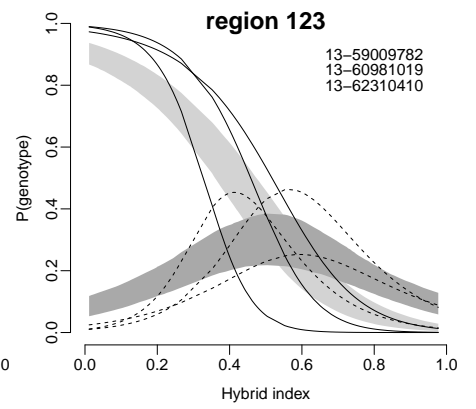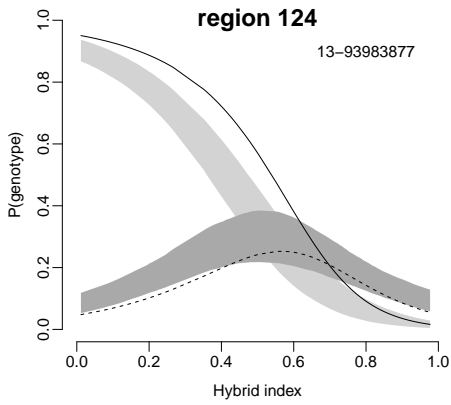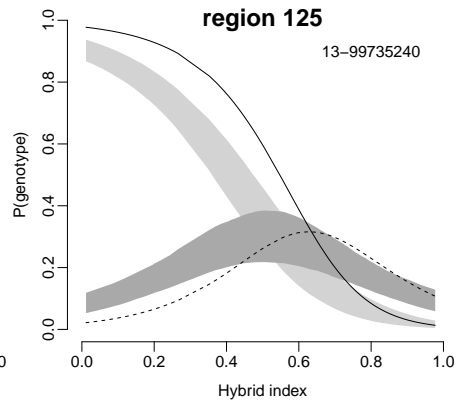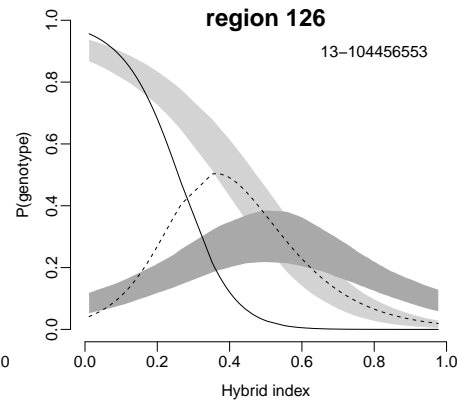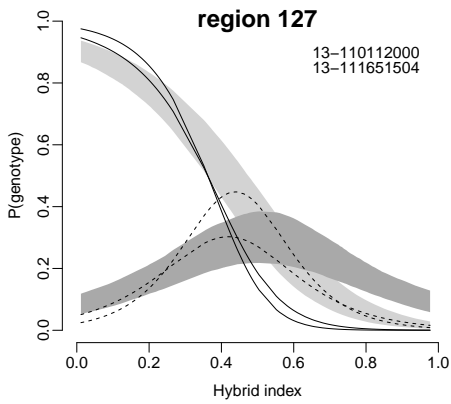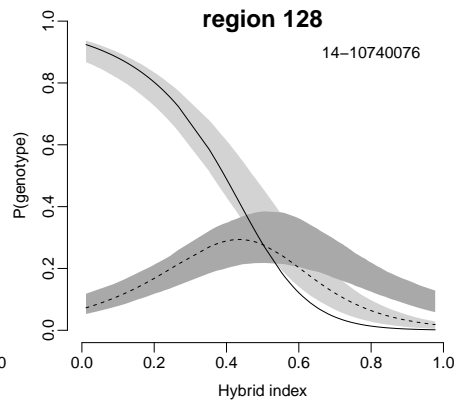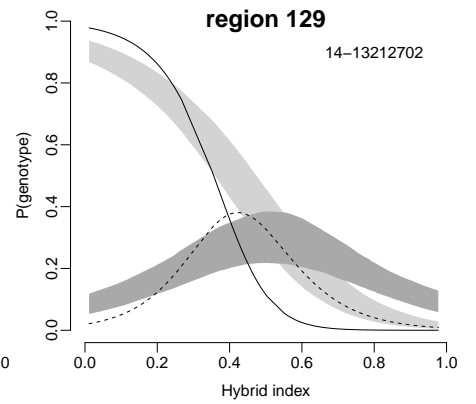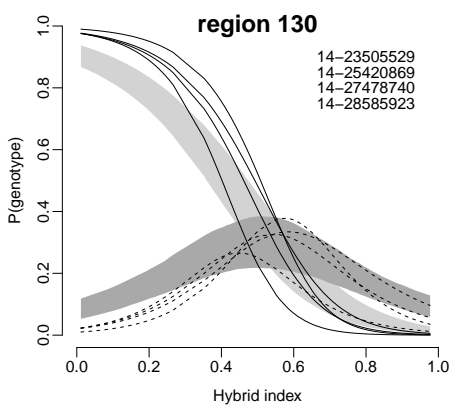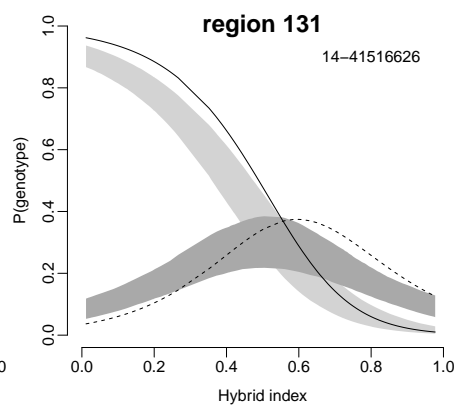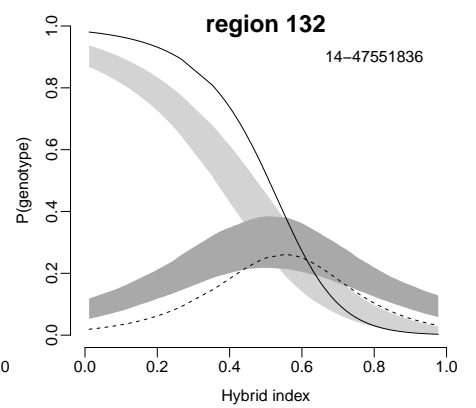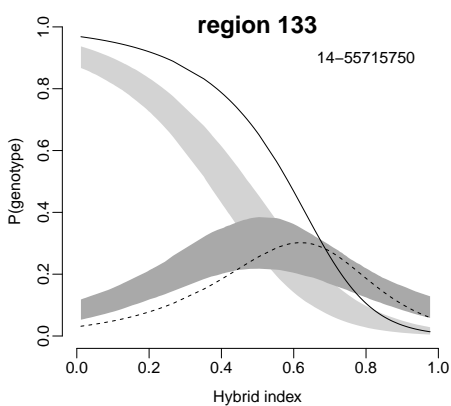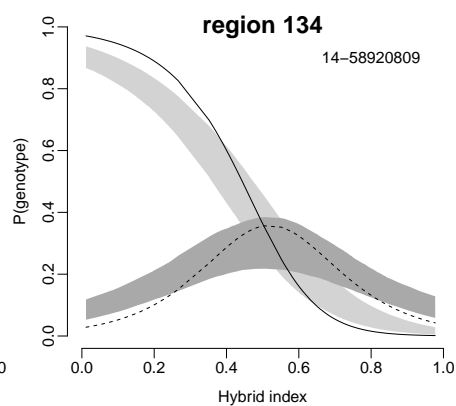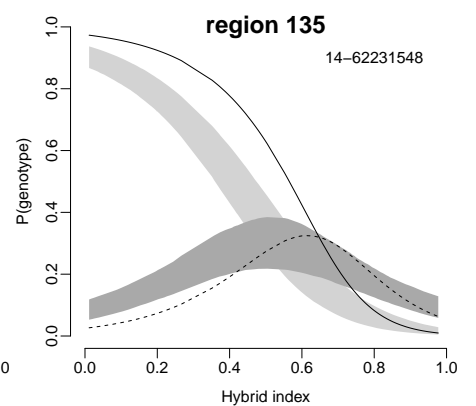

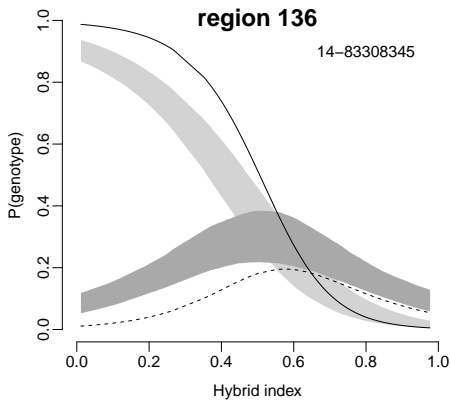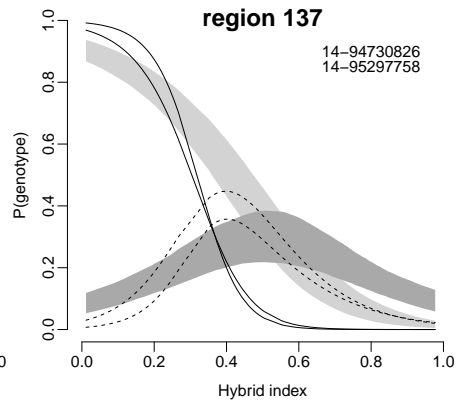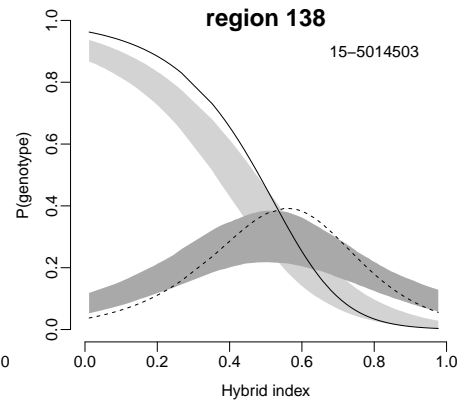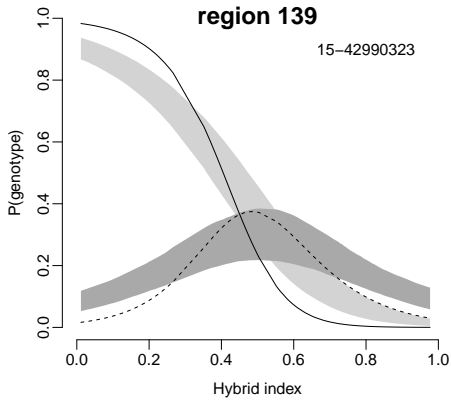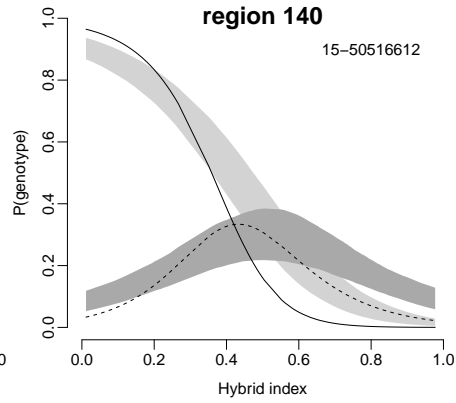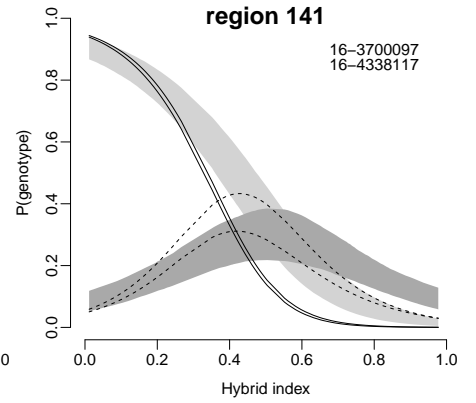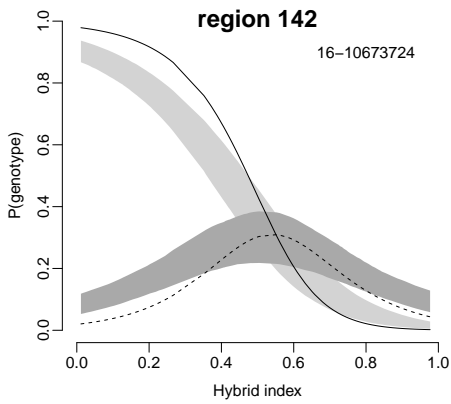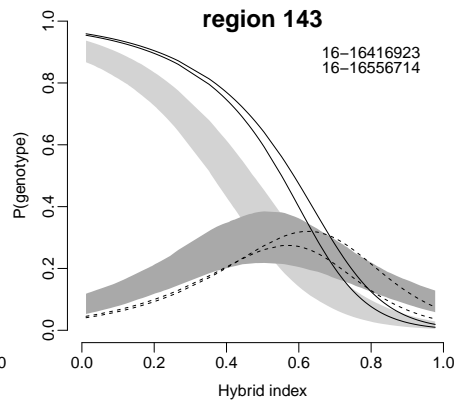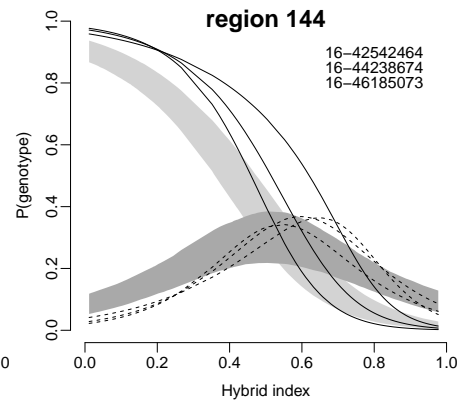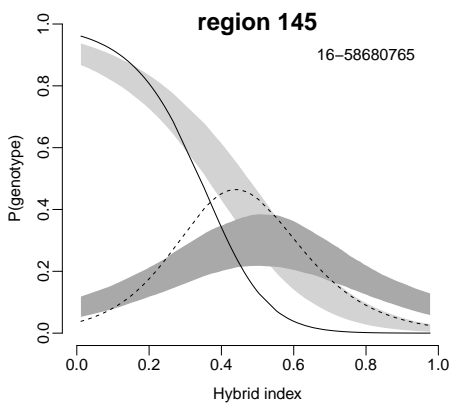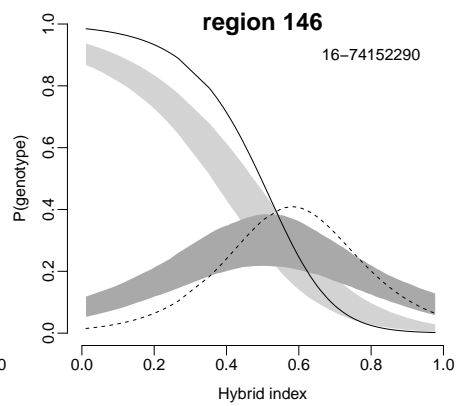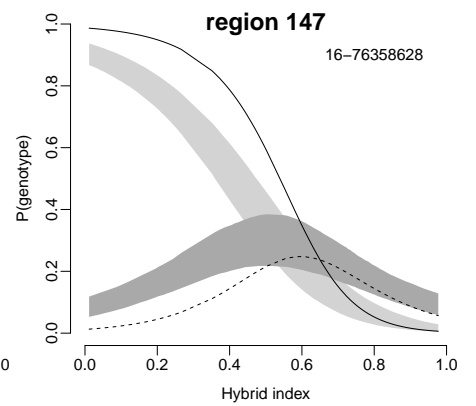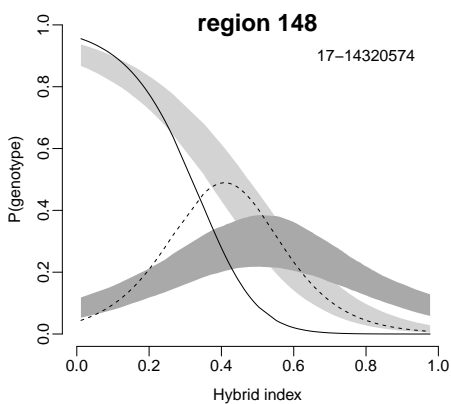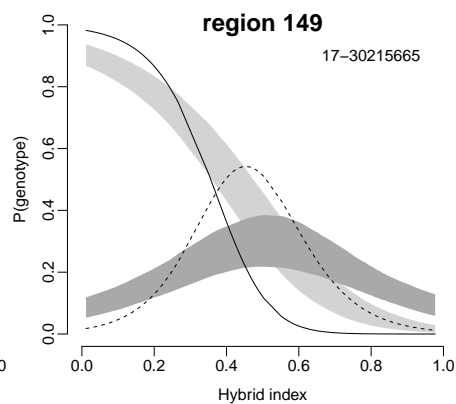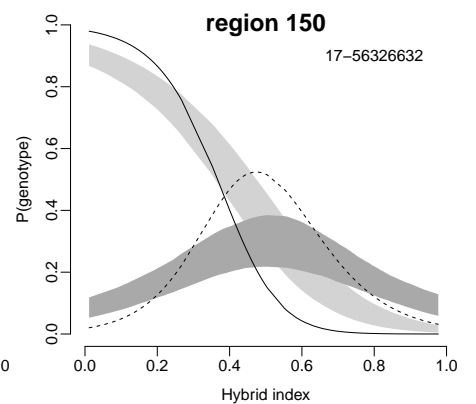

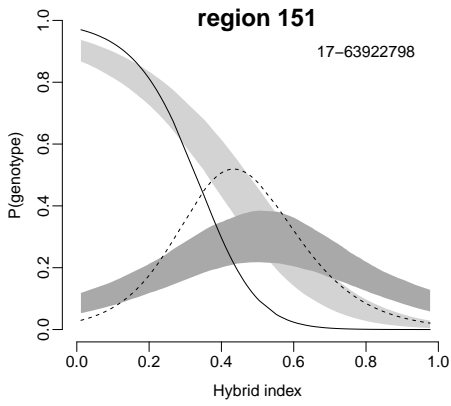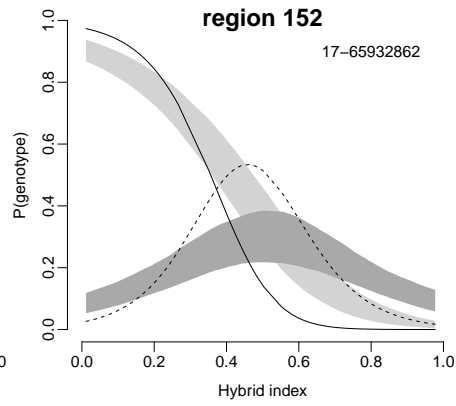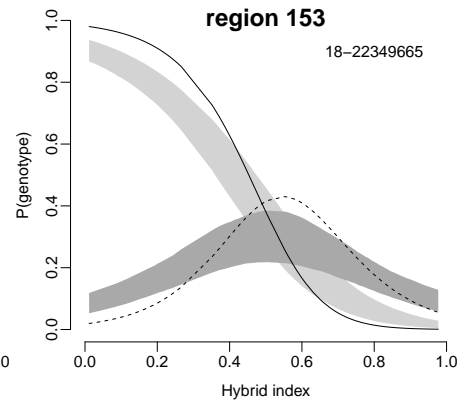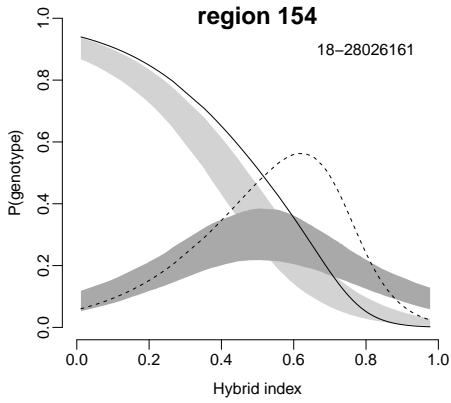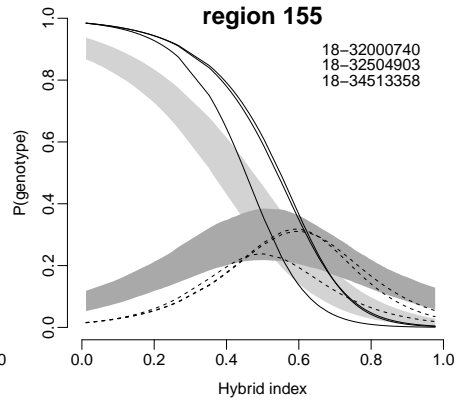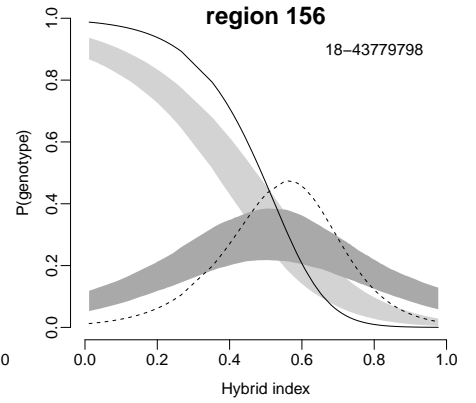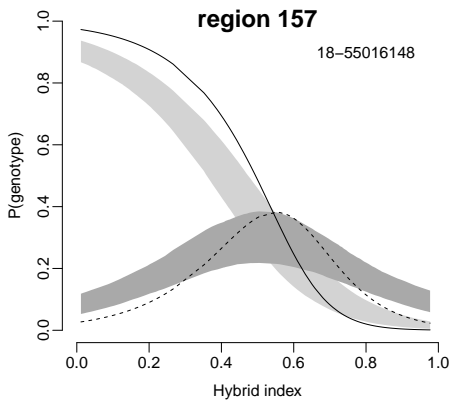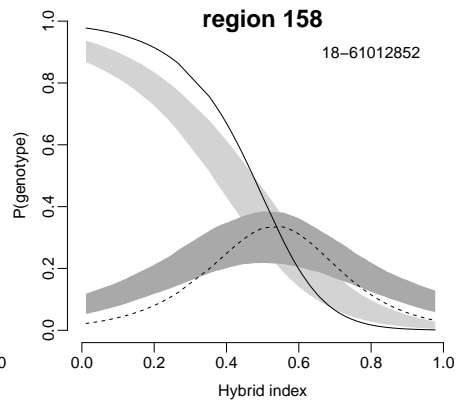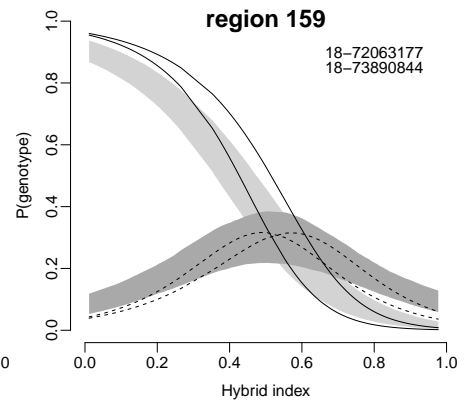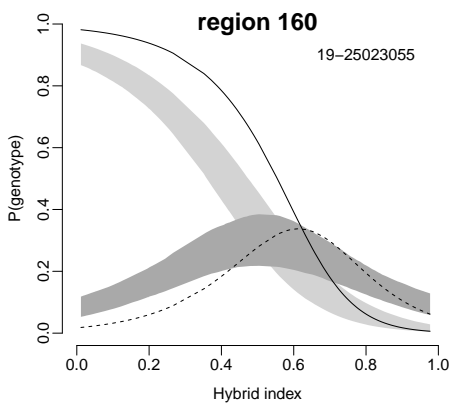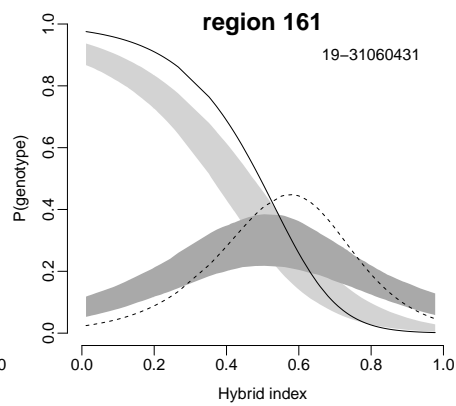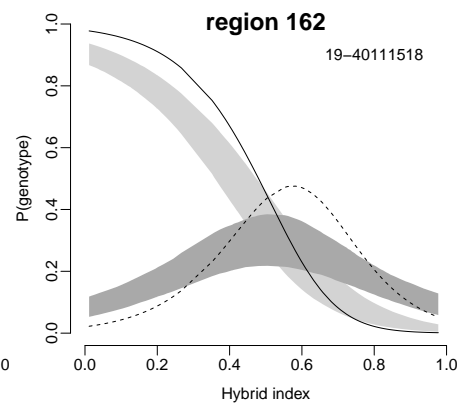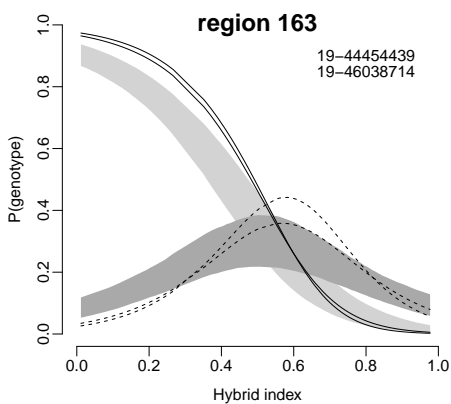

Supplement: NIHMS544236-supplement-Fig_S3a.pdf [file NIHMS544236-supplement-Fig_S3a.pdf]

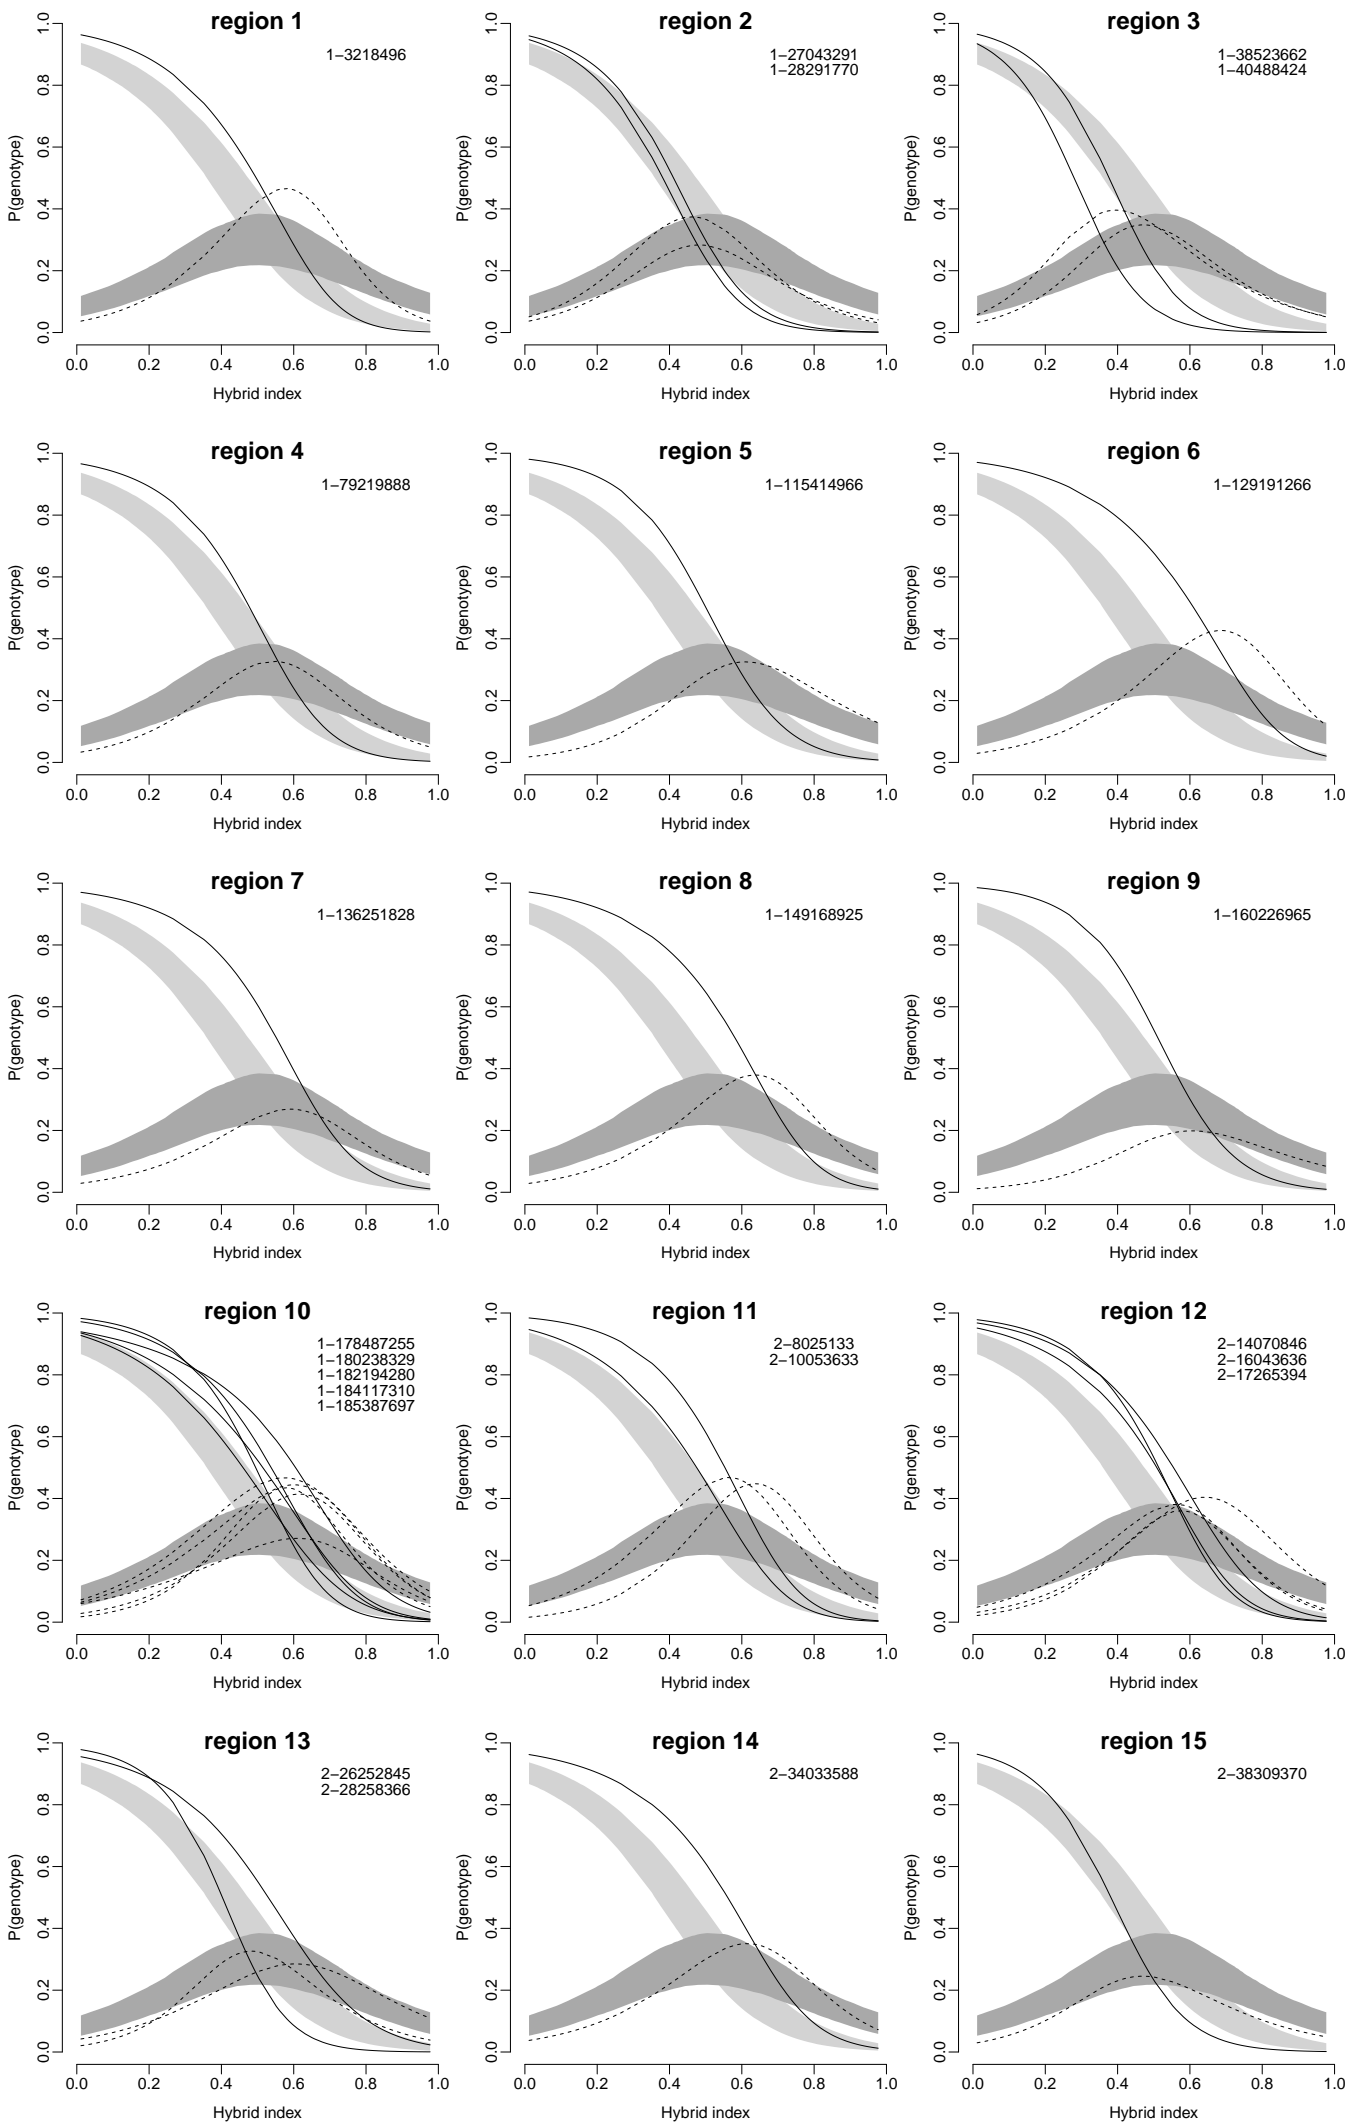

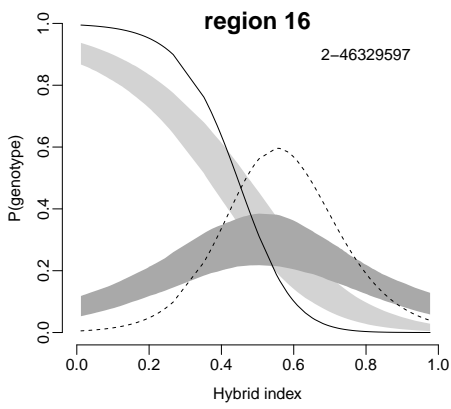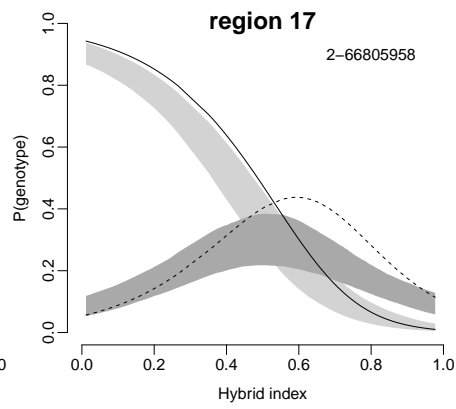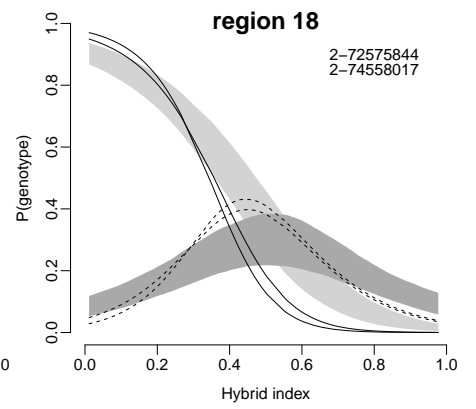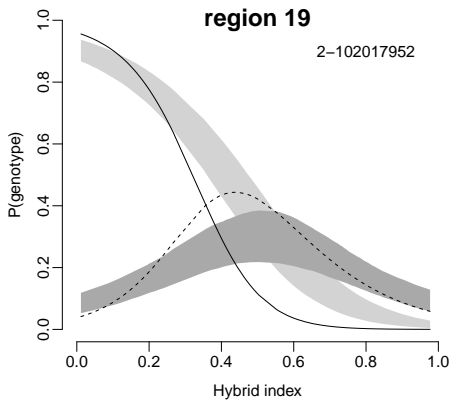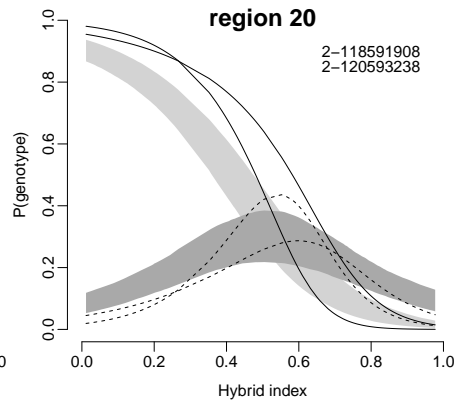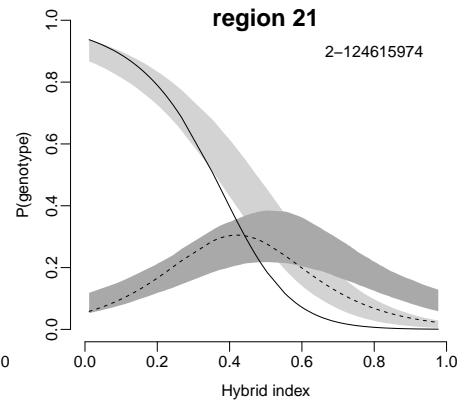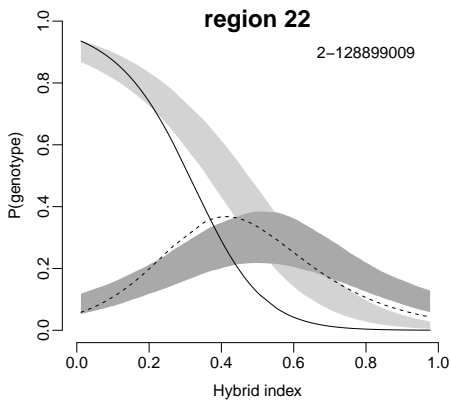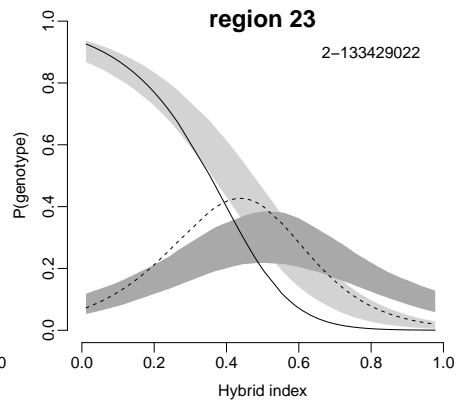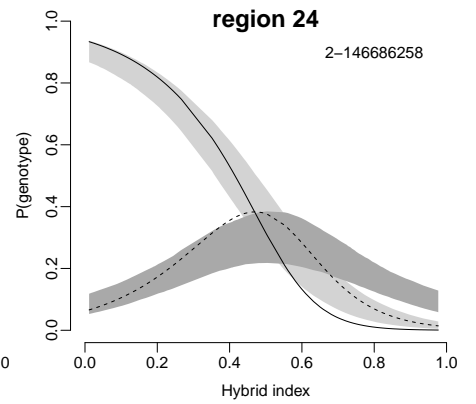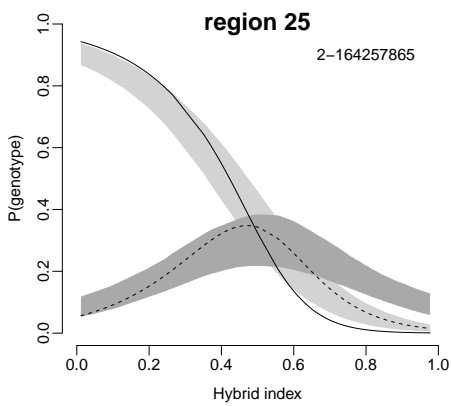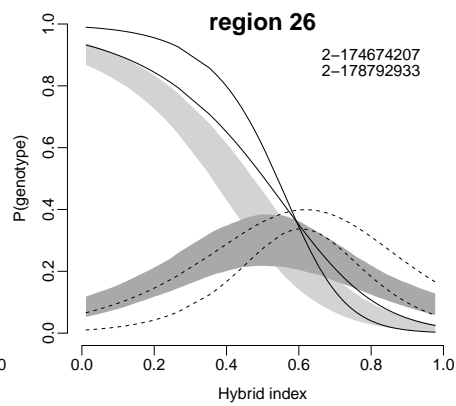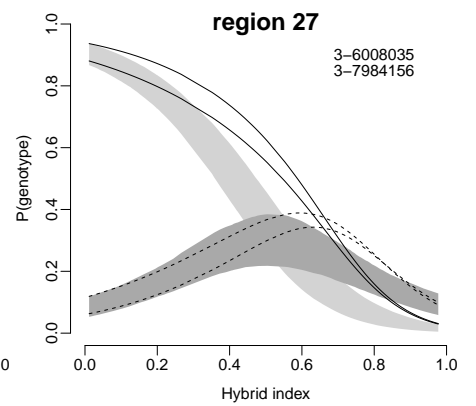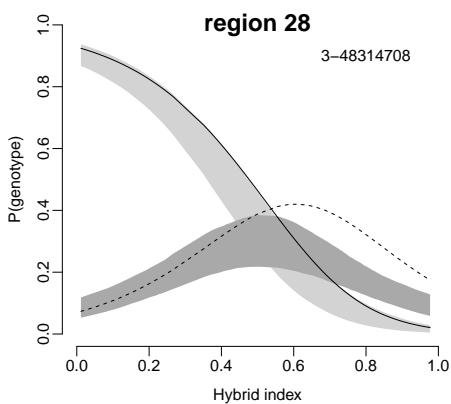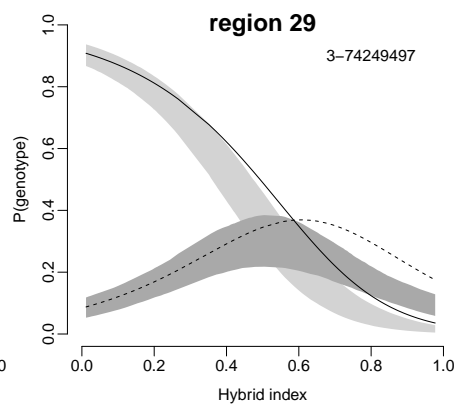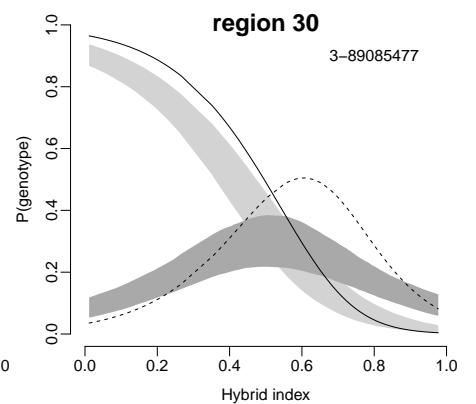

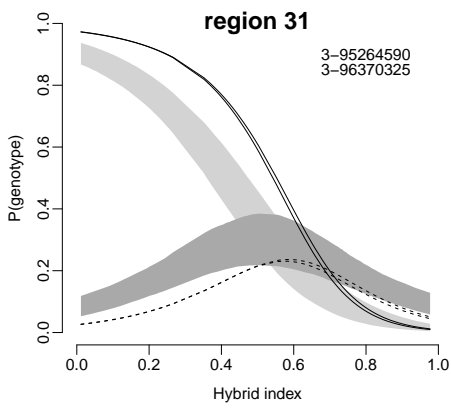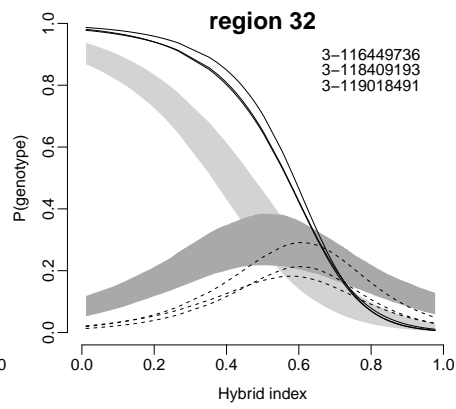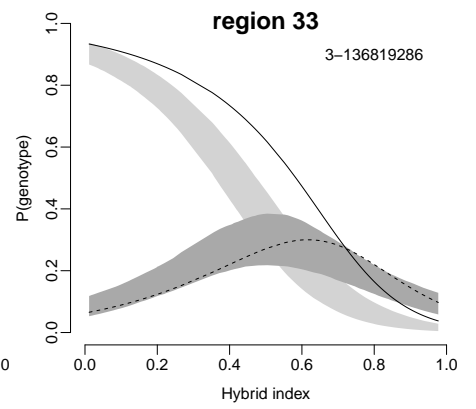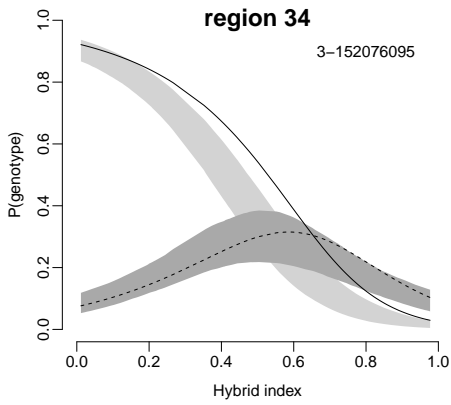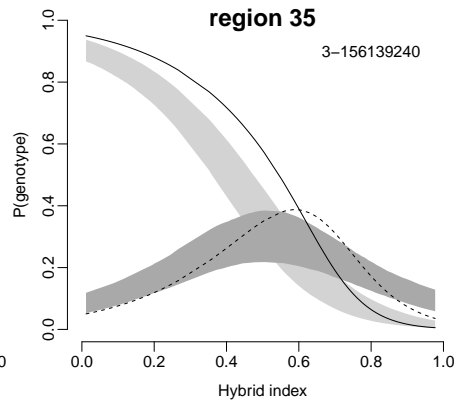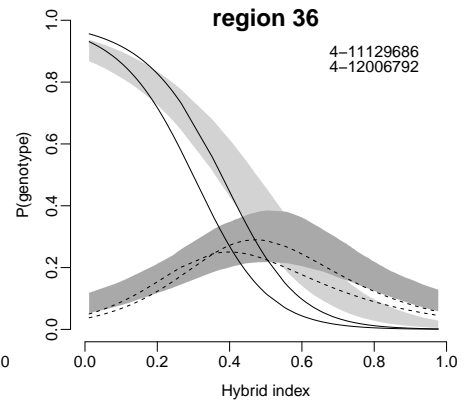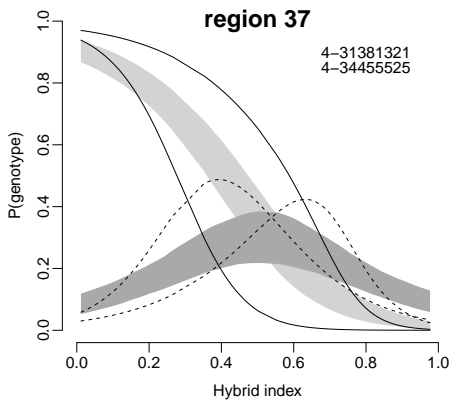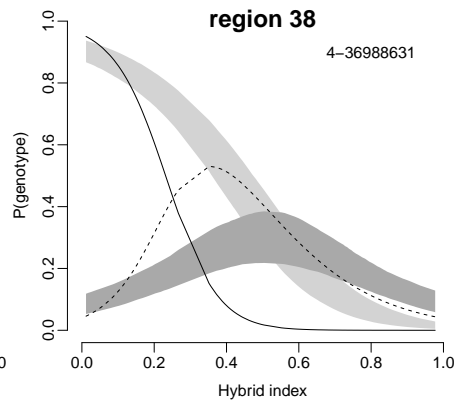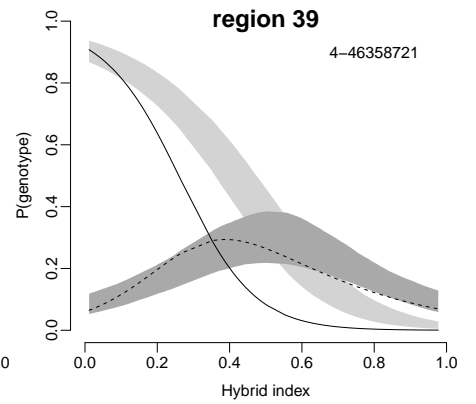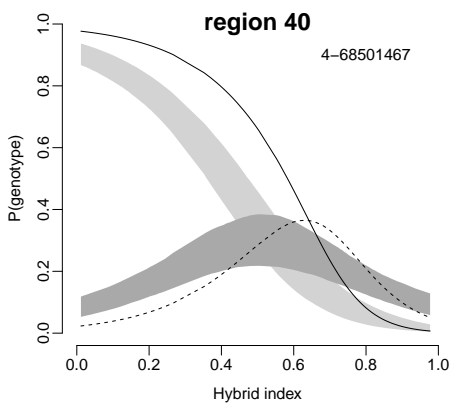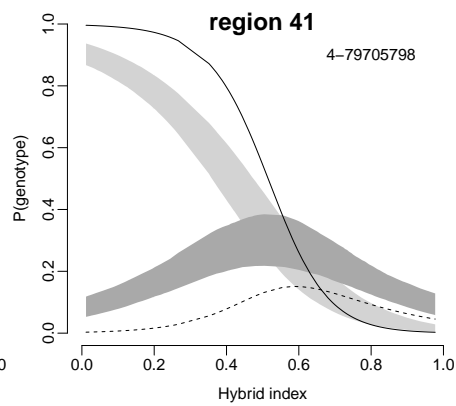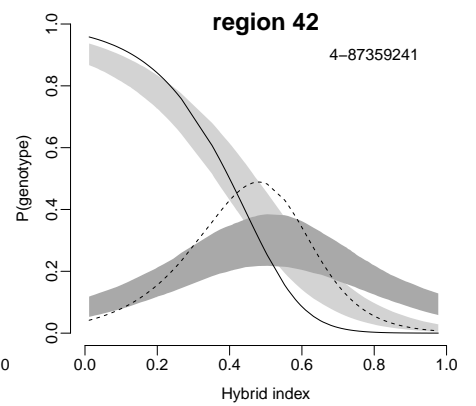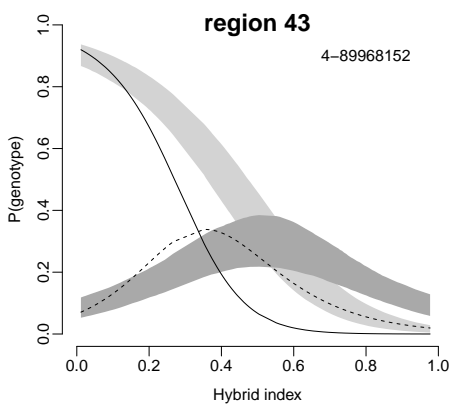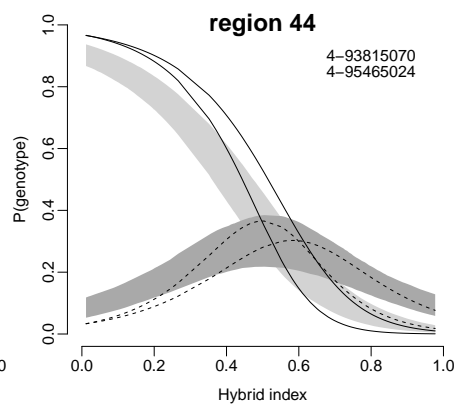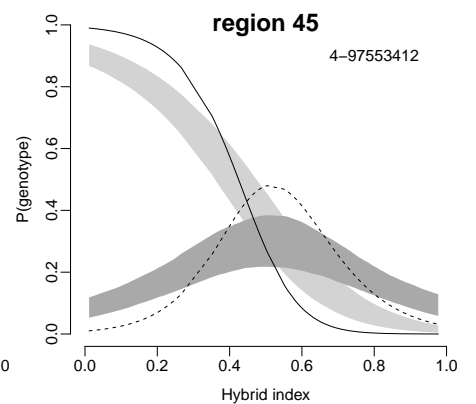

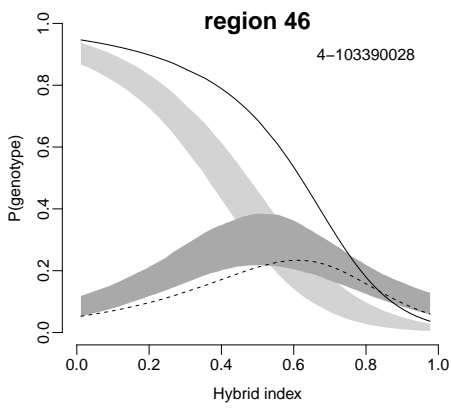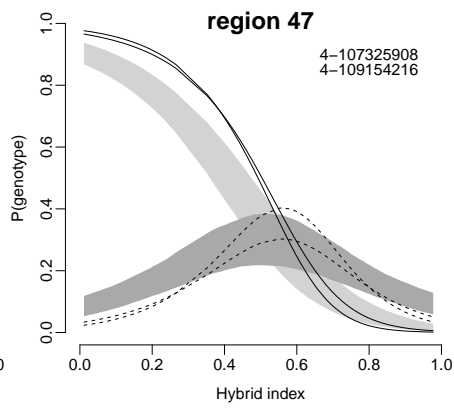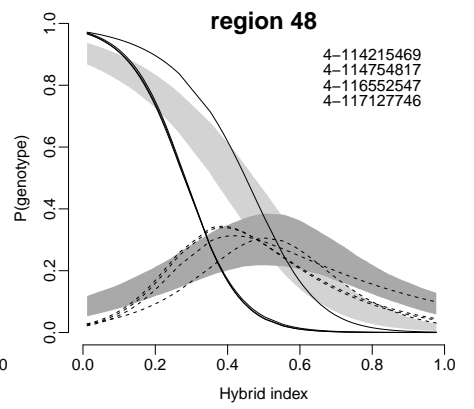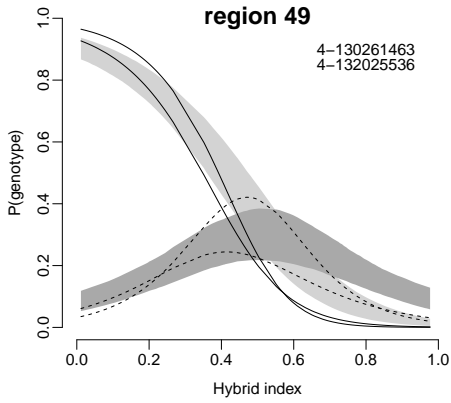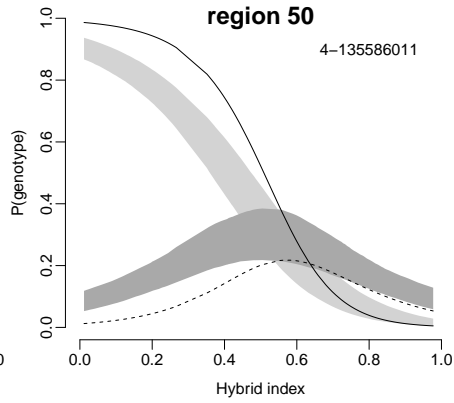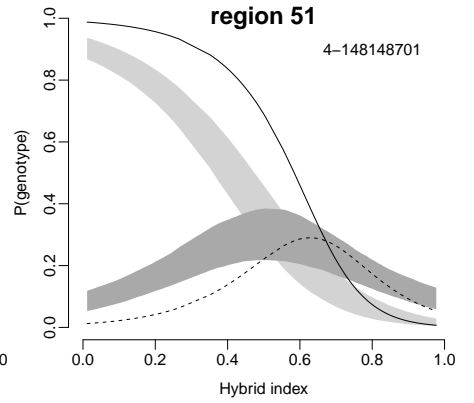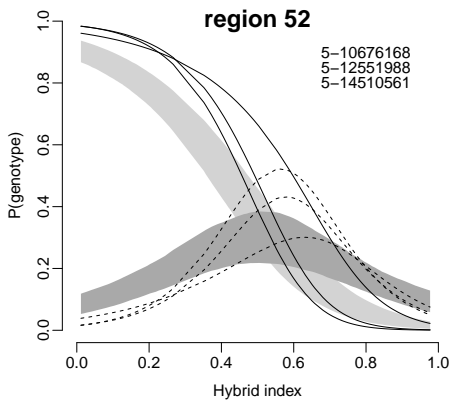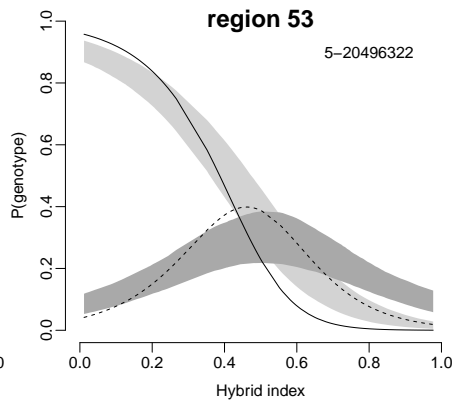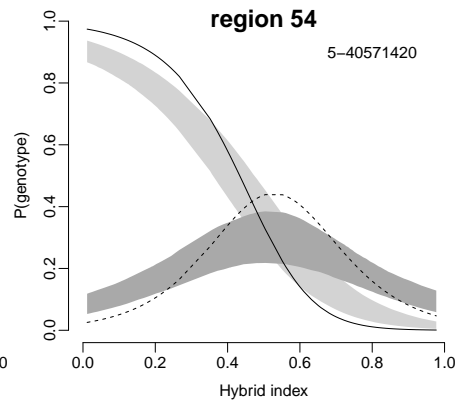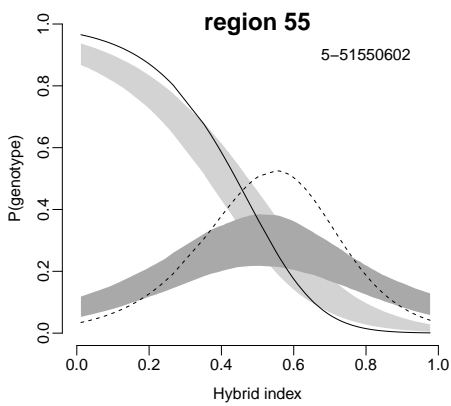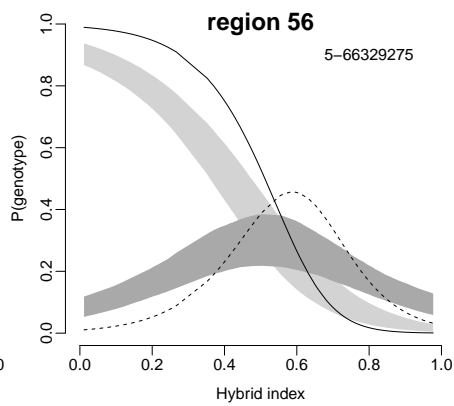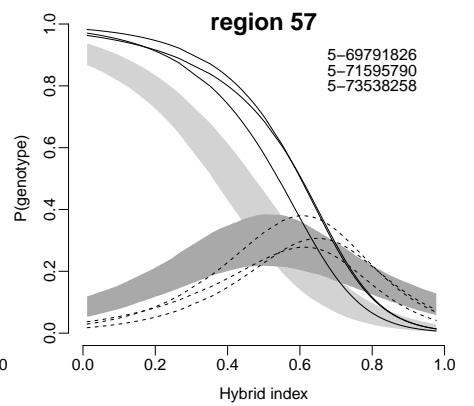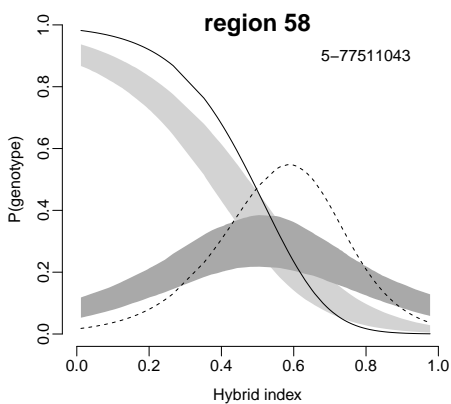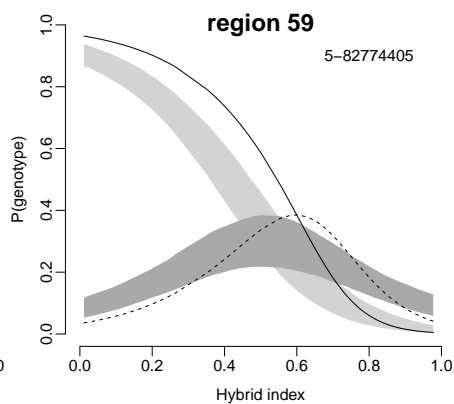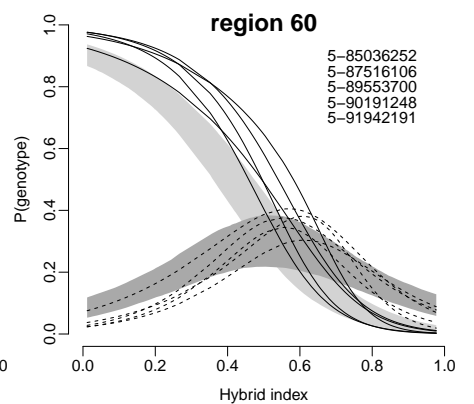

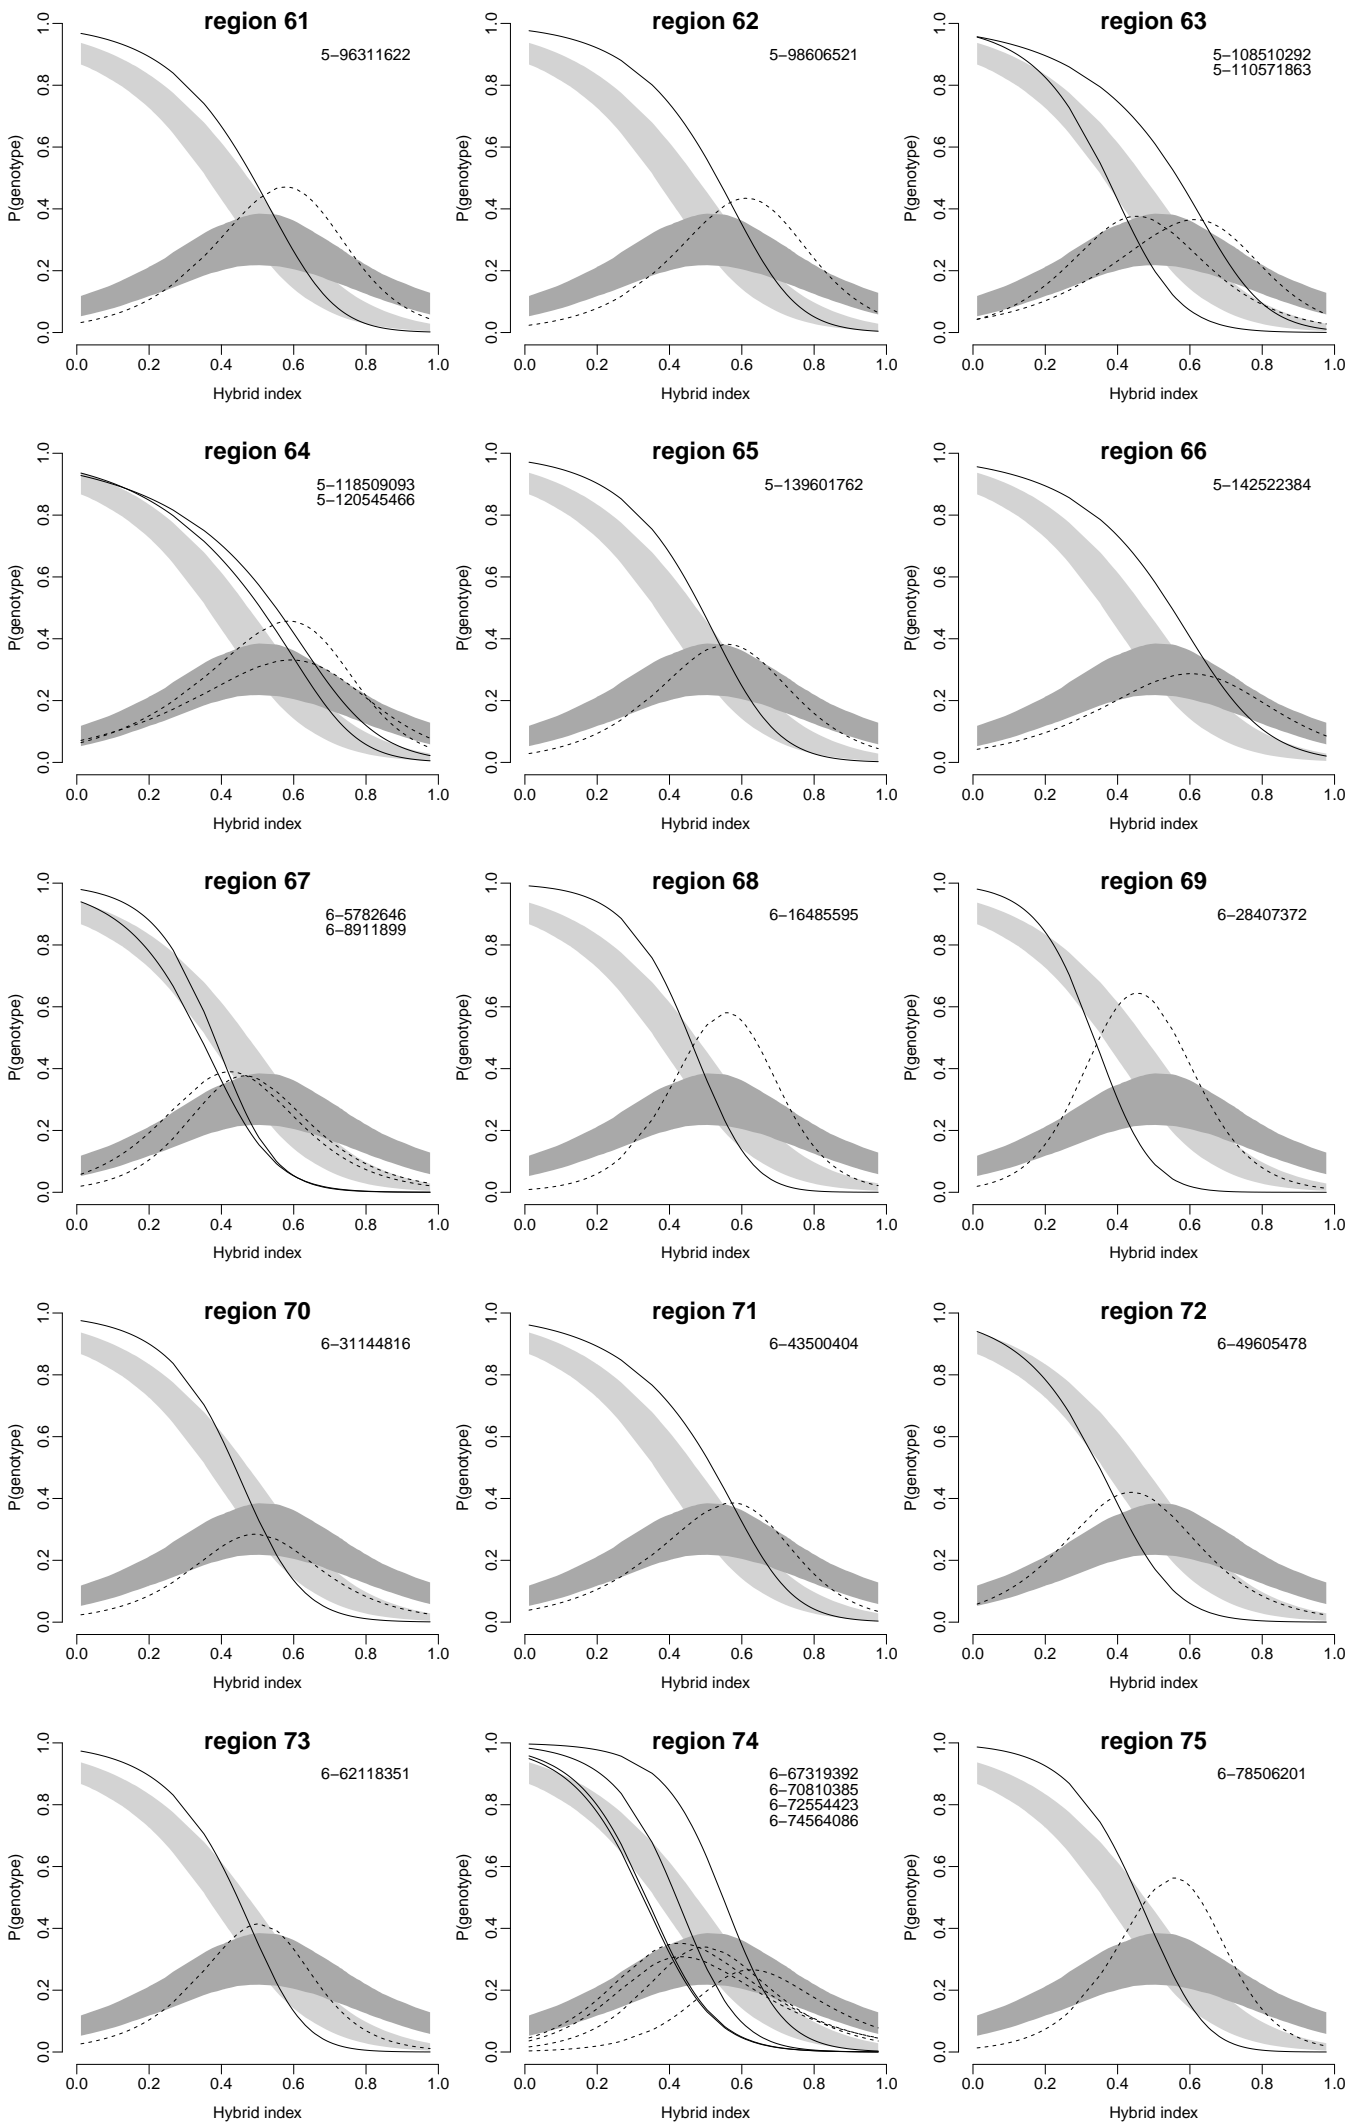

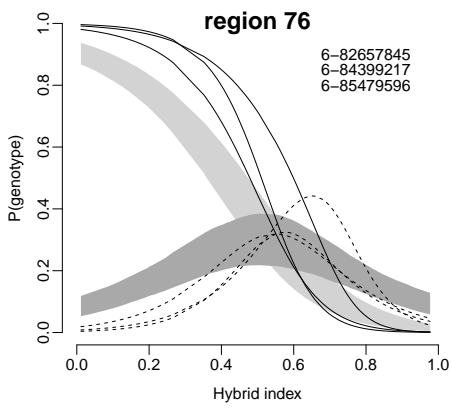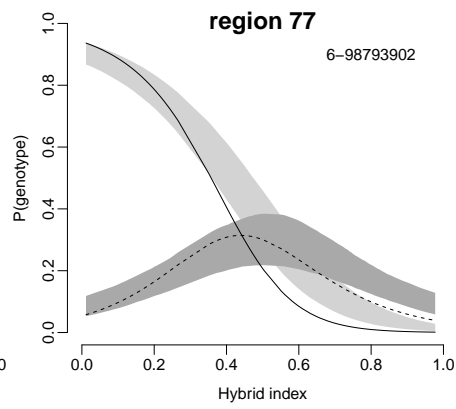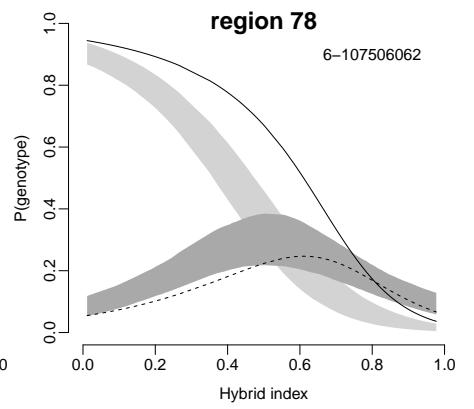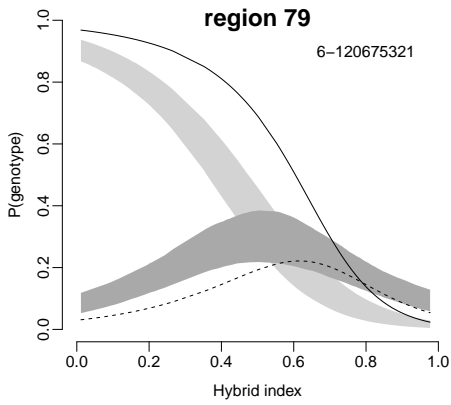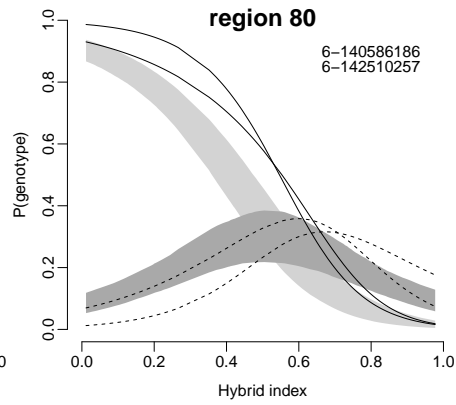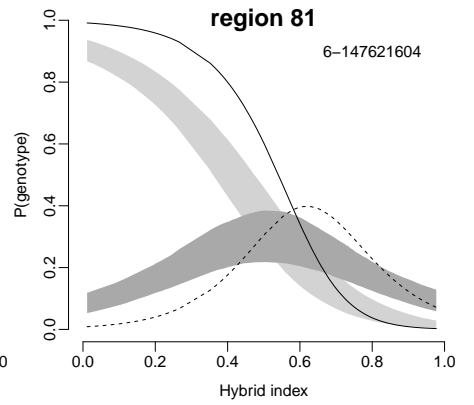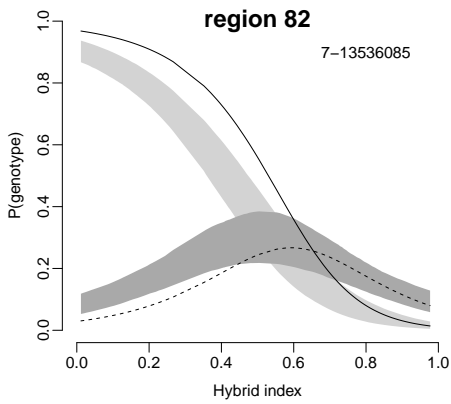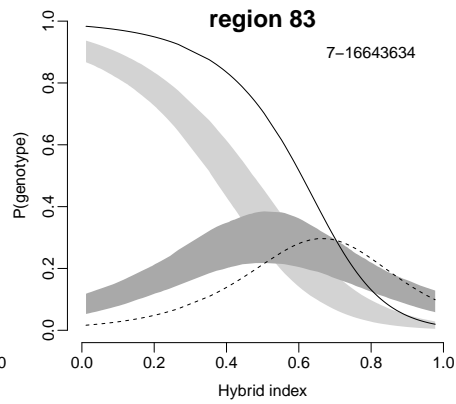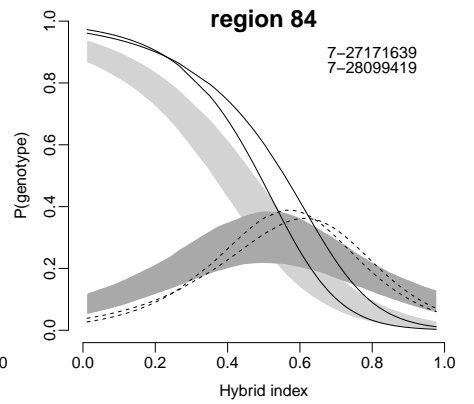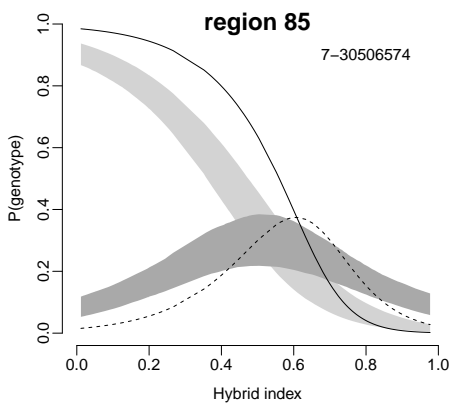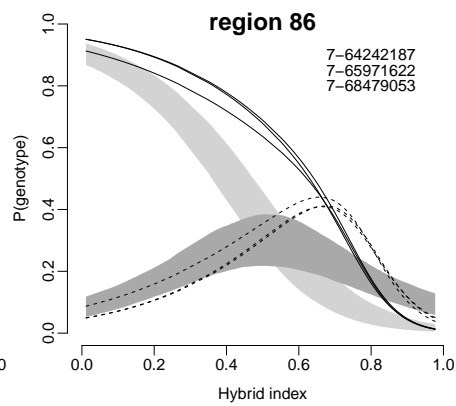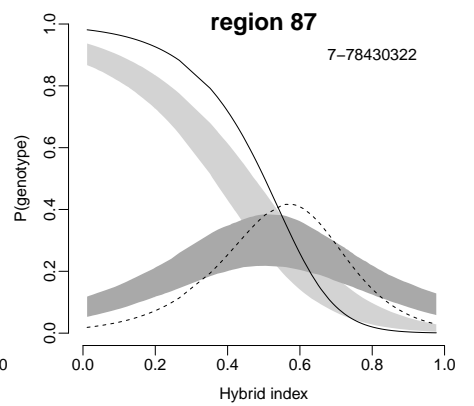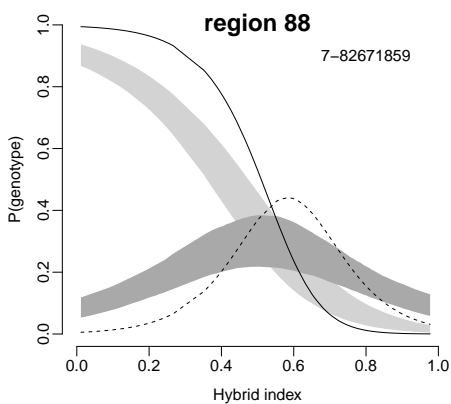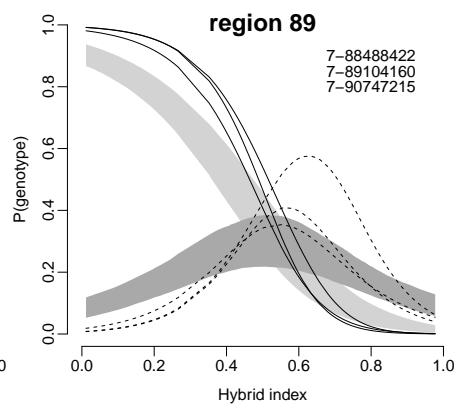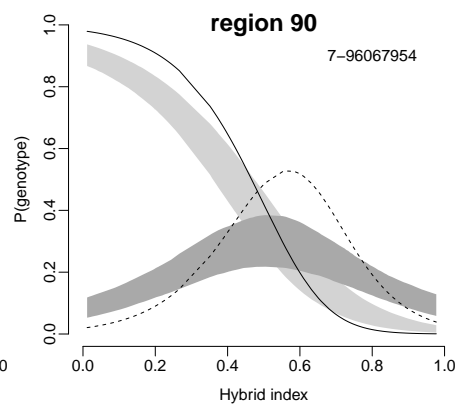

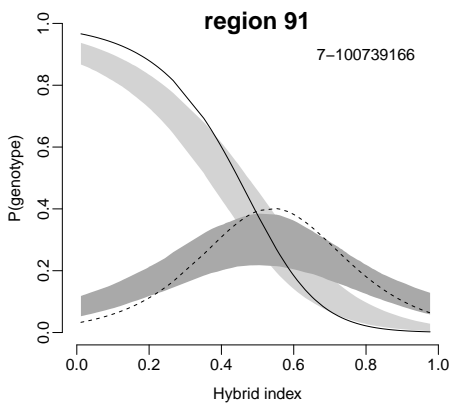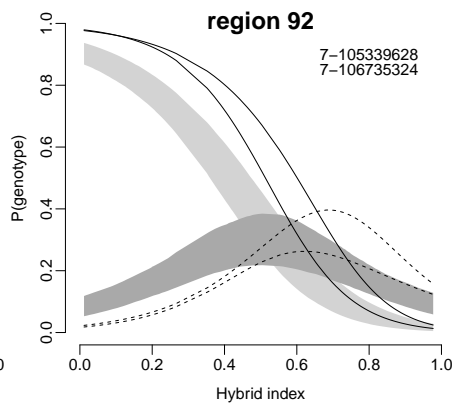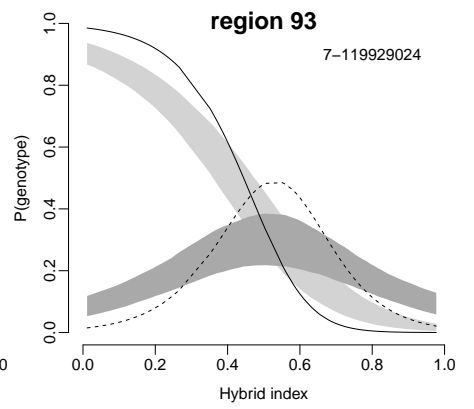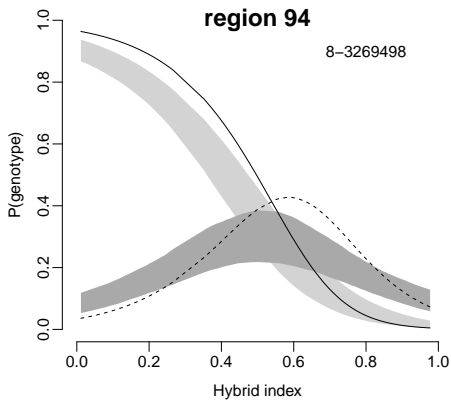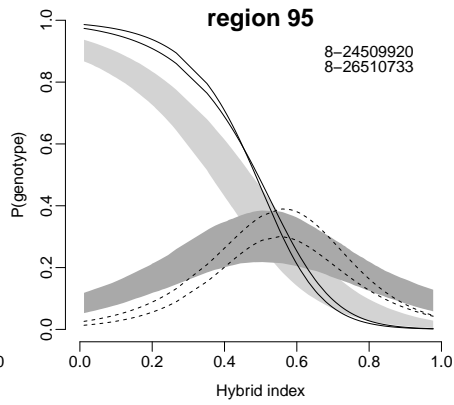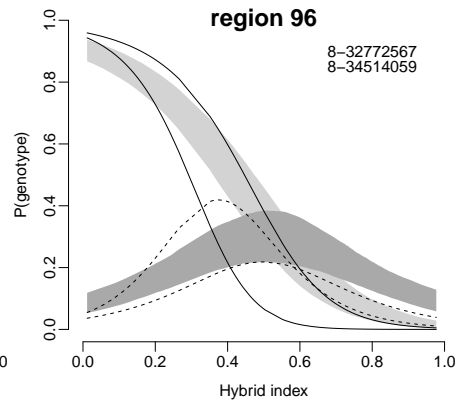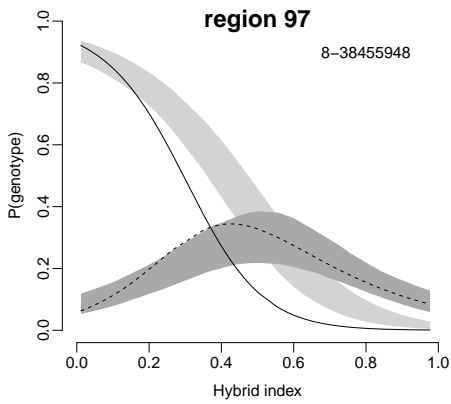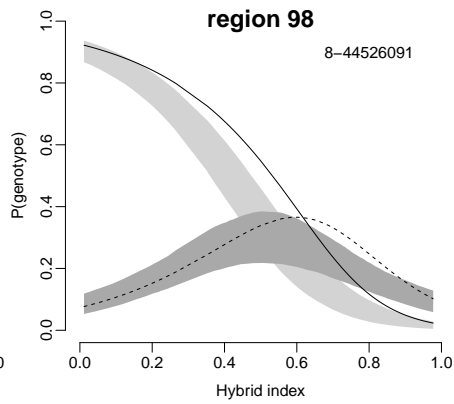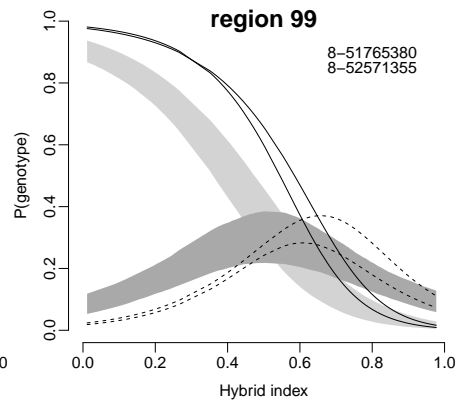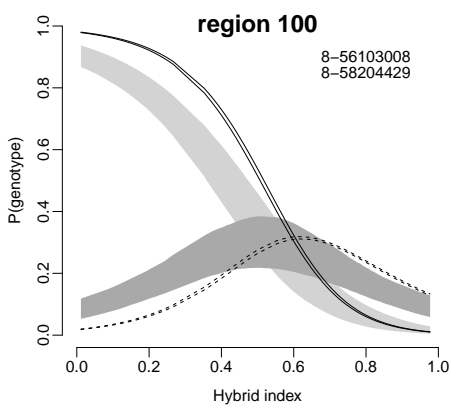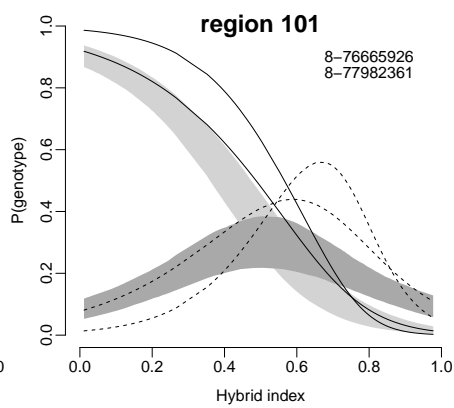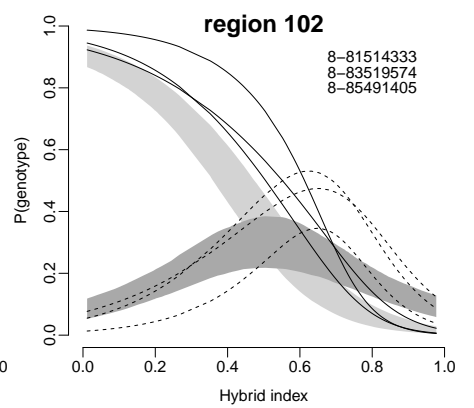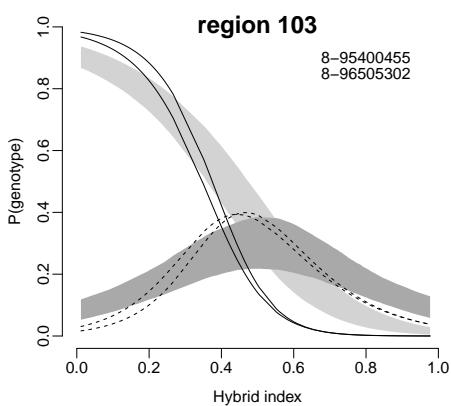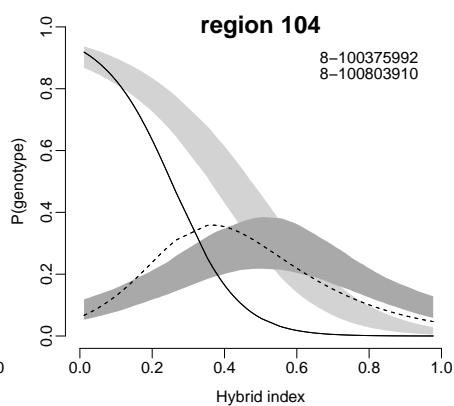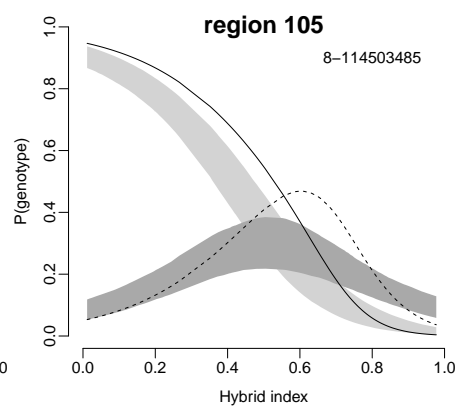

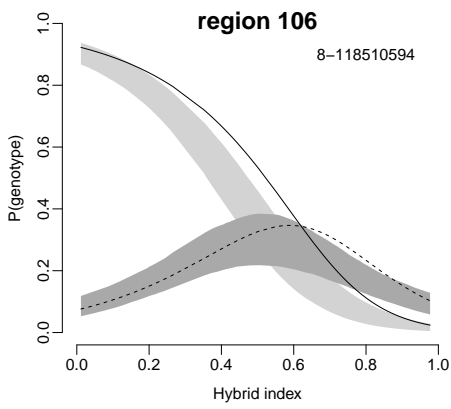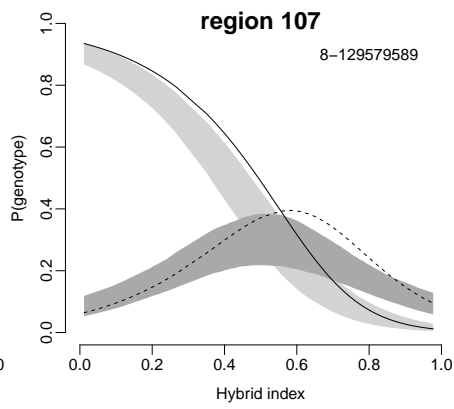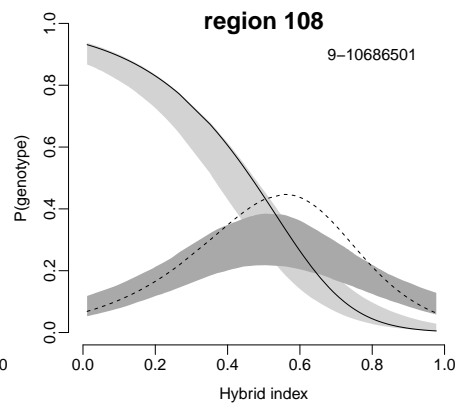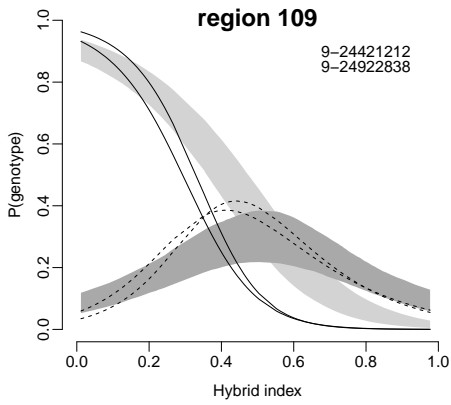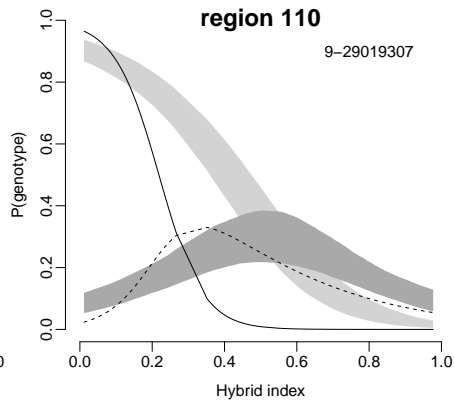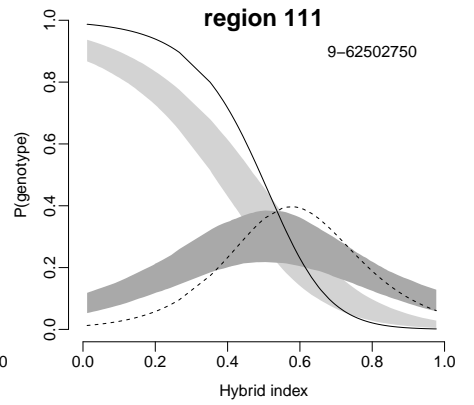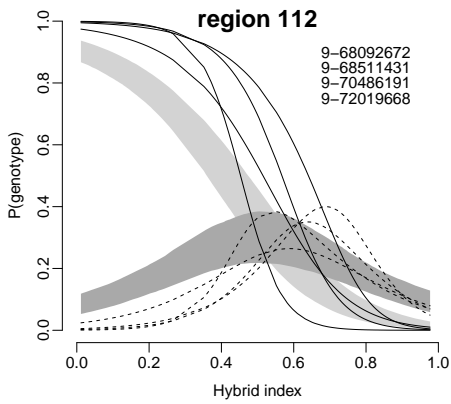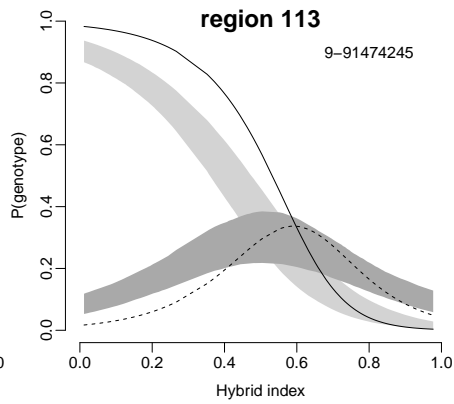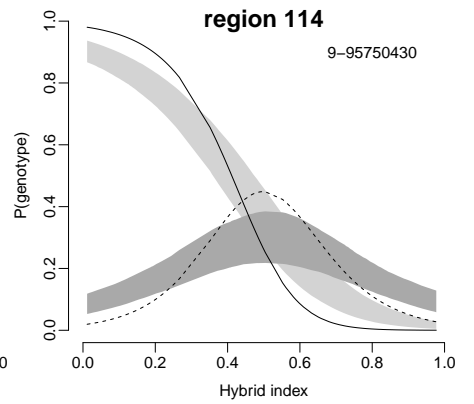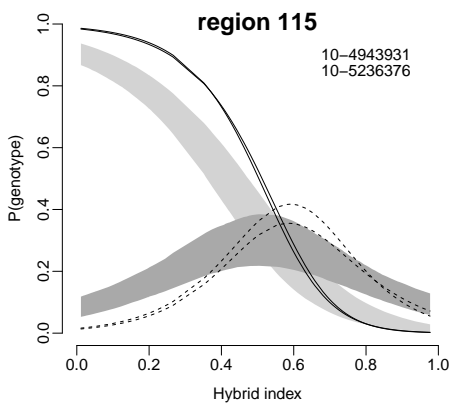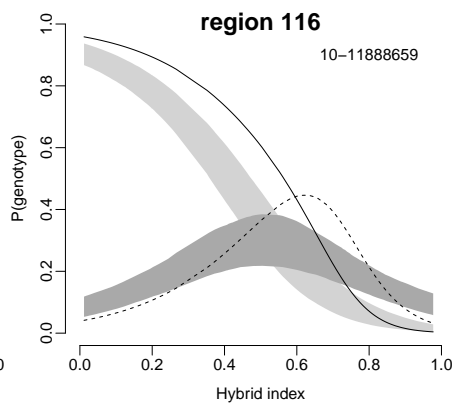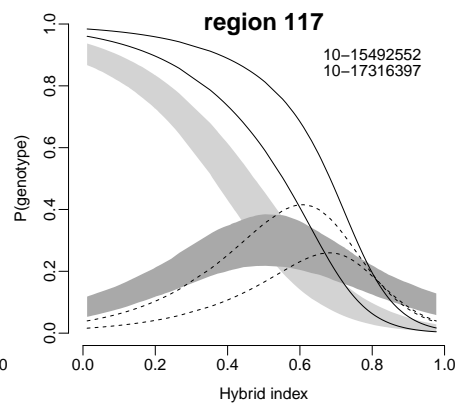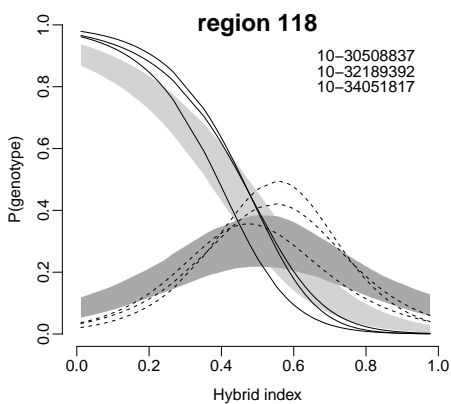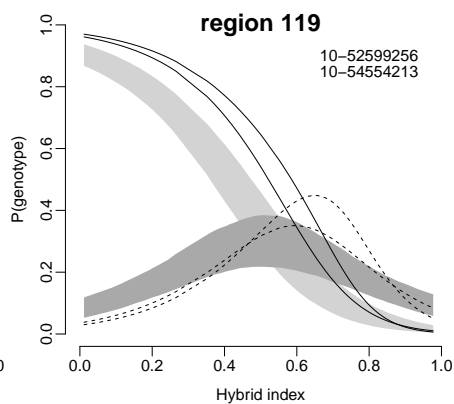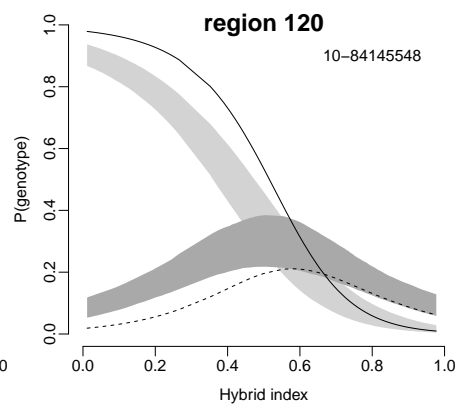



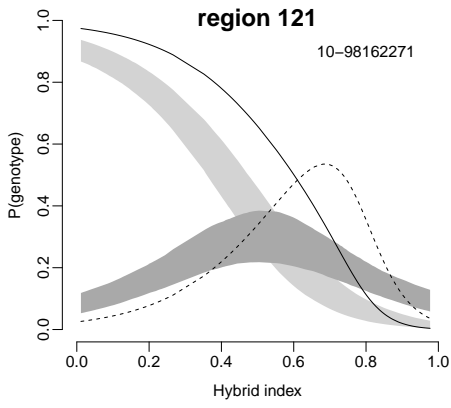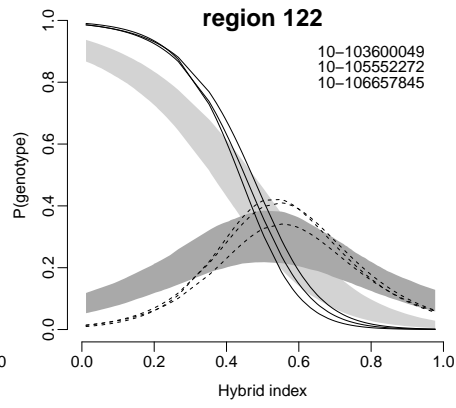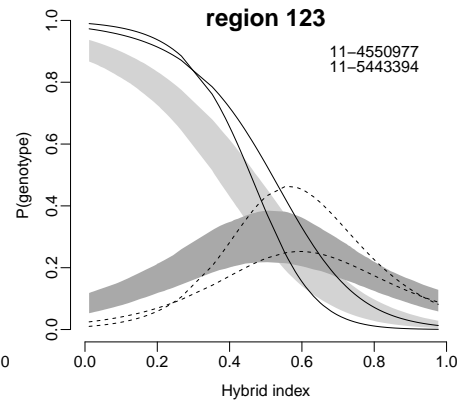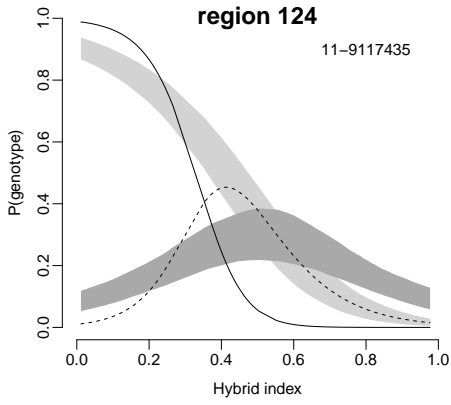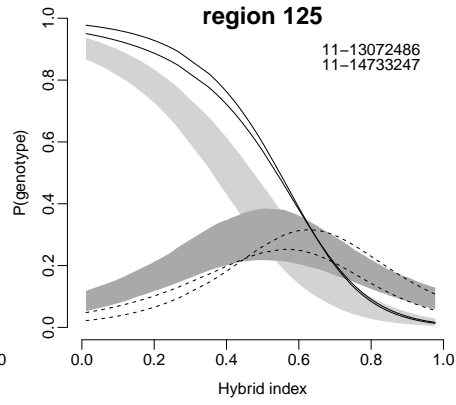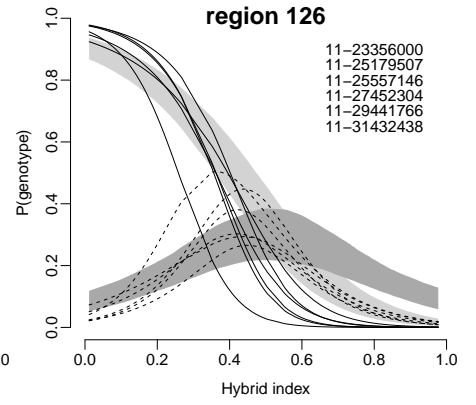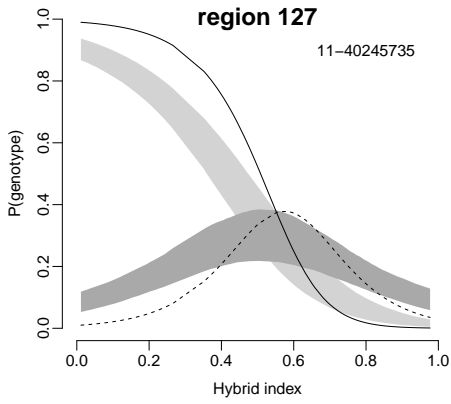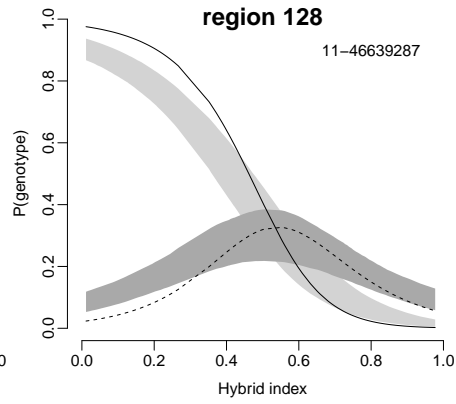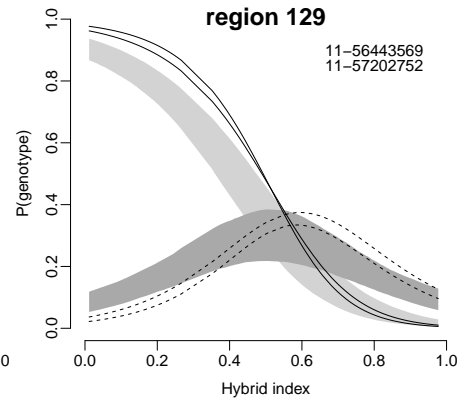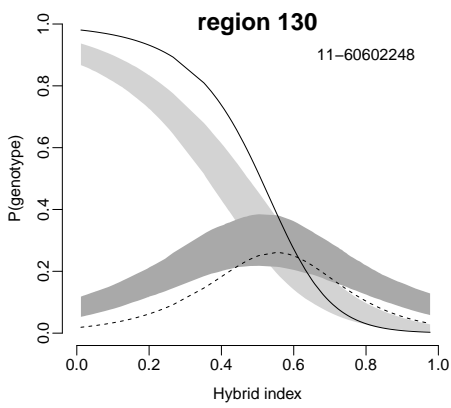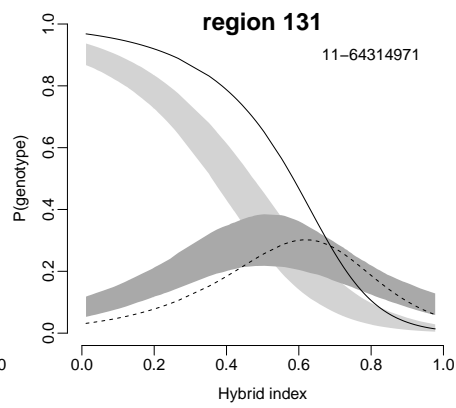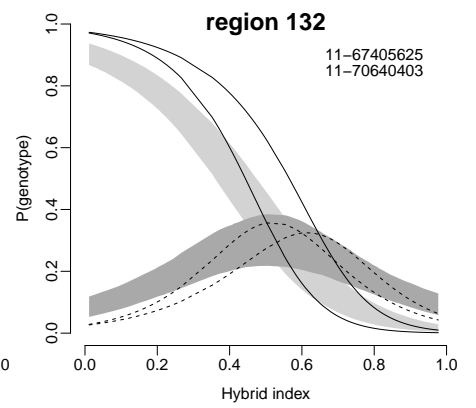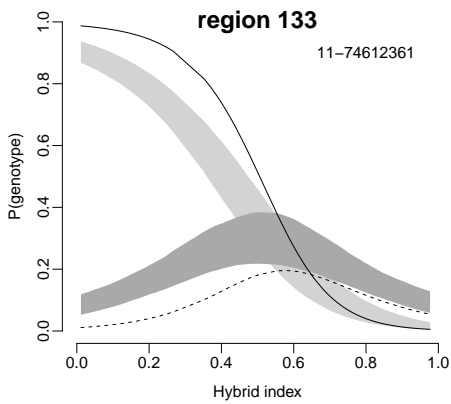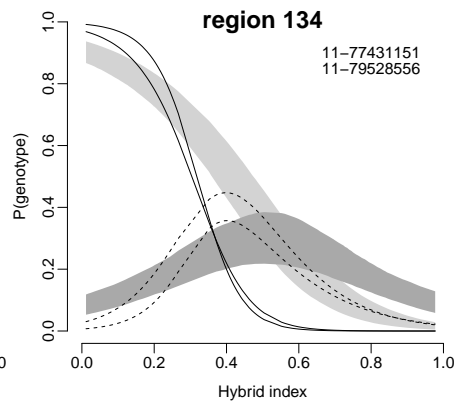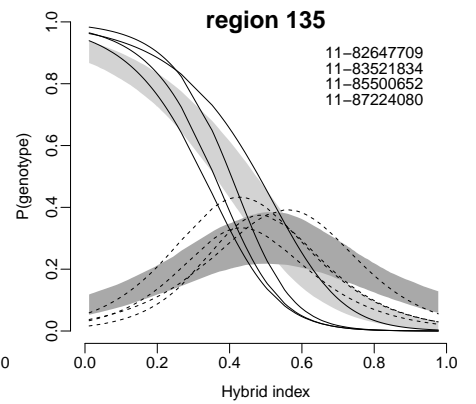

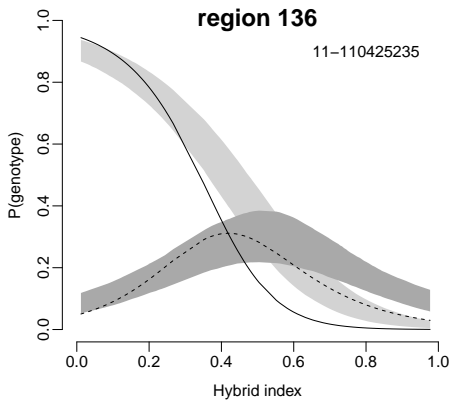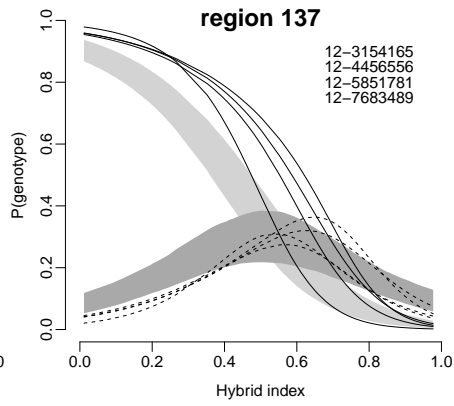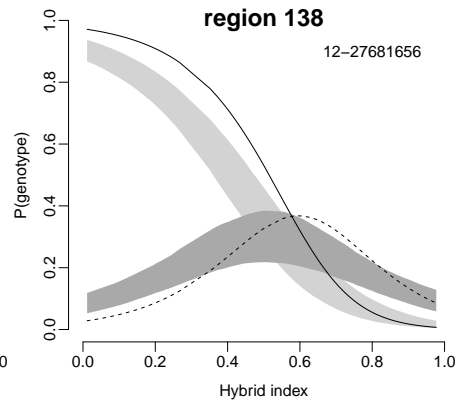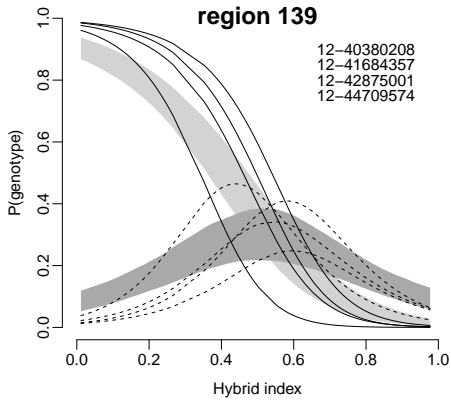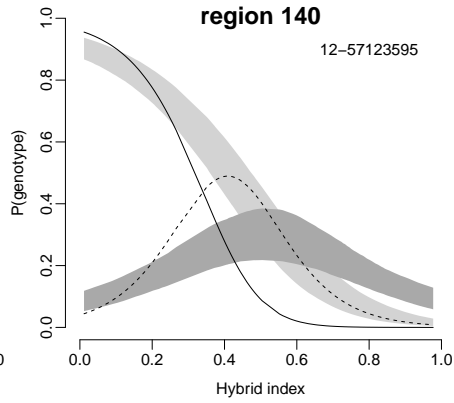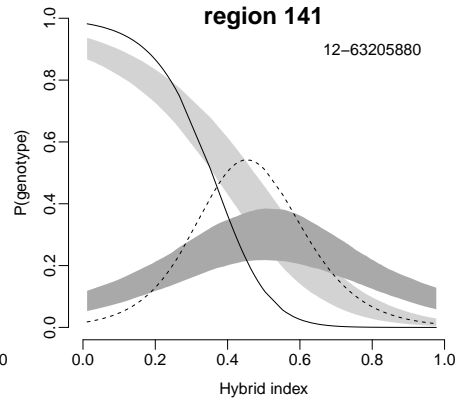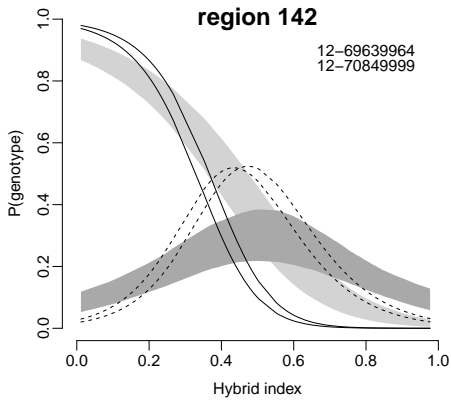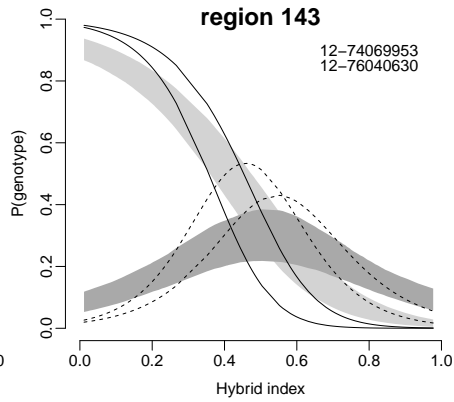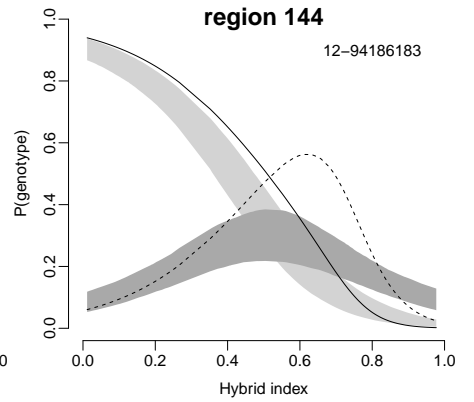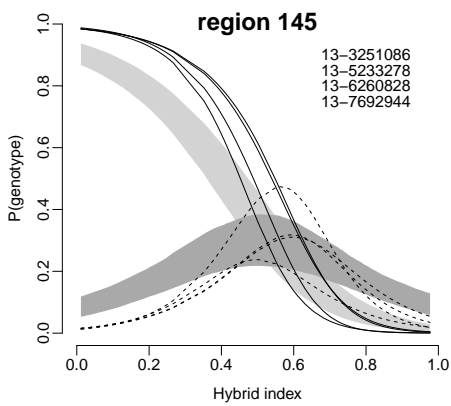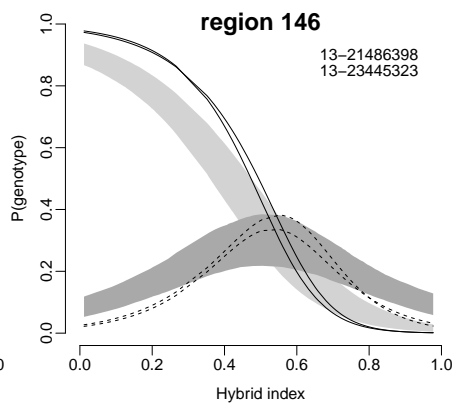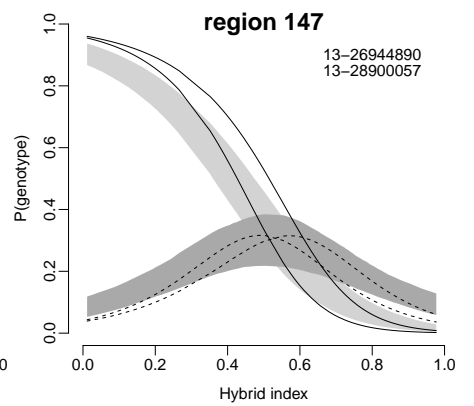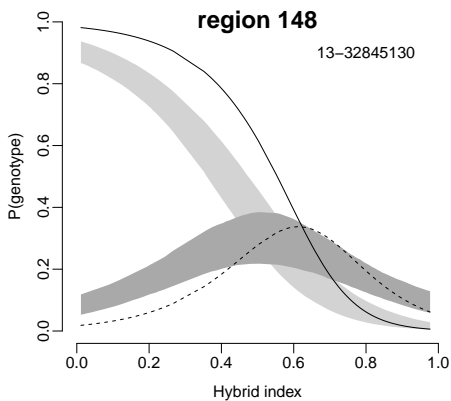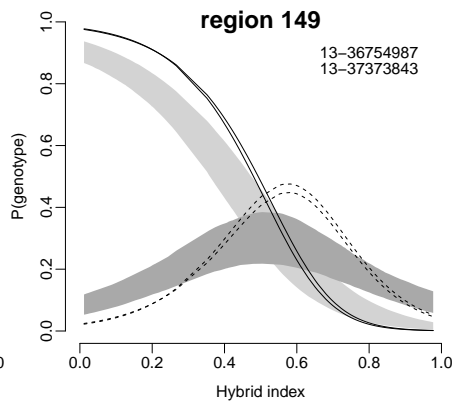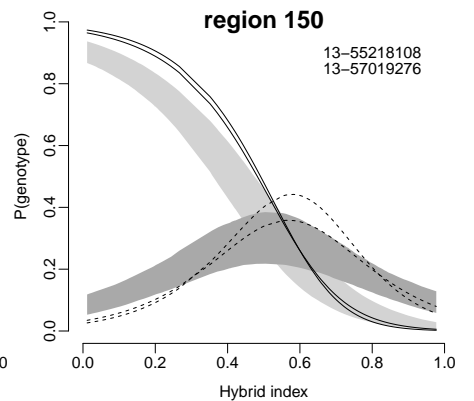

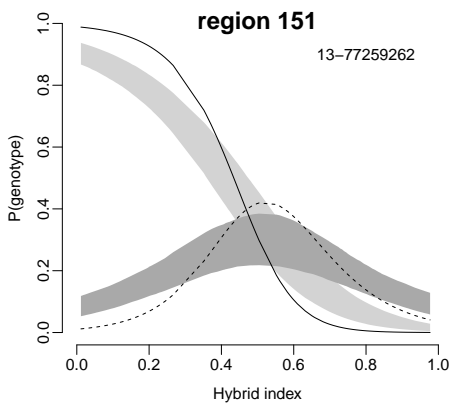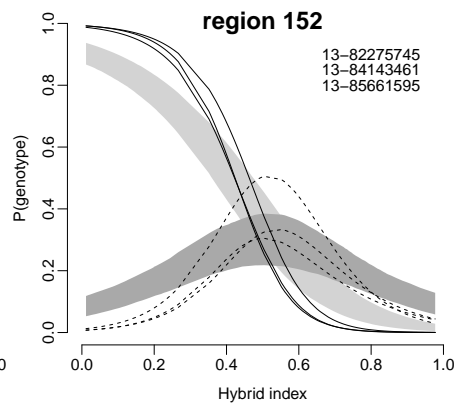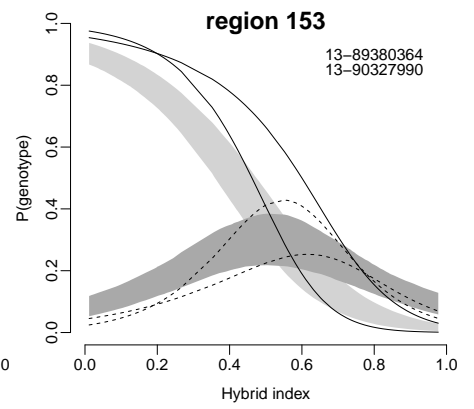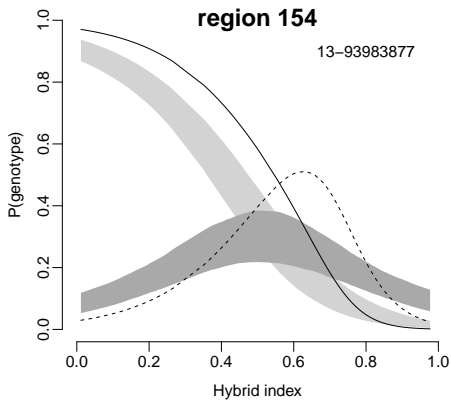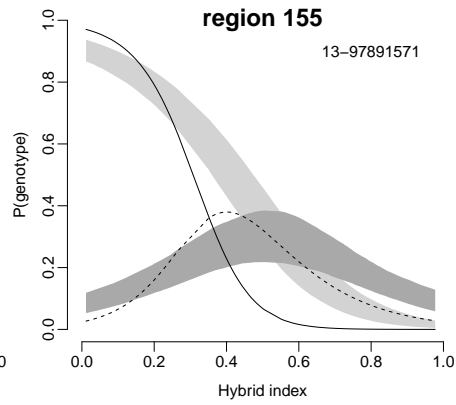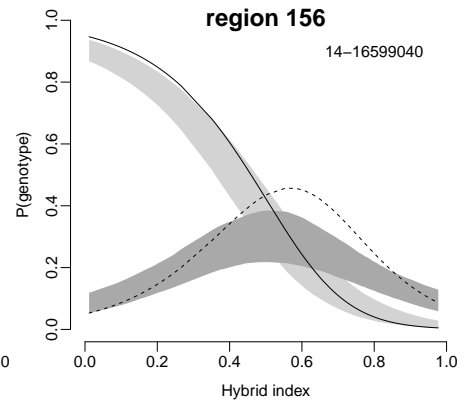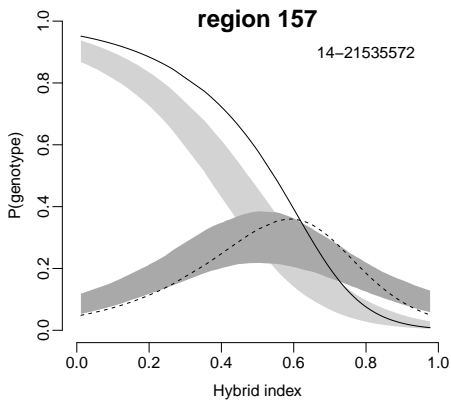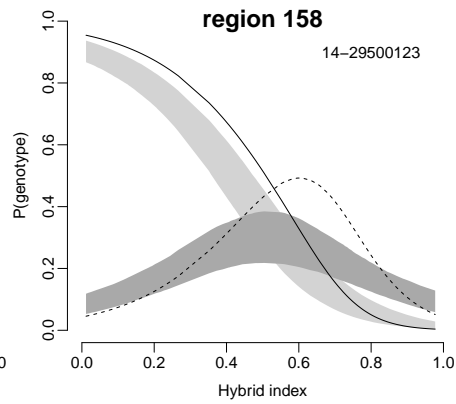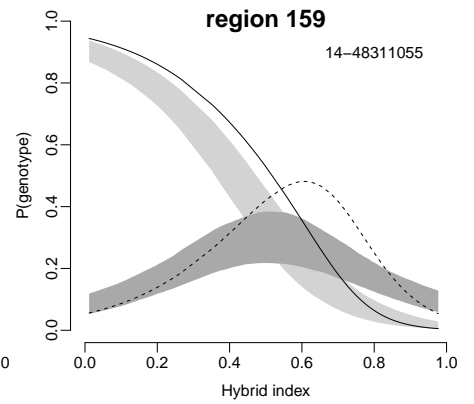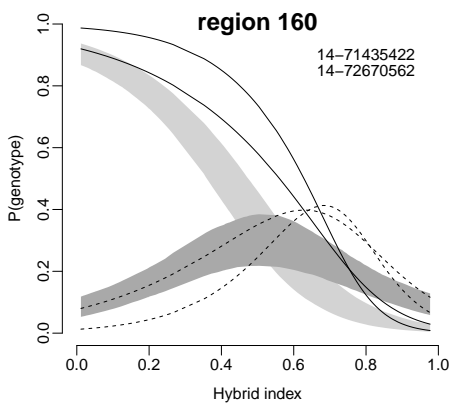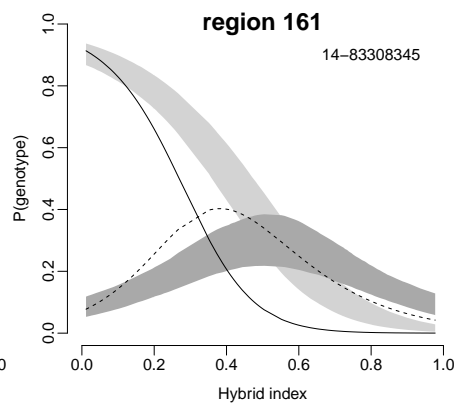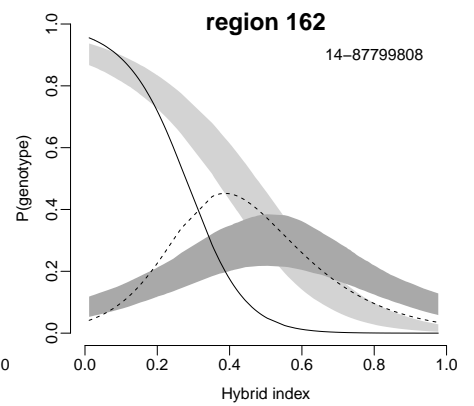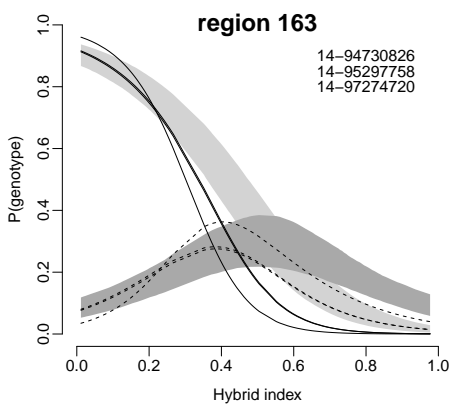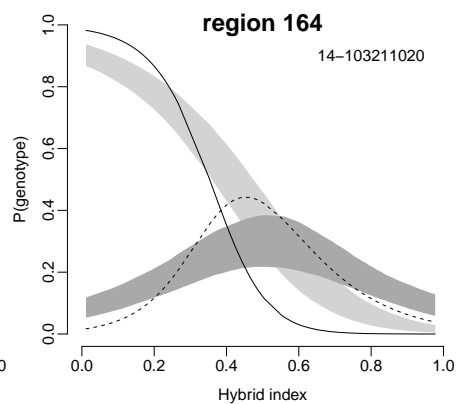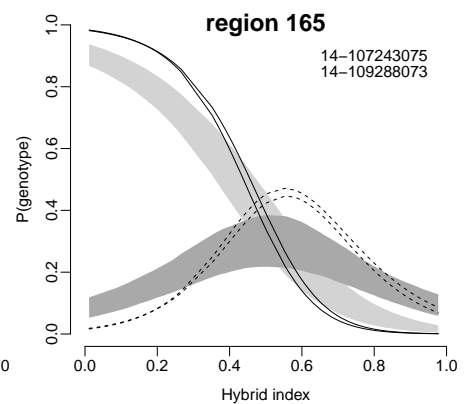

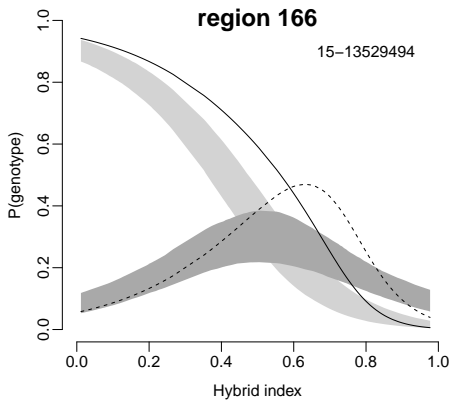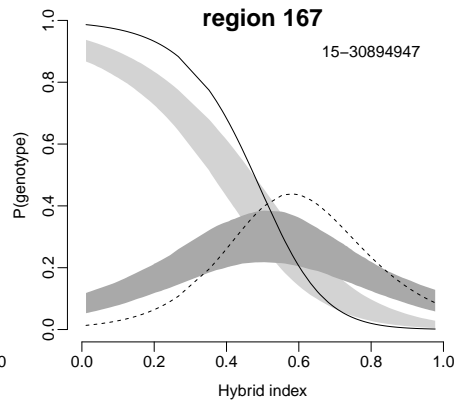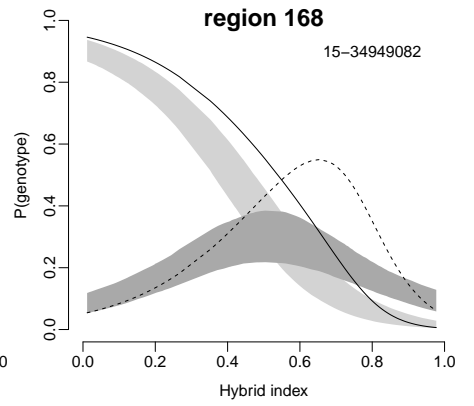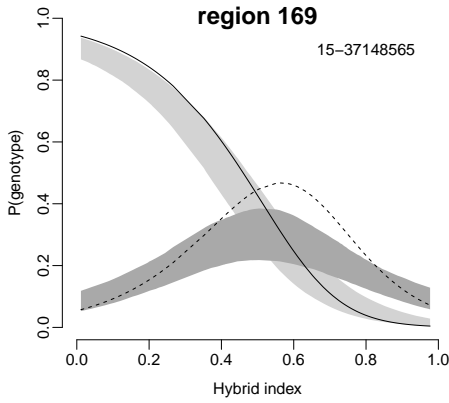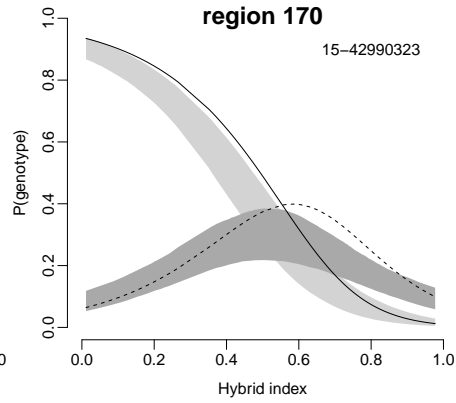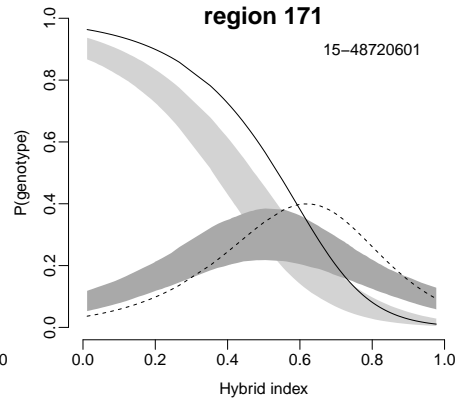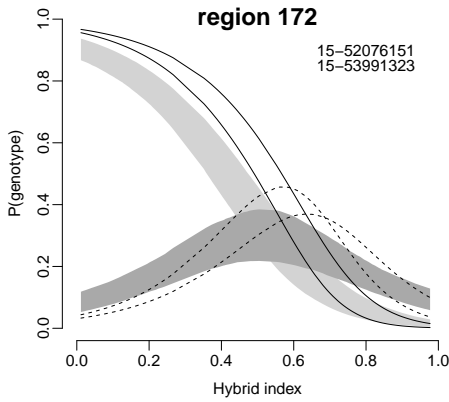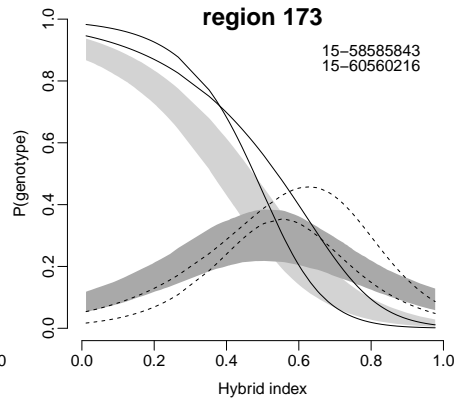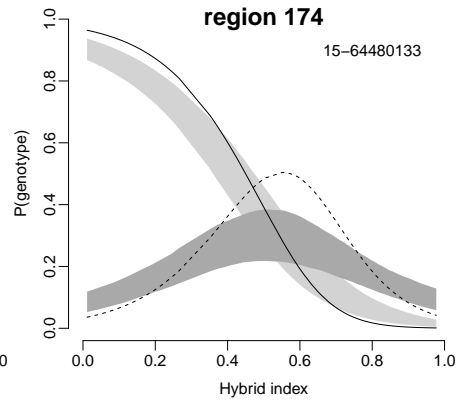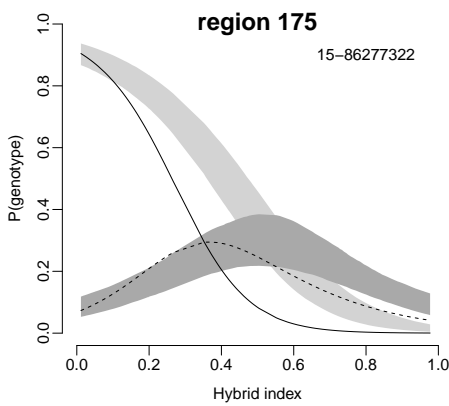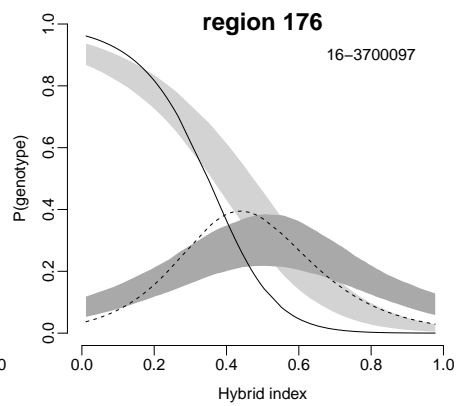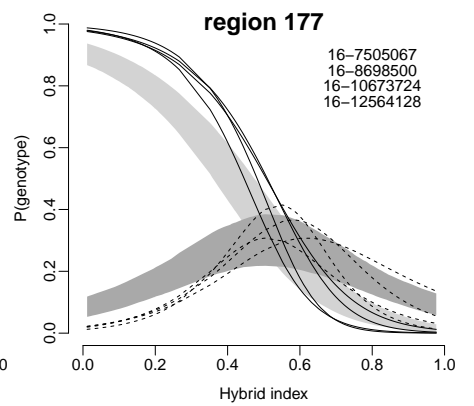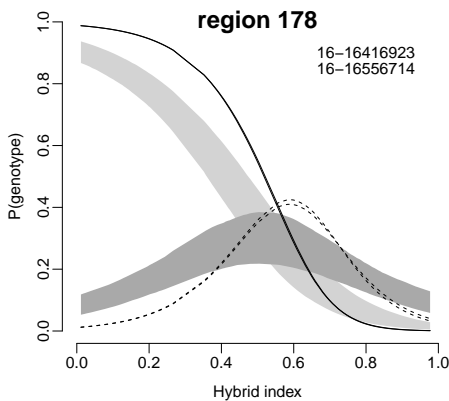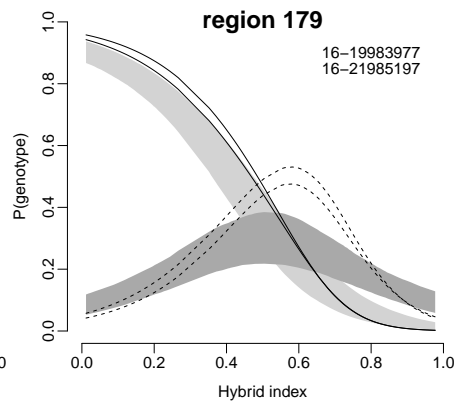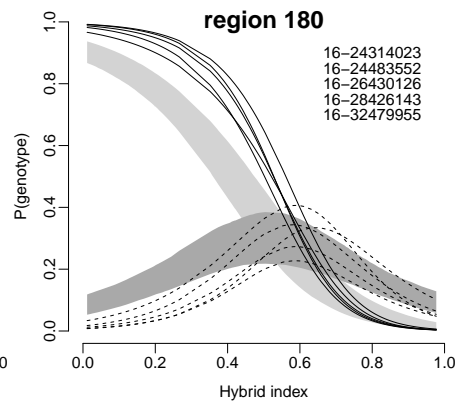

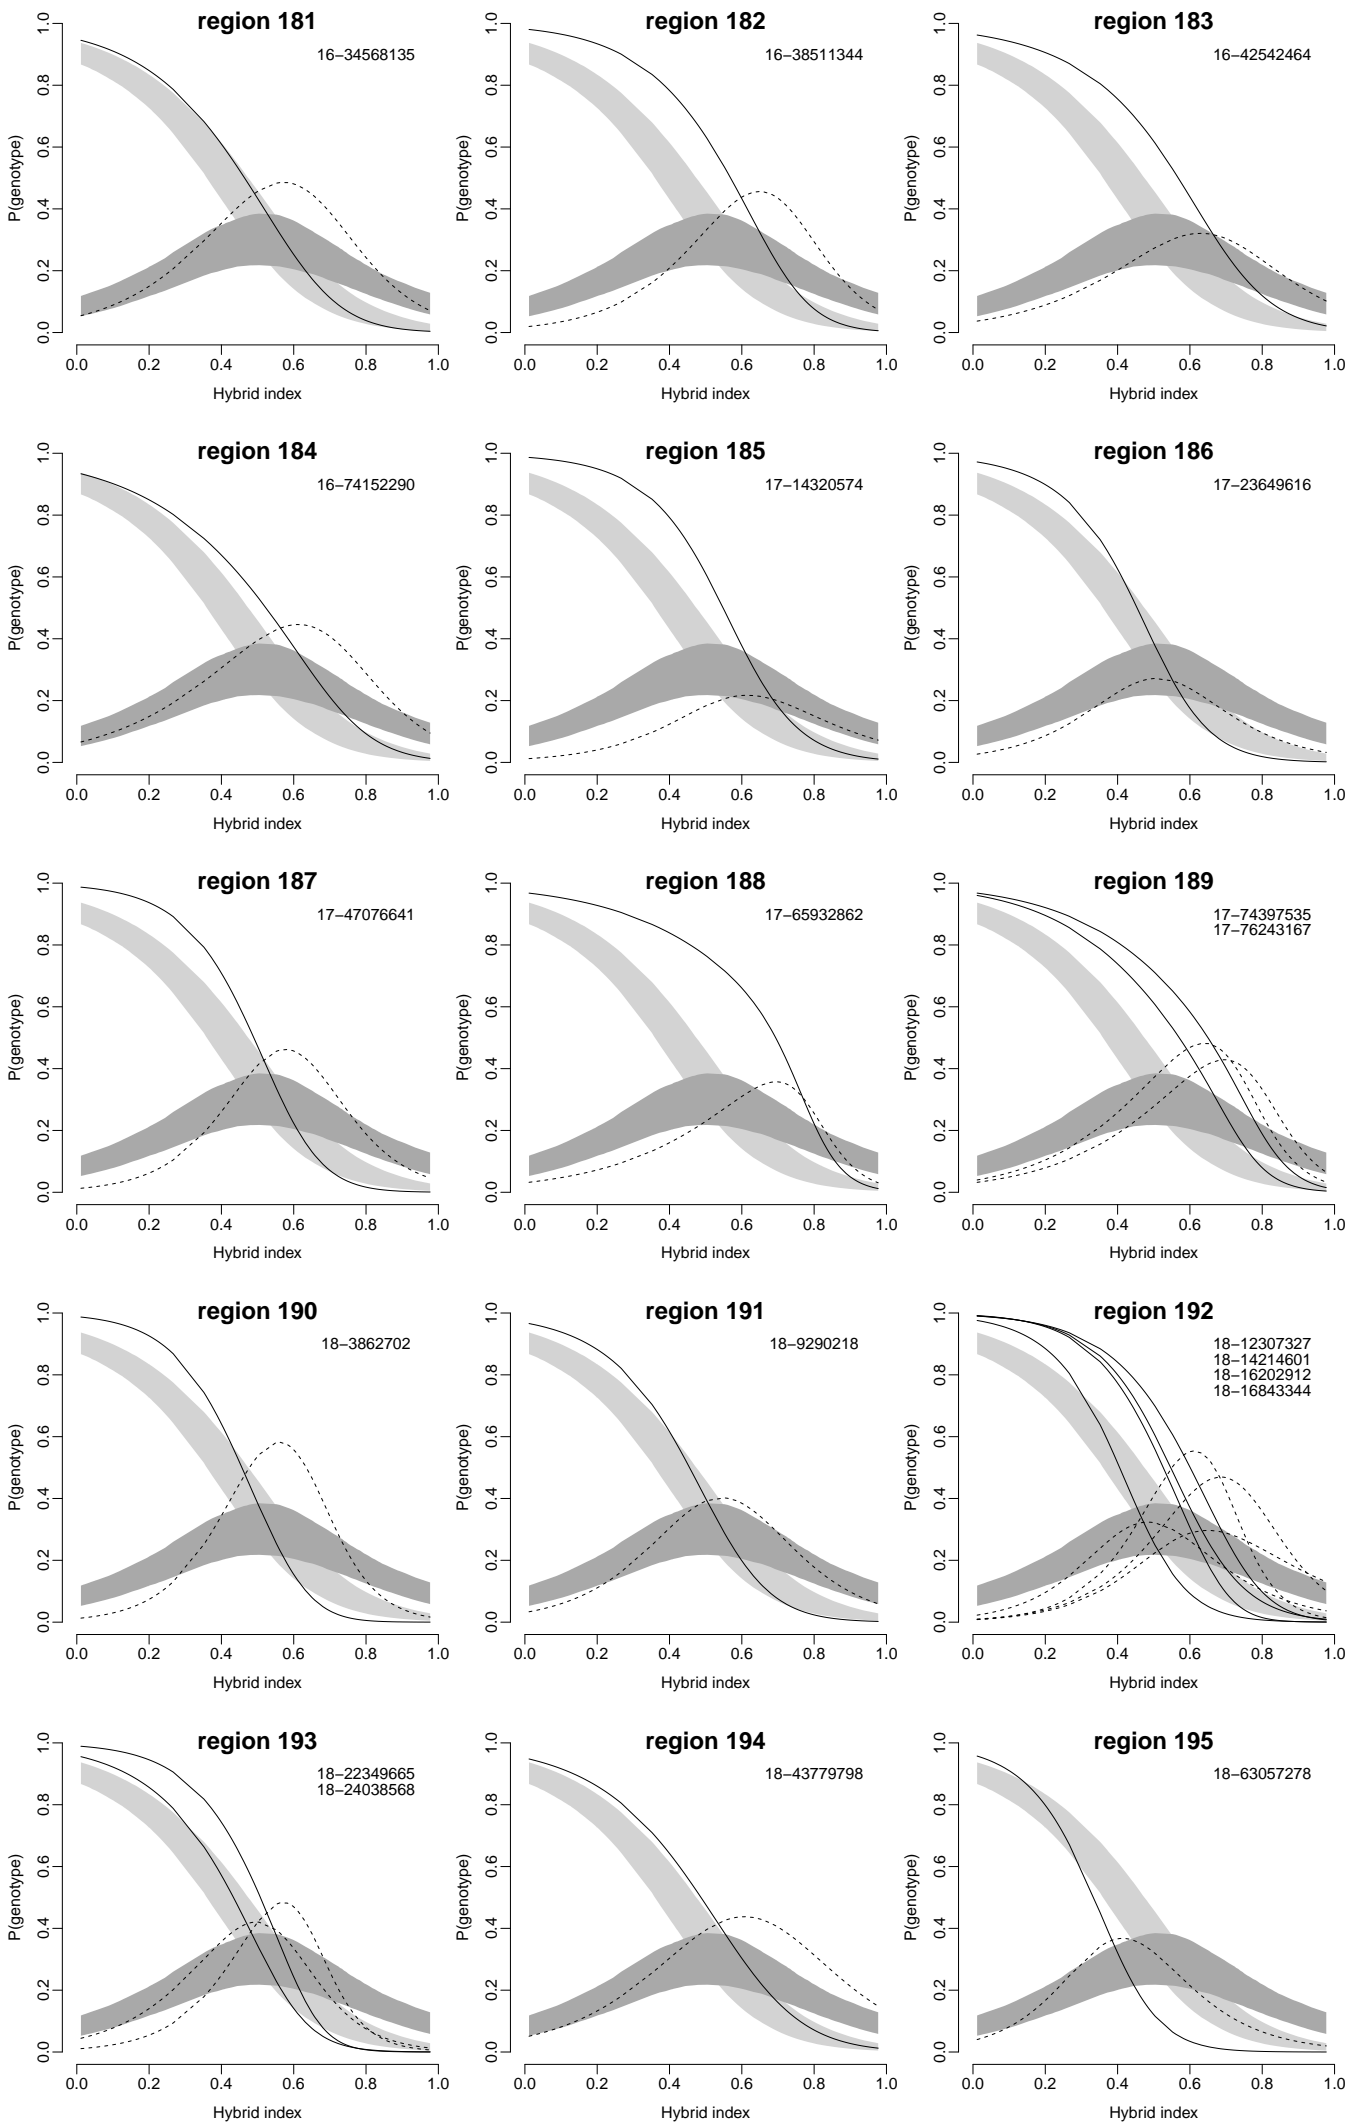

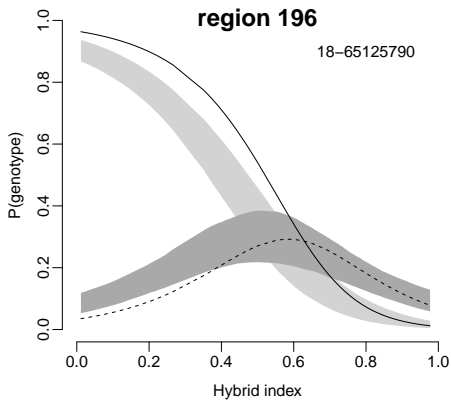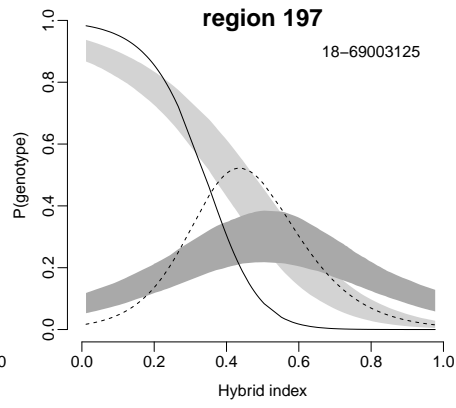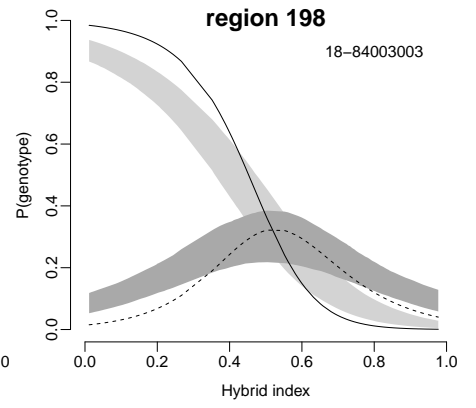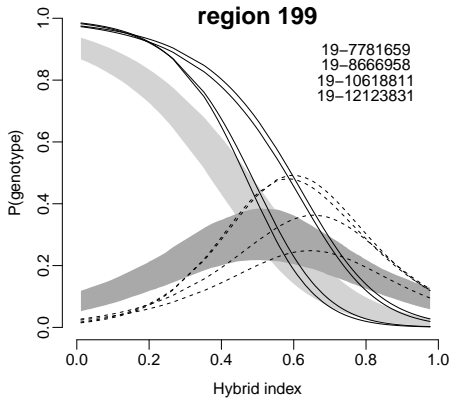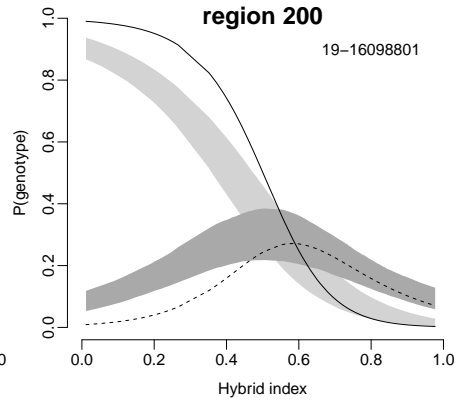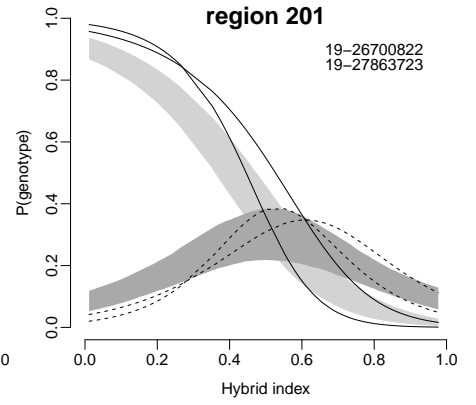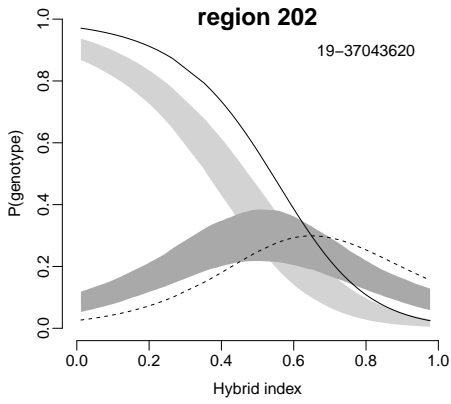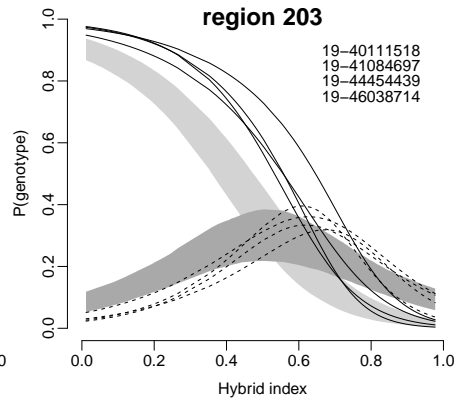

Supplement: NIHMS544236-supplement-Fig_S3b.pdf [file NIHMS544236-supplement-Fig_S3b.pdf]

## BV

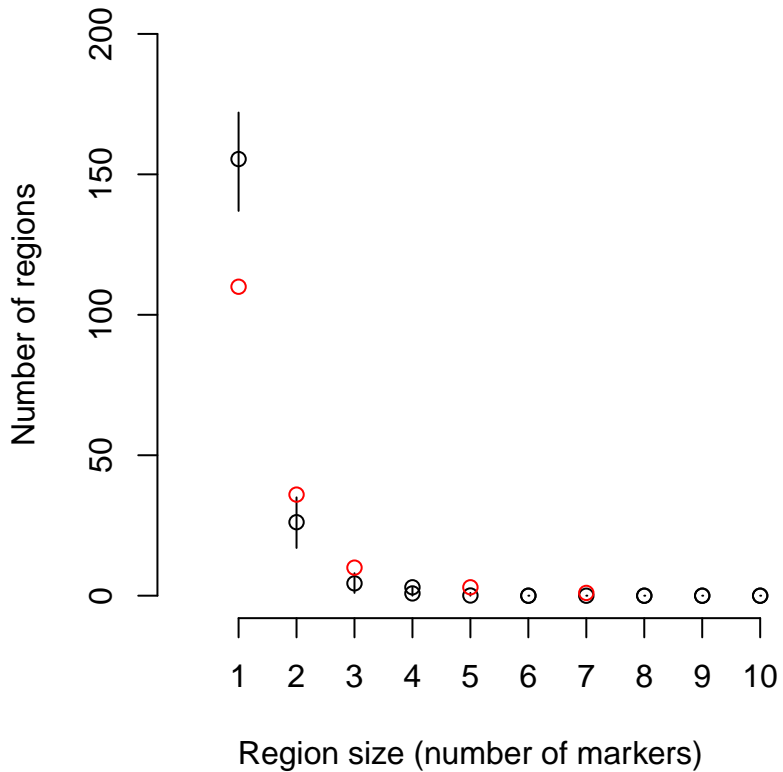

## CZ

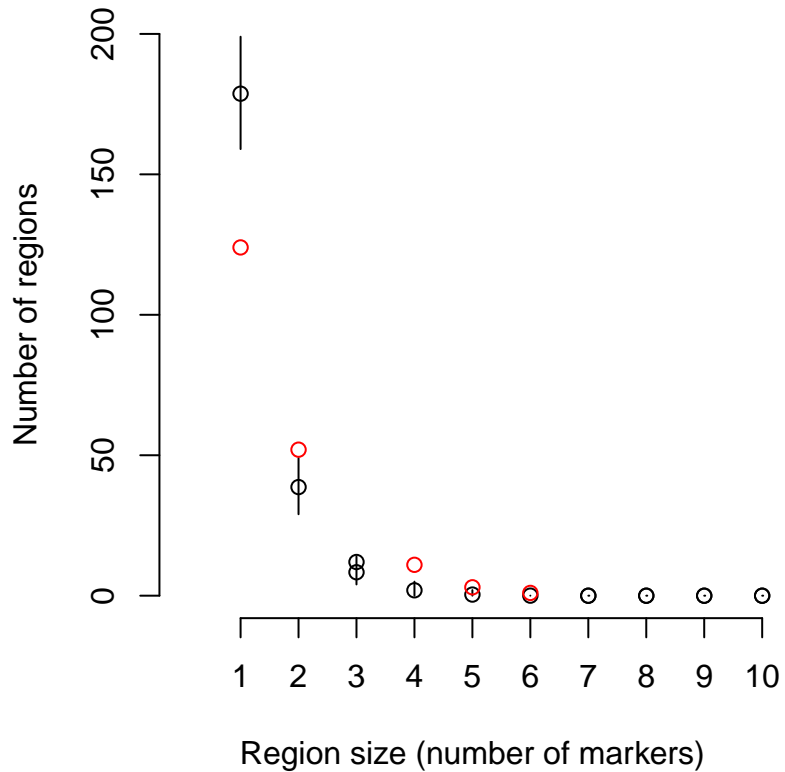

Supplement: NIHMS544236-supplement-Fig_S4a.pdf [file NIHMS544236-supplement-Fig_S4a.pdf]

## BV

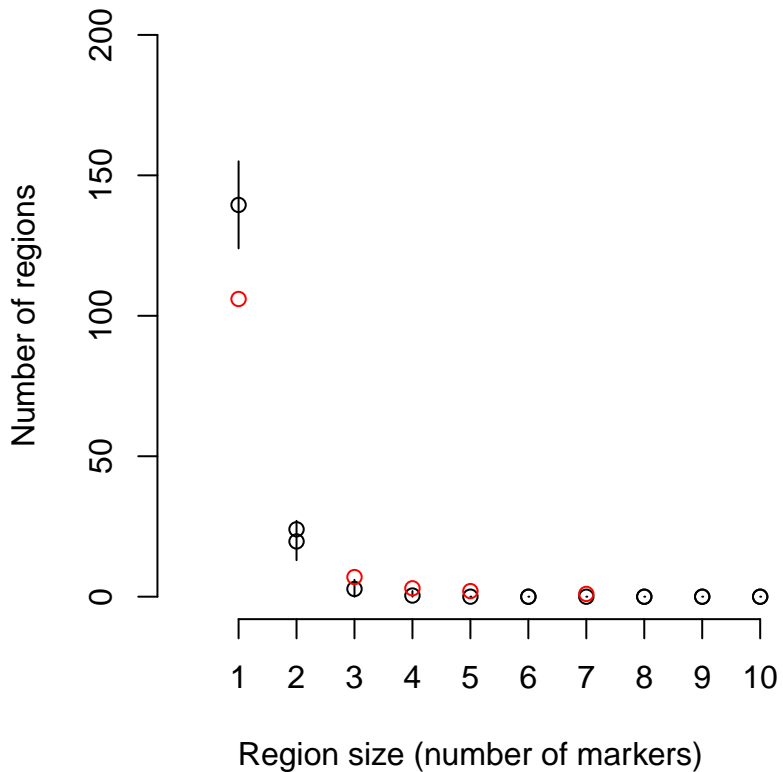

## CZ

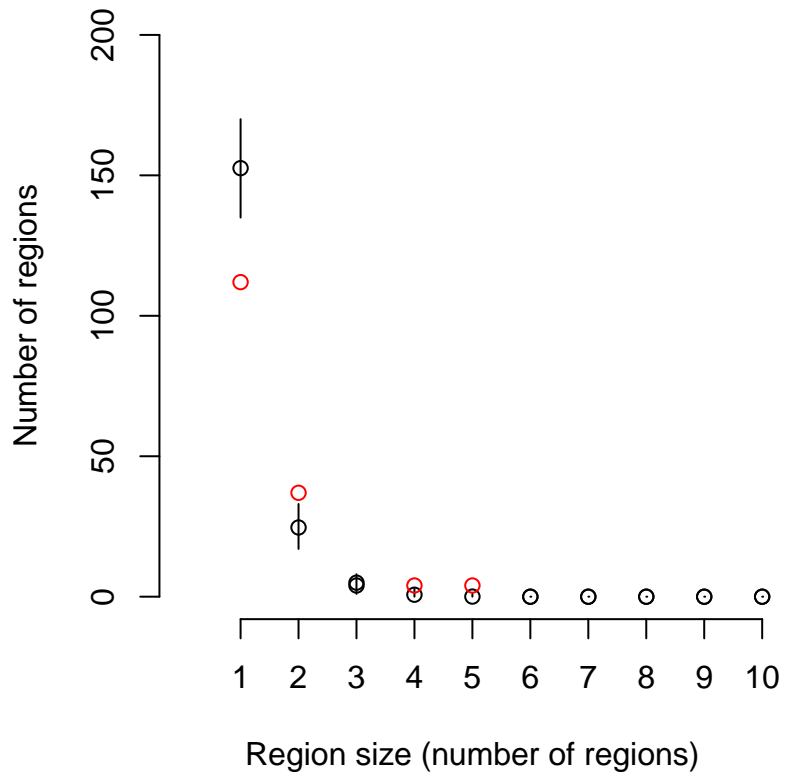

Supplement: NIHMS544236-supplement-Fig_S4b.pdf [file NIHMS544236-supplement-Fig_S4b.pdf]
